# Supplementary material for: C. eleganswhole-genome sequencing reveals mutational signatures related to carcinogens and DNA repair deficiency
Source: HighWire-hosted journal article supplement (doi:10.1101/gr.175547.114), 2014-07-16
Supplement: Supplemental_Material.docx [file Supplemental_Material.docx]

**SUPPLEMENTARY METHODS**

**Description of genotypes studied**

We first aimed to determine mutation rates in wild-type, as well as in mutants defective in apoptosis induction, telomere maintenance and in various DNA damage response pathways (Table S1, for reviews see ([Gartner et al. 2008](#_ENREF_7); [Lemmens and Tijsterman 2011](#_ENREF_11); [Bailly and Gartner 2013](#_ENREF_3)). *mrt‑2* encodes for the RAD1 subunit of the conserved 9‑1‑1 replication factor C-like complex, and has conserved roles in homologous recombination and DNA damage signaling, leading to checkpoint-induced apoptosis and cell cycle arrest ([Gartner et al. 2000](#_ENREF_8)). MRT‑2 moreover acts in the same genetic pathway as the TRT‑1 catalytic subunit of telomerase to ensure telomere length maintenance ([Ahmed and Hodgkin 2000](#_ENREF_2); [Meier et al. 2006](#_ENREF_12)). LIG‑4 is the *C. elegans* DNA ligase 4, needed for non-homologous end-joining (NHEJ), an error prone DNA double-strand break repair pathway. CED‑4, the *C. elegans* APAF-1 homologue is required for the vast majority of apoptotic cell death, while CEP‑1, the sole worm p53-like protein is only required for DNA damage induced germ cell apoptosis ([Derry et al. 2001](#_ENREF_6); [Schumacher et al. 2001](#_ENREF_15)). FCD‑2 is the *C. elegans* orthologue of the FancD2 Fanconi Anemia (FA) protein, a key scaffold protein ubiquitinylated in response to DNA damage and thought to coordinate various steps of DNA interstrand crosslink (ICL) repair ([Collis et al. 2006](#_ENREF_4); [Lee et al. 2007](#_ENREF_10)). XPA‑1 is a key nucleotide excision repair (NER) factor involved in recruiting several NER factors to DNA mismatches caused by UV induced cyclobutane-pyrimidine dimers and by bulky DNA adducts leading to the distortion of the DNA double helix ([Lans and Vermeulen 2011](#_ENREF_9)). *ung-1* encodes for the *C. elegans* uracil-DNA-glycosylase, which acts by eliminating uracil generated through cytosine deamination or uracil mis-incorporation ([Dengg et al. 2006](#_ENREF_5)). UNG‑1 cleaves uracil at the N-glycosylic bond and initiates base excision repair (BER).

**Post-processing of mutation calls**

After the initial variant calls were generated using our in-house pipeline, we developed a series of post-processing filters specifically for this project.

For substitutions, we required:

1. Minimum 20% reads in 'test worm' reporting variant;

2. Minimum coverage of 15 reads in ‘test’ and ‘control’ worms;

3. Maximum coverage of 150 reads in ‘control’ worm;

4. Maximum number of reads reporting the variant base in the ‘control’ worm = 1;

5. Maximum number of other samples variant called in = 0;

6. At least one read reporting the variant in both directions;

7. No more than one read mapped with an indel across the base;

8. Variant dropped if any one sample in panel of 5 ‘control’ worms has variant in 2 or more reads and 5% or more total reads.

For indels, we required:

1. Minimum 10% reads in ‘test’ worm reporting variant;

2. Minimum coverage of 10 reads in ‘test’ and ‘control’ worms;

3. Maximum coverage of 150 reads in ‘control’ worm;

4. Maximum number of reads reporting the variant base in the ‘control’ worm = 1;

5. Maximum number of other samples variant called in = 0;

6. At least one read reporting the variant in both directions;

7. No more than 8 repeat units at site;

8. Variant dropped if any one sample in panel of 5 ‘control’ worms has variant in 2 or more reads;

9. Minimum number of reads reporting variant = 5.

**SUPPLEMENTARY FIGURE LEGENDS**

**Figure S1.** Estimated mutation rate per genome per generation across the genetic backgrounds followed for 20 generations. Point estimates of the mean are shown, and the lines denote the mean plus or minus the standard error of the mean.

**Figure S2.** Proposed model for the evolution of copy number changes and genomic rearrangements in a worm with *mrt‑2* deficiency. Telomere attrition on one parental copy of ChrV leads to an end-to-end chromosome fusion (marked ➊), which results in an anaphase bridge during mitosis. This generates a further break in the next cell cycle, which is similarly fused by end-to-end inverted rearrangement (marked ➋). In the same cell cycle, the telomere crisis on the other parental copy of ChrV also generates an end-to-end inverted fusion (marked ➊ in pink). During the subsequent anaphase, both parental copies now generate anaphase bridges, resulting in simultaneous acquisition of multiple DNA breaks with cytokinesis. These are resolved by a series of rearrangements (marked ➌) that leads to a fusion of the two parental copies and resolution of the telomere crisis.

**Figure S3.** Viability of progeny of different genetic backgrounds exposed to increasing doses of (**A**) aflatoxin B1, (**B**) mechlorethamine and (**C**) cisplatin. The relative survival of embryos derived from three toxin treated worms was measured (n=3) in triplicate. While reduced progeny viability mutants was observed in *mus‑81, slx‑1* and *xpf‑1* mutants as described previously ([Agostinho et al. 2013](#_ENREF_1); [O'Neil et al. 2013](#_ENREF_13); [Saito et al. 2013](#_ENREF_14)), the viability of each strain without treatment was set as 100% for better comparison.

**Figure S4.** Patterns of dinucleotide substitution in human cancers. (**A**) Average prevalence of dinucleotide substitutions per megabase across different cancer types studied. (**B**) Dinucleotide substitutions in different human cancers. The sequences of the dinucleotides that are mutated are on the x axis, and what they are mutated to is denoted by the colour of the bar.

**Figure S5.** Chromoanasynthesis in a *fan‑1* deficient worm treated with cisplatin. Copy number profile and genomic rearrangements observed on chromosome X is shown.

**Figure S6.** Percentage of embryonic lethality in cisplatin-treated worms, showing considerable heterogeneity across different replicates even within a single dose-genotype combination.

**SUPPLEMENTARY REFERENCES**

Agostinho A, Meier B, Sonneville R, Jagut M, Woglar A, Blow J, Jantsch V, Gartner A. 2013. Combinatorial regulation of meiotic holliday junction resolution in *C. elegans* by HIM-6 (BLM) helicase, SLX-4, and the SLX-1, MUS-81 and XPF-1 nucleases. *PLoS Genet* **9:** e1003591.

Ahmed S, Hodgkin J. 2000. MRT-2 checkpoint protein is required for germline immortality and telomere replication in *C. elegans*. *Nature* **403:** 159-164.

Bailly A, Gartner A. 2013. Germ cell apoptosis and DNA damage responses. *Adv Exp Med Biol* **757:** 249-276.

Collis SJ, Barber LJ, Ward JD, Martin JS, Boulton SJ. 2006. *C. elegans* FANCD2 responds to replication stress and functions in interstrand cross-link repair. *DNA Repair* **5:** 1398-1406.

Dengg M, Garcia-Muse T, Gill SG, Ashcroft N, Boulton SJ, Nilsen H. 2006. Abrogation of the CLK-2 checkpoint leads to tolerance to base-excision repair intermediates. *EMBO Rep* **7:** 1046-1051.

Derry WB, Putzke AP, Rothman JH. 2001. *Caenorhabditis elegans* p53: role in apoptosis, meiosis, and stress resistance. *Science* **294:** 591-595.

Gartner A, Boag PR, Blackwell TK. 2008. Germline survival and apoptosis. *WormBook* 1-20.

Gartner A, Milstein S, Ahmed S, Hodgkin J, Hengartner MO. 2000. A conserved checkpoint pathway mediates DNA damage--induced apoptosis and cell cycle arrest in *C. elegans*. *Mol Cell* **5:** 435-443.

Lans H, Vermeulen W. 2011. Nucleotide Excision Repair in *Caenorhabditis elegans*. *Mol Biol Int* **2011**: 542795.

Lee KY, Yang I, Park JE, Baek OR, Chung KY, Koo HS. 2007. Developmental stage- and DNA damage-specific functions of *C. elegans* FANCD2. *Biochem Biophys Res Commun* **352:** 479-485.

Lemmens BB, Tijsterman M. 2011. DNA double-strand break repair in Caenorhabditis elegans. *Chromosoma* **120:** 1-21.

Meier B, Clejan I, Liu Y, Lowden M, Gartner A, Hodgkin J, Ahmed S. 2006. trt-1 is the *Caenorhabditis elegans* catalytic subunit of telomerase. *PLoS Genet* **2:** e18.

O'Neil NJ, Martin JS, Youds JL, Ward JD, Petalcorin MI, Rose AM, Boulton SJ. 2013. Joint molecule resolution requires the redundant activities of MUS-81 and XPF-1 during *Caenorhabditis elegans* meiosis. *PLoS Genet* **9:** e1003582.

Saito TT, Lui DY, Kim HM, Meyer K, Colaiacovo MP. 2013. Interplay between structure-specific endonucleases for crossover control during *Caenorhabditis elegans* meiosis. *PLoS Genet* **9**: e1003586.

Schumacher B, Hofmann K, Boulton S, Gartner A. 2001. The *C. elegans* homolog of the p53 tumor suppressor is required for DNA damage-induced apoptosis. *Curr Biol* **11:** 1722-1727.
