# Supplementary material for: C. eleganswhole-genome sequencing reveals mutational signatures related to carcinogens and DNA repair deficiency
Source: HighWire-hosted journal article supplement (doi:10.1101/gr.175547.114), 2014-07-16
Supplement: Supplemental_Tables.xlsx [file Supplemental_Tables.xlsx]

## Sheet: Supplementary table 1
Supplementary table 1. Description of genetic backgrounds and strains analysed in this study.
strain	genotype	DNA repair pathway/cellular function
TG1813	wild-type (N2 reference)
TG2030	ced-4(n1162)	All apoptosis
TG1814	cep-1(lg12501)	Germ cell apoptosis
TG2150	csb-1(ok2335)	Transcription-coupled nucleotide excision repair
TG2229	fan-1(tm423)	DNA crosslink repair
TG1794	fcd-2(tm1298)	DNA crosslink repair
TG1796	lig-4(ok716)	Non-homologous end-joining
TG1969	lig-4(ok716); fcd‑2(tm1298)	Non-homologous end-joining, DNA crosslink repair
TG1809	mrt-2(e2663)	Telomere replication, homologous recombination, DNA damage checkpoint
TG2148	mus-81(tm1937)	Homologous recombination, DNA crosslink repair, meiosis
TG2228	polq-1(tm2026)	Translesion synthesis, DNA crosslink repair
TG2154	slx-1(tm2644)	Homologous recombination, DNA crosslink repair, meiosis
TG1793	trt-1(ok410)	Telomere replication
TG1790	ung-1(tm2862)	Base excision repair
TG2146	xpa-1(ok698)	Nucleotide excision repair
TG2226	xpc-1(tm3886)	Global genome nucleotide excision repair
TG2227	xpf-1(tm2842)	NER, DNA crosslink repair, meiosis

## Sheet: Supplementary table 2
Supplementary table 2. Summary of samples sequenced at whole genome coverage that were exposed to carcinogens or followed for 20 generations
Sample	Genotype	Experiment	Concentration
CD0001a	N2	20 generation	0
CD0001c	N2	20 generation	0
CD0001d	N2	20 generation	0
CD0030a	N2	20 generation	0
CD0030c	N2	20 generation	0
CD0030d	N2	20 generation	0
CD0002a	ung-1	20 generation	0
CD0002c	ung-1	20 generation	0
CD0002d	ung-1	20 generation	0
CD0003a	cep-1	20 generation	0
CD0003c	cep-1	20 generation	0
CD0003d	cep-1	20 generation	0
CD0004a	xpa-1	20 generation	0
CD0004c	xpa-1	20 generation	0
CD0004d	xpa-1	20 generation	0
CD0005a	fcd-2	20 generation	0
CD0005c	fcd-2	20 generation	0
CD0005d	fcd-2	20 generation	0
CD0006a	lig-4	20 generation	0
CD0006c	lig-4	20 generation	0
CD0006d	lig-4	20 generation	0
CD0008d	trt-1	20 generation	0
CD0008e	trt-1	20 generation	0
CD0008g	trt-1	20 generation	0
CD0009c	mrt-2	20 generation	0
CD0009f	mrt-2	20 generation	0
CD0009h	mrt-2	20 generation	0
CD0031a	ced-4	20 generation	0
CD0031c	ced-4	20 generation	0
CD0031d	ced-4	20 generation	0
CD0010a	N2	Aflatoxin	0
CD0010c	N2	Aflatoxin	0
CD0010d	N2	Aflatoxin	0
CD0011a	xpa-1	Aflatoxin	0
CD0011c	xpa-1	Aflatoxin	0
CD0011d	xpa-1	Aflatoxin	0
CD0012a	csb-1	Aflatoxin	0
CD0012c	csb-1	Aflatoxin	0
CD0012d	csb-1	Aflatoxin	0
CD0013a	xpc-1	Aflatoxin	0
CD0013c	xpc-1	Aflatoxin	0
CD0013d	xpc-1	Aflatoxin	0
CD0014a	xpf-1	Aflatoxin	0
CD0014c	xpf-1	Aflatoxin	0
CD0014d	xpf-1	Aflatoxin	0
CD0015a	polq-1	Aflatoxin	0
CD0015c	polq-1	Aflatoxin	0
CD0015d	polq-1	Aflatoxin	0
CD0016a	N2	Aflatoxin	0.3
CD0016c	N2	Aflatoxin	0.3
CD0016d	N2	Aflatoxin	0.3
CD0017a	xpa-1	Aflatoxin	0.3
CD0017c	xpa-1	Aflatoxin	0.3
CD0017d	xpa-1	Aflatoxin	0.3
CD0018a	csb-1	Aflatoxin	0.3
CD0018c	csb-1	Aflatoxin	0.3
CD0018d	csb-1	Aflatoxin	0.3
CD0019a	xpc-1	Aflatoxin	0.3
CD0019c	xpc-1	Aflatoxin	0.3
CD0019d	xpc-1	Aflatoxin	0.3
CD0020a	xpf-1	Aflatoxin	0.3
CD0020c	xpf-1	Aflatoxin	0.3
CD0020d	xpf-1	Aflatoxin	0.3
CD0021a	polq-1	Aflatoxin	0.3
CD0021c	polq-1	Aflatoxin	0.3
CD0021d	polq-1	Aflatoxin	0.3
CD0022a	N2	Aflatoxin	3
CD0022c	N2	Aflatoxin	3
CD0022d	N2	Aflatoxin	3
CD0023a	xpa-1	Aflatoxin	3
CD0023c	xpa-1	Aflatoxin	3
CD0023d	xpa-1	Aflatoxin	3
CD0024a	csb-1	Aflatoxin	3
CD0024c	csb-1	Aflatoxin	3
CD0024d	csb-1	Aflatoxin	3
CD0025a	xpc-1	Aflatoxin	3
CD0025c	xpc-1	Aflatoxin	3
CD0025d	xpc-1	Aflatoxin	3
CD0026a	xpf-1	Aflatoxin	3
CD0026c	xpf-1	Aflatoxin	3
CD0026d	xpf-1	Aflatoxin	3
CD0027a	polq-1	Aflatoxin	3
CD0027c	polq-1	Aflatoxin	3
CD0027d	polq-1	Aflatoxin	3
CD0032a	N2	Mechlorethamine	0
CD0032c	N2	Mechlorethamine	0
CD0032d	N2	Mechlorethamine	0
CD0033a	fan-1	Mechlorethamine	0
CD0033c	fan-1	Mechlorethamine	0
CD0033d	fan-1	Mechlorethamine	0
CD0034a	fcd-2	Mechlorethamine	0
CD0034c	fcd-2	Mechlorethamine	0
CD0034d	fcd-2	Mechlorethamine	0
CD0035a	N2	Mechlorethamine	20
CD0035c	N2	Mechlorethamine	20
CD0035d	N2	Mechlorethamine	20
CD0036a	fan-1	Mechlorethamine	20
CD0036c	fan-1	Mechlorethamine	20
CD0036d	fan-1	Mechlorethamine	20
CD0037a	fcd-2	Mechlorethamine	20
CD0037c	fcd-2	Mechlorethamine	20
CD0037d	fcd-2	Mechlorethamine	20
CD0038a	N2	Cisplatin	0
CD0038c	N2	Cisplatin	0
CD0038d	N2	Cisplatin	0
CD0039a	fan-1	Cisplatin	0
CD0039c	fan-1	Cisplatin	0
CD0039d	fan-1	Cisplatin	0
CD0040a	fcd-2	Cisplatin	0
CD0040c	fcd-2	Cisplatin	0
CD0040d	fcd-2	Cisplatin	0
CD0041a	lig-4; fcd-2	Cisplatin	0
CD0041c	lig-4; fcd-2	Cisplatin	0
CD0041d	lig-4; fcd-2	Cisplatin	0
CD0042a	lig-4	Cisplatin	0
CD0042c	lig-4	Cisplatin	0
CD0042d	lig-4	Cisplatin	0
CD0043a	mus-81	Cisplatin	0
CD0043c	mus-81	Cisplatin	0
CD0043d	mus-81	Cisplatin	0
CD0044a	polq-1	Cisplatin	0
CD0044c	polq-1	Cisplatin	0
CD0044d	polq-1	Cisplatin	0
CD0045a	slx-1	Cisplatin	0
CD0045c	slx-1	Cisplatin	0
CD0045d	slx-1	Cisplatin	0
CD0046a	xpf-1	Cisplatin	0
CD0046c	xpf-1	Cisplatin	0
CD0046d	xpf-1	Cisplatin	0
CD0047a	N2	Cisplatin	10
CD0047c	N2	Cisplatin	10
CD0047d	N2	Cisplatin	10
CD0048a	fan-1	Cisplatin	10
CD0048c	fan-1	Cisplatin	10
CD0048d	fan-1	Cisplatin	10
CD0049a	fcd-2	Cisplatin	10
CD0049c	fcd-2	Cisplatin	10
CD0049d	fcd-2	Cisplatin	10
CD0050a	lig-4; fcd-2	Cisplatin	10
CD0050c	lig-4; fcd-2	Cisplatin	10
CD0050d	lig-4; fcd-2	Cisplatin	10
CD0051a	lig-4	Cisplatin	10
CD0051c	lig-4	Cisplatin	10
CD0051d	lig-4	Cisplatin	10
CD0052a	mus-81	Cisplatin	10
CD0052c	mus-81	Cisplatin	10
CD0052d	mus-81	Cisplatin	10
CD0053a	polq-1	Cisplatin	10
CD0053c	polq-1	Cisplatin	10
CD0053d	polq-1	Cisplatin	10
CD0054a	slx-1	Cisplatin	10
CD0054c	slx-1	Cisplatin	10
CD0054d	slx-1	Cisplatin	10
CD0055a	xpf-1	Cisplatin	10
CD0055c	xpf-1	Cisplatin	10
CD0055d	xpf-1	Cisplatin	10
CD0056a	N2	Cisplatin	50
CD0056c	N2	Cisplatin	50
CD0056d	N2	Cisplatin	50
CD0057a	fan-1	Cisplatin	50
CD0057c	fan-1	Cisplatin	50
CD0057d	fan-1	Cisplatin	50
CD0058a	fcd-2	Cisplatin	50
CD0058c	fcd-2	Cisplatin	50
CD0058d	fcd-2	Cisplatin	50
CD0059a	lig-4; fcd-2	Cisplatin	50
CD0059c	lig-4; fcd-2	Cisplatin	50
CD0059d	lig-4; fcd-2	Cisplatin	50
CD0060a	lig-4	Cisplatin	50
CD0060c	lig-4	Cisplatin	50
CD0060d	lig-4	Cisplatin	50
CD0061a	mus-81	Cisplatin	50
CD0061c	mus-81	Cisplatin	50
CD0061d	mus-81	Cisplatin	50
CD0062a	polq-1	Cisplatin	50
CD0062c	polq-1	Cisplatin	50
CD0062d	polq-1	Cisplatin	50
CD0063a	slx-1	Cisplatin	50
CD0063c	slx-1	Cisplatin	50
CD0063d	slx-1	Cisplatin	50
CD0064a	xpf-1	Cisplatin	50
CD0064c	xpf-1	Cisplatin	50
CD0064d	xpf-1	Cisplatin	50

## Sheet: Supplementary table 3
Supplementary table 3. Newly acquired base substitutions identified in this study.
ID	Genotype	Drug	Concentration	CHR	POS	REF_BASE	TOP_GENOTYPE	TOP_GENOTYPE_PROB	2ND_GENOTYPE	2ND_GENOTYPE_PROB	NORM_A	NORM_C	NORM_G	NORM_T	MUT_A	MUT_C	MUT_G	MUT_T	NORM_COVERAGE	TUM_COVERAGE	MUT_TYPE	CONTEXT	GENE_FOOTPRINT	STRAND_TX
CD0001a	N2	None	0	I	6945674	A	AA/GG	1	AG/GG	3.8e-12	46	0	0	0	0	0	60	0	46	60	T>C	CTTTAAA	No_gene	No_gene
CD0001a	N2	None	0	II	12649008	T	TT/AT	1	AT/AT	1.6e-09	0	0	0	37	25	0	0	17	37	42	T>A	TTTTAAA	No_gene	No_gene
CD0001a	N2	None	0	II	12770220	T	TT/GG	0.81	TT/GT	0.19	0	0	0	21	0	0	2	0	21	2	T>G	CAATACG	Y46G5A.13	Non-transcribed
CD0001a	N2	None	0	II	13334311	G	GG/AA	0.9	GG/AG	0.1	0	0	43	0	3	0	0	0	43	3	C>T	CTGCGTC	No_gene	No_gene
CD0001a	N2	None	0	II	13334507	A	AA/AG	1	AG/AG	8.8e-08	31	0	0	0	15	0	6	0	31	21	T>C	TGGTGCC	No_gene	No_gene
CD0001a	N2	None	0	II	13334511	C	CC/AC	1	AC/AC	2.3e-08	0	33	0	0	6	15	0	0	33	21	C>A	CCACTTG	No_gene	No_gene
CD0001a	N2	None	0	II	13334512	T	TT/GT	1	GT/GT	2.2e-08	0	0	0	33	0	0	6	15	33	21	T>G	CACTTGC	No_gene	No_gene
CD0001a	N2	None	0	II	13334523	A	AA/AG	1	AG/AG	3.1e-09	36	0	0	0	14	0	14	0	36	28	T>C	ACGTAGA	No_gene	No_gene
CD0001a	N2	None	0	II	13334540	T	TT/CT	1	CT/CT	2.1e-10	0	0	0	40	0	17	0	10	40	27	T>C	AAATGCG	No_gene	No_gene
CD0001a	N2	None	0	V	18982871	C	CC/CT	1	CT/CT	5.7e-11	0	42	0	0	0	29	0	20	42	49	C>T	CTGCTAA	Y39B6A.39	Non-transcribed
CD0001a	N2	None	0	V	19417262	C	CC/TT	1	CT/TT	1.5e-11	0	44	0	0	0	0	0	44	44	44	C>T	ATGCCAT	C25F9.9	Non-transcribed
CD0001a	N2	None	0	IV	13008176	G	GG/GT	1	GT/GT	7.1e-14	0	0	52	0	0	0	25	25	52	50	C>A	AAGCCTA	No_gene	No_gene
CD0001c	N2	None	0	I	2800626	G	GG/AA	1	AG/AA	4.7e-06	0	0	25	0	53	0	0	0	25	53	C>T	GGGCAGC	No_gene	No_gene
CD0001c	N2	None	0	I	2332521	G	GG/AA	1	AG/AA	6.6e-07	0	0	28	0	31	0	0	0	28	31	C>T	GGTCGCC	Y39G10AR.16	Non-transcribed
CD0001c	N2	None	0	I	13048138	T	TT/GG	1	GT/GG	2.9e-11	0	0	0	43	0	0	50	0	43	50	T>G	GCTTAGA	No_gene	No_gene
CD0001c	N2	None	0	V	8221210	C	CC/AA	0.99	CC/AC	0.0066	0	41	0	0	7	0	0	0	41	7	C>A	ATTCTGC	K07C11.9	Transcribed
CD0001c	N2	None	0	V	8221211	T	TT/CC	0.99	TT/CT	0.013	0	0	0	42	0	6	0	0	42	6	T>C	TTCTGCG	K07C11.9	Transcribed
CD0001c	N2	None	0	X	10647732	G	GG/CC	1	CG/CC	6.8e-05	0	0	21	0	0	42	0	0	21	42	C>G	CTACGAT	F11A1.3	Transcribed
CD0001d	N2	None	0	III	12530727	C	CC/CG	1	CG/CG	6.8e-05	0	21	0	0	0	23	13	0	21	36	C>G	TAGCTAG	Y111B2A.25	Non-transcribed
CD0001d	N2	None	0	III	9109320	T	TT/AA	1	AT/AA	9.8e-06	1	0	0	37	36	0	0	0	38	36	T>A	TTTTAAT	No_gene	No_gene
CD0001d	N2	None	0	X	16147106	A	AA/GG	1	AG/GG	8.1e-10	38	0	0	0	0	0	60	0	38	60	T>C	CTATCCG	No_gene	No_gene
CD0001d	N2	None	0	X	17093408	C	CC/AA	1	CC/AC	1.8e-09	0	49	0	0	28	0	0	0	49	28	C>A	CTCCAAC	C08A9.1	Non-transcribed
CD0001d	N2	None	0	X	5807145	C	CC/TT	1	CT/TT	1.7e-07	0	30	0	0	0	0	0	36	30	36	C>T	ACGCCTC	No_gene	No_gene
CD0001d	N2	None	0	X	2370295	C	CC/AA	1	AC/AA	2.1e-10	1	52	0	0	54	0	0	0	53	54	C>A	TTTCCTG	No_gene	No_gene
CD0001d	N2	None	0	II	5971717	T	TT/CC	1	CT/CC	4.1e-10	0	0	0	39	0	52	0	0	39	52	T>C	TTTTATG	B0034.1	Non-transcribed
CD0001d	N2	None	0	V	9366577	C	CC/AA	1	CC/AC	5.8e-12	0	50	0	0	36	0	0	0	50	36	C>A	TGACGAA	No_gene	No_gene
CD0001d	N2	None	0	IV	11124767	G	GG/AA	1	AG/AA	8e-10	0	0	38	0	52	0	0	0	38	52	C>T	TATCAAA	T05E11.4	Non-transcribed
CD0002a	ung-1	None	0	III	12520375	C	CC/TT	1	CT/TT	7.5e-12	0	45	0	0	0	0	0	37	45	37	C>T	CGTCCTT	Y111B2A.4	Non-transcribed
CD0002a	ung-1	None	0	III	5254752	C	CC/TT	1	CT/TT	1.8e-14	0	54	0	0	0	0	0	49	54	49	C>T	GTACAAT	C34E10.3	Non-transcribed
CD0002a	ung-1	None	0	III	9575963	C	CC/TT	1	CT/TT	7.4e-12	0	45	0	0	0	0	0	45	45	45	C>T	CCACAGT	C48B4.4	Transcribed
CD0002a	ung-1	None	0	I	2340524	G	GG/AA	1	AG/AA	5.3e-13	0	0	49	0	40	0	0	0	49	40	C>T	TTGCTAA	No_gene	No_gene
CD0002a	ung-1	None	0	I	14169605	T	TT/AT	1	AT/AT	1.8e-05	0	0	0	23	21	0	0	18	23	39	T>A	ATTTAAA	No_gene	No_gene
CD0002a	ung-1	None	0	II	2087933	G	GG/AA	1	AG/AA	2e-12	0	0	47	0	45	0	0	0	47	45	C>T	TTTCAAA	T16A1.7	Non-transcribed
CD0002a	ung-1	None	0	X	13731722	C	CC/TT	1	CT/TT	3.6e-14	0	53	0	0	0	0	0	51	53	51	C>T	GAACGAT	K11E4.4	Non-transcribed
CD0002a	ung-1	None	0	X	10368723	A	AA/AG	0.99	AA/AA	0.012	16	0	0	0	12	0	3	0	16	15	T>C	TTTTACT	No_gene	No_gene
CD0002a	ung-1	None	0	X	10542649	C	CC/TT	1	CC/CT	6.7e-18	0	67	0	0	0	0	0	55	67	55	C>T	TGTCGTT	No_gene	No_gene
CD0002a	ung-1	None	0	X	5550834	G	GG/AG	1	AG/AG	2e-12	0	0	47	0	21	0	26	0	47	47	C>T	TGGCTGA	C54G7.4	Non-transcribed
CD0002a	ung-1	None	0	V	18824416	T	TT/AA	1	AT/AA	2.8e-11	0	0	0	43	49	0	0	0	43	49	T>A	AAATAAT	No_gene	No_gene
CD0002a	ung-1	None	0	IV	4948842	C	CC/AC	1	AC/AC	3.6e-14	0	53	0	0	24	21	0	0	53	45	C>A	CTTCATG	No_gene	No_gene
CD0002c	ung-1	None	0	II	4397178	T	TT/AA	1	AT/AA	5.5e-11	0	0	0	42	60	0	0	0	42	60	T>A	TTCTGTA	ZK430.8	Non-transcribed
CD0002c	ung-1	None	0	II	7778535	C	CC/TT	1	CT/TT	3.6e-14	0	53	0	0	0	0	0	53	53	53	C>T	AAACTAA	No_gene	No_gene
CD0002c	ung-1	None	0	IV	9697279	G	GG/AA	1	AG/AA	3.8e-12	0	0	46	0	50	0	0	0	46	50	C>T	CAGCTCT	ZK1251.9	Non-transcribed
CD0002c	ung-1	None	0	IV	10878240	G	GG/TT	1	GT/TT	7.5e-12	0	0	45	0	0	0	0	55	45	55	C>A	TATCTTC	F13E9.6	Non-transcribed
CD0002c	ung-1	None	0	IV	1912190	T	TT/AA	1	AT/AA	4.1e-10	0	0	0	39	48	0	0	0	39	48	T>A	ATTTAAA	F55A8.1	Non-transcribed
CD0002c	ung-1	None	0	III	6642694	G	GG/AG	1	AG/AG	2.6e-13	0	0	50	0	24	0	25	0	50	49	C>T	ATCCTCT	C13B9.4	Non-transcribed
CD0002c	ung-1	None	0	III	1638810	T	TT/AA	1	AT/AA	1.4e-13	0	0	0	51	48	0	0	0	51	48	T>A	AGCTAAT	No_gene	No_gene
CD0002c	ung-1	None	0	V	3094241	C	CC/TT	1	CT/TT	9.6e-15	0	55	0	0	0	0	0	52	55	52	C>T	CGGCCGC	C50H11.15	Transcribed
CD0002d	ung-1	None	0	IV	13142586	C	CC/TT	1	CC/CT	3.2e-08	0	53	0	0	0	0	0	24	53	24	C>T	CCACAGT	No_gene	No_gene
CD0002d	ung-1	None	0	X	1131503	C	CC/TT	1	CC/CT	3.7e-09	0	48	0	0	0	0	0	27	48	27	C>T	TTCCAGC	C05D9.1	Non-transcribed
CD0002d	ung-1	None	0	X	3302042	G	GG/CC	1	GG/CG	2.4e-06	0	0	51	0	0	18	0	0	51	18	C>G	AAACCGA	No_gene	No_gene
CD0002d	ung-1	None	0	V	17078084	T	TT/AA	1	TT/AT	4.3e-10	0	0	0	40	30	0	0	0	40	30	T>A	TGGTGAA	No_gene	No_gene
CD0002d	ung-1	None	0	V	12892195	T	TT/AA	1	TT/AT	2.1e-10	0	0	0	41	31	0	0	0	41	31	T>A	GCATTTT	R90.1	Transcribed
CD0002d	ung-1	None	0	V	13955839	G	GG/AA	1	GG/AG	1.2e-06	0	0	35	0	19	0	0	0	35	19	C>T	CGGCAAA	R10D12.9	Transcribed
CD0002d	ung-1	None	0	III	10535685	C	CC/TT	1	CC/CT	2.4e-11	0	50	0	0	0	0	0	34	50	34	C>T	ATTCAGA	T21C12.2	Non-transcribed
CD0002d	ung-1	None	0	III	7638911	C	CC/TT	1	CC/CT	6.6e-08	0	51	0	0	0	0	0	23	51	23	C>T	TTTCAGT	ZK783.1	Non-transcribed
CD0002d	ung-1	None	0	III	5311948	C	CC/TT	1	CT/TT	3e-09	0	36	0	0	0	0	0	32	36	32	C>T	TTCCGGT	F52C9.8	Non-transcribed
CD0002d	ung-1	None	0	III	1375415	C	CC/TT	1	CC/CT	9.1e-10	0	38	0	0	0	0	0	29	38	29	C>T	GCGCTCA	Y82E9BR.20	Non-transcribed
CD0002d	ung-1	None	0	II	11991669	C	CC/CT	1	CT/CT	5.7e-11	0	42	0	0	0	19	0	15	42	34	C>T	ATCCATT	Y17G7B.3	Non-transcribed
CD0003a	cep-1	None	0	I	825258	C	CC/TT	1	CT/TT	0.00026	0	19	0	0	0	0	0	57	19	57	C>T	AACCGAA	ZC123.3	Non-transcribed
CD0003a	cep-1	None	0	IV	9347917	C	CC/CT	1	CT/CT	0.0019	0	16	0	0	0	37	0	36	16	73	C>T	CTCCCGA	T20D3.11	Transcribed
CD0003a	cep-1	None	0	V	11661733	A	AA/GG	1	AG/GG	2.2e-08	33	0	0	0	0	0	86	0	33	86	T>C	TTTTTTT	F46F3.1	Non-transcribed
CD0003a	cep-1	None	0	V	8382142	T	TT/AA	1	AT/AA	3.2e-07	0	0	0	29	61	0	0	0	29	61	T>A	TGATATA	F52E1.5	Non-transcribed
CD0003a	cep-1	None	0	V	8382158	C	CC/TT	1	CT/TT	3.4e-06	0	30	0	1	0	0	0	61	31	61	C>T	TTACCCA	F52E1.5	Non-transcribed
CD0003a	cep-1	None	0	V	16105020	A	AA/GG	1	AG/GG	6.1e-09	35	0	0	0	0	1	71	0	35	72	T>C	GGGTATC	F44G3.2	Transcribed
CD0003c	cep-1	None	0	I	13650478	T	TT/AA	1	AT/AA	8.5e-08	0	0	0	31	36	0	0	0	31	36	T>A	TTTTAAT	No_gene	No_gene
CD0003c	cep-1	None	0	II	13609234	T	TT/GG	1	GT/GG	6.4e-07	0	0	0	28	0	0	35	0	28	35	T>G	ACGTCAC	Y48E1B.10	Transcribed
CD0003c	cep-1	None	0	II	10831687	T	TT/AA	1	AT/AA	6.3e-07	0	0	0	28	38	0	0	0	28	38	T>A	TTTTAAA	M106.1	Non-transcribed
CD0003c	cep-1	None	0	II	7598277	A	AA/TT	1	AT/TT	5.7e-08	32	0	1	0	0	0	0	46	33	46	T>A	TTTTAAA	R07G3.5	Non-transcribed
CD0003c	cep-1	None	0	III	10891030	G	GG/CC	1	CG/CC	5.7e-05	0	0	21	1	0	38	0	0	22	38	C>G	TTTCCTC	C44B9.4	Transcribed
CD0003c	cep-1	None	0	III	1416822	T	TT/AA	1	AT/AA	1.7e-07	0	0	0	30	25	0	0	0	30	25	T>A	TTTTAAT	Y82E9BR.15	Transcribed
CD0003c	cep-1	None	0	III	7328355	T	TT/GG	1	GT/GG	6.4e-07	0	0	0	28	0	0	43	0	28	43	T>G	TAATGCT	F56C9.11	Transcribed
CD0003c	cep-1	None	0	V	8969430	C	CC/TT	1	CT/TT	4.1e-10	0	39	0	0	0	0	0	38	39	38	C>T	ATACCTT	F59E11.8	Transcribed
CD0003c	cep-1	None	0	IV	4277299	T	TT/CC	1	CT/CC	3e-09	0	0	0	36	0	48	0	0	36	48	T>C	TTTTCCG	F36A4.14	Transcribed
CD0003d	cep-1	None	0	I	6729972	A	AA/TT	1	AT/TT	1.1e-10	41	0	0	0	0	0	0	41	41	41	T>A	TTTTAAA	W02D3.6	Non-transcribed
CD0003d	cep-1	None	0	I	1123289	C	CC/AC	1	AC/AC	1.7e-07	0	30	0	0	11	21	0	0	30	32	C>A	AGCCGAA	No_gene	No_gene
CD0003d	cep-1	None	0	I	1123290	G	GG/AG	1	AG/AG	1.7e-07	0	0	30	0	11	0	21	0	30	32	C>T	TTTCGGC	No_gene	No_gene
CD0003d	cep-1	None	0	I	11847325	A	AA/CC	1	AC/CC	1.2e-08	34	0	0	0	0	40	0	0	34	40	T>G	ATTTTTT	Y47H9C.2	Transcribed
CD0003d	cep-1	None	0	II	14055643	G	GG/TT	1	GT/TT	3.3e-07	0	0	29	0	0	0	0	34	29	34	C>A	TTTCTTA	No_gene	No_gene
CD0003d	cep-1	None	0	III	220939	T	TT/AT	1	AT/AT	4.1e-10	0	0	0	39	13	0	0	20	39	33	T>A	TTTTAAA	No_gene	No_gene
CD0003d	cep-1	None	0	III	6219197	C	CC/TT	1	CT/TT	5.5e-11	0	42	0	0	0	0	0	41	42	41	C>T	GTACAGA	No_gene	No_gene
CD0003d	cep-1	None	0	IV	14642169	A	AA/TT	1	AT/TT	3.2e-07	29	0	0	0	0	0	0	35	29	35	T>A	TGGTTTT	Y57G11C.302	Non-transcribed
CD0003d	cep-1	None	0	X	6721200	G	GG/TT	1	GT/TT	2.4e-06	0	0	26	0	0	0	0	29	26	29	C>A	TTACAAA	K11G12.4	Non-transcribed
CD0003d	cep-1	None	0	X	3559691	C	CC/TT	0.75	CC/CT	0.18	0	17	0	0	0	0	0	2	17	2	C>T	TTTCCGT	F59D8.2	Transcribed
CD0003d	cep-1	None	0	X	3560187	C	CC/GG	1	CC/CG	8.7e-05	0	25	0	0	0	0	13	0	25	13	C>G	ACTCTGG	F59D8.2	Transcribed
CD0003d	cep-1	None	0	X	8722195	C	CC/TT	1	CT/TT	2.9e-11	0	43	0	0	0	0	0	40	43	40	C>T	AGGCGGC	F53A9.10	Transcribed
CD0004a	xpa-1	None	0	I	9151830	G	GG/TT	1	GG/GT	1.7e-09	0	0	39	0	0	0	1	42	39	43	C>A	TACCATG	H32K16.1	Transcribed
CD0004a	xpa-1	None	0	II	1646663	T	TT/AA	1	AT/AA	4.4e-08	0	0	0	32	56	0	0	0	32	56	T>A	TGCTTTC	ZC204.16	Transcribed
CD0004a	xpa-1	None	0	II	332305	A	AA/TT	1	AT/TT	1.2e-06	27	0	0	0	0	0	0	55	27	55	T>A	ACGTGTC	K01A2.11	Non-transcribed
CD0004a	xpa-1	None	0	II	7988646	A	AA/GG	1	AG/GG	5.5e-11	42	0	0	0	0	0	40	0	42	40	T>C	TATTAAA	DH11.5	Transcribed
CD0004a	xpa-1	None	0	II	14974951	A	AA/TT	1	AT/TT	3e-09	36	0	0	0	0	0	0	34	36	34	T>A	ATTTAAA	Y53F4B.4	Transcribed
CD0004a	xpa-1	None	0	III	9555492	G	GG/AG	1	AG/AG	8.6e-08	0	0	31	0	26	0	23	0	31	49	C>T	TTCCAGT	ZK1098.10	Transcribed
CD0004a	xpa-1	None	0	III	6289882	C	CC/AA	1	AC/AA	1.5e-09	0	37	0	0	46	0	0	0	37	46	C>A	GCACAAA	No_gene	No_gene
CD0004a	xpa-1	None	0	IV	11708937	C	CC/AA	1	AC/AA	1.1e-08	0	34	0	0	39	1	0	0	34	40	C>A	TCACCCG	No_gene	No_gene
CD0004a	xpa-1	None	0	IV	14098517	T	TT/AA	1	TT/AT	4.3e-05	0	0	0	35	14	0	0	0	35	14	T>A	AGCTCCT	F52B11.4	Transcribed
CD0004a	xpa-1	None	0	V	1947280	A	AA/AT	1	AT/AT	3e-09	36	0	0	0	26	0	0	23	36	49	T>A	ATTTAAA	T06A1.4	Transcribed
CD0004a	xpa-1	None	0	V	15594342	A	AA/TT	1	AT/TT	4.1e-10	39	0	0	0	0	0	0	47	39	47	T>A	AATTCCA	No_gene	No_gene
CD0004a	xpa-1	None	0	V	16078068	G	GG/CC	1	CG/CC	2.4e-06	0	0	26	0	0	40	1	0	26	41	C>G	ACCCAGA	F22B8.2	Transcribed
CD0004a	xpa-1	None	0	V	9217801	T	TT/GG	0.9	TT/GT	0.1	0	0	0	41	0	0	3	0	41	3	T>G	TTGTCAA	No_gene	No_gene
CD0004a	xpa-1	None	0	V	13787828	G	GG/GT	1	GT/GT	3.2e-07	0	0	29	0	0	0	16	16	29	32	C>A	AATCAAA	F53C11.5	Transcribed
CD0004a	xpa-1	None	0	V	11415630	G	GG/TT	1	GT/TT	1.1e-08	0	0	34	0	0	0	0	49	34	49	C>A	CAACTTC	T26H10.1	Non-transcribed
CD0004c	xpa-1	None	0	II	242723	C	CC/TT	1	CC/CT	2.4e-06	0	33	0	0	0	0	0	18	33	18	C>T	ATACATA	Y43H11AL.3	Transcribed
CD0004c	xpa-1	None	0	II	1092991	A	AA/AT	1	AT/AT	4.7e-06	25	0	0	0	9	0	0	13	25	22	T>A	TTTTAGT	T13B5.1	Transcribed
CD0004c	xpa-1	None	0	III	4619307	C	CC/AA	1	AC/AA	6.8e-05	0	21	0	0	25	0	0	0	21	25	C>A	GATCTGA	F10F2.2	Transcribed
CD0004c	xpa-1	None	0	IV	6316613	C	CC/TT	1	CT/TT	4.7e-06	0	25	0	0	0	0	0	27	25	27	C>T	TTTCTGA	No_gene	No_gene
CD0004c	xpa-1	None	0	IV	7613055	C	CC/TT	1	CT/TT	2.4e-06	0	26	0	0	0	0	0	20	26	20	C>T	CAACCTC	F45E4.4	Non-transcribed
CD0004c	xpa-1	None	0	IV	10697875	A	AA/TT	1	AA/AT	5.7e-07	31	0	0	0	0	0	0	20	31	20	T>A	TTTTTTT	No_gene	No_gene
CD0004c	xpa-1	None	0	IV	11317747	C	CC/AA	1	CC/AC	5e-06	0	29	0	0	17	0	0	0	29	17	C>A	GTGCTTT	B0035.5	Non-transcribed
CD0004c	xpa-1	None	0	X	7756132	A	AA/AG	1	AG/AG	1.2e-08	34	0	0	0	11	0	8	0	34	19	T>C	CATTTAA	No_gene	No_gene
CD0004c	xpa-1	None	0	X	8844915	A	AA/AT	1	AT/AT	9.1e-06	24	0	0	0	10	0	0	8	24	18	T>A	TTTTAAA	C28G1.1	Transcribed
CD0004c	xpa-1	None	0	I	10686661	A	AA/GG	1	AA/AG	1.8e-09	39	0	0	0	0	0	28	0	39	28	T>C	ATATAAC	C34B2.8	Non-transcribed
CD0004d	xpa-1	None	0	III	11974111	A	AA/CC	1	AA/AC	2.4e-11	51	0	0	0	0	34	0	0	51	34	T>G	CATTTTT	Y56A3A.30	Non-transcribed
CD0004d	xpa-1	None	0	III	1500954	A	AA/TT	1	AT/TT	4.7e-06	25	0	0	0	0	0	0	36	25	36	T>A	TTTTCAA	M01G5.1	Transcribed
CD0004d	xpa-1	None	0	III	7471963	G	GG/AG	1	AG/AG	6.3e-07	0	0	28	0	30	1	14	0	28	45	C>T	TTACCAT	No_gene	No_gene
CD0004d	xpa-1	None	0	I	4740136	A	AA/GG	1	AG/GG	8.5e-08	31	0	0	0	0	0	35	0	31	35	T>C	TTTTGAA	C10H11.9	Non-transcribed
CD0004d	xpa-1	None	0	I	5025927	T	TT/CT	1	CT/CT	1.2e-08	0	0	0	34	0	11	0	21	34	32	T>C	TTGTCTT	C46H11.4	Non-transcribed
CD0004d	xpa-1	None	0	I	5924645	G	GG/TT	1	GT/TT	4.7e-06	0	0	25	0	0	0	0	44	25	44	C>A	CATCAGG	B0207.5	Transcribed
CD0004d	xpa-1	None	0	II	8535316	G	GG/CC	1	CG/CC	6e-09	0	0	35	0	0	35	0	0	35	35	C>G	AACCACG	No_gene	No_gene
CD0004d	xpa-1	None	0	II	11597800	A	AA/AT	1	AT/AT	9.1e-06	24	0	0	0	33	0	0	27	24	60	T>A	CATTTCG	F07A11.3	Non-transcribed
CD0004d	xpa-1	None	0	II	9321024	C	CC/AA	1	AC/AA	6.4e-07	0	28	0	0	52	0	0	0	28	52	C>A	GTTCTCG	D2013.2	Non-transcribed
CD0004d	xpa-1	None	0	IV	2867649	G	GG/GT	1	GT/GT	1.2e-06	0	0	27	0	0	0	20	15	27	35	C>A	AAACTAA	No_gene	No_gene
CD0004d	xpa-1	None	0	IV	9740261	G	GG/AG	1	AG/AG	4.7e-06	0	0	25	0	19	0	20	0	25	39	C>T	GGGCCGA	C28D4.3	Non-transcribed
CD0004d	xpa-1	None	0	IV	7766409	C	CC/TT	1	CT/TT	9.2e-06	0	24	0	0	0	0	0	44	24	44	C>T	CCACCTG	C46A5.1	Non-transcribed
CD0004d	xpa-1	None	0	IV	7766410	C	CC/TT	1	CT/TT	4.7e-06	0	25	0	0	0	0	0	44	25	44	C>T	CACCTGT	C46A5.1	Non-transcribed
CD0004d	xpa-1	None	0	X	14079879	C	CC/AC	1	AC/AC	5.9e-09	0	35	0	0	25	21	0	0	35	46	C>A	AAACGCT	No_gene	No_gene
CD0004d	xpa-1	None	0	X	10553665	A	AA/GG	1	AG/GG	8.6e-08	31	0	0	0	0	0	35	0	31	35	T>C	ACATTTA	F59F5.6	Non-transcribed
CD0004d	xpa-1	None	0	X	7128608	A	AA/GG	1	AG/GG	6.3e-07	28	0	0	0	0	0	44	0	28	44	T>C	GCTTACT	No_gene	No_gene
CD0004d	xpa-1	None	0	V	17652548	C	CC/AA	1	AC/AA	0.0037	0	15	0	0	44	0	0	0	15	44	C>A	TATCATT	No_gene	No_gene
CD0004d	xpa-1	None	0	V	1678006	C	CC/CG	1	CG/CG	2.2e-08	0	33	0	0	0	19	18	0	33	37	C>G	TATCAAT	K04F1.3	Transcribed
CD0005a	fcd-2	None	0	III	142140	C	CC/TT	1	CT/TT	1.8e-05	0	23	0	0	0	0	0	39	23	39	C>T	TTACATT	T17A3.4	Transcribed
CD0005a	fcd-2	None	0	III	7754018	C	CC/TT	1	CT/TT	9.1e-06	0	24	0	0	0	1	0	35	24	36	C>T	TATCCCA	ZK112.7	Transcribed
CD0005a	fcd-2	None	0	X	7477338	G	GG/AG	1	AG/AG	9.2e-06	0	0	24	0	24	0	22	0	24	46	C>T	AGGCATA	No_gene	No_gene
CD0005a	fcd-2	None	0	I	13378660	T	TT/AA	0.99	AT/AA	0.0074	0	0	0	14	32	0	0	0	14	32	T>A	TCCTAAT	No_gene	No_gene
CD0005a	fcd-2	None	0	I	7648086	A	AA/GG	1	AG/GG	0.00026	19	0	0	0	0	0	46	0	19	46	T>C	TGATGGT	F26A3.8	Non-transcribed
CD0005a	fcd-2	None	0	I	3537243	G	GG/AA	0.97	AG/AA	0.027	0	0	12	0	42	0	0	0	12	42	C>T	CCACCTG	Y47G6A.5	Transcribed
CD0005c	fcd-2	None	0	I	14345265	G	GG/TT	1	GT/TT	1.7e-07	0	0	30	0	0	0	0	33	30	33	C>A	ATTCAGC	No_gene	No_gene
CD0005c	fcd-2	None	0	IV	2529047	T	TT/CT	1	CT/CT	6.9e-05	0	0	0	21	0	8	0	22	21	30	T>C	TAGTTTC	Y69A2AR.16	Non-transcribed
CD0005c	fcd-2	None	0	IV	2529117	C	CC/CT	1	CT/CT	0.00026	0	19	0	0	0	29	0	17	19	46	C>T	TTCCAAA	Y69A2AR.16	Non-transcribed
CD0005c	fcd-2	None	0	II	458562	T	TT/AA	0.99	AT/AA	0.0072	0	0	0	14	17	0	0	0	14	17	T>A	TTTTAAA	No_gene	No_gene
CD0005c	fcd-2	None	0	II	5649167	C	CC/TT	1	CT/TT	6.8e-05	0	21	0	0	0	0	0	30	21	30	C>T	TCTCGTT	F59E12.11	Transcribed
CD0005c	fcd-2	None	0	II	14934792	C	CC/TT	0.95	CT/TT	0.051	0	11	0	0	0	0	1	34	11	35	C>T	TAGCCAA	E01F3.1	Non-transcribed
CD0005c	fcd-2	None	0	III	11312102	A	AA/TT	1	AT/TT	0.0037	15	0	0	0	0	0	0	28	15	28	T>A	TTTTAAG	No_gene	No_gene
CD0005c	fcd-2	None	0	III	8140863	G	GG/AG	1	AG/AG	6.8e-05	0	0	21	0	24	0	17	0	21	41	C>T	TCGCACG	C14B9.8	Non-transcribed
CD0005c	fcd-2	None	0	X	14225479	C	CC/TT	1	CT/TT	0.00013	0	20	0	0	0	0	0	26	20	26	C>T	TATCGCC	No_gene	No_gene
CD0005c	fcd-2	None	0	X	7301079	G	GG/AA	1	AG/AA	0.00098	0	0	17	0	42	0	0	0	17	42	C>T	TTACACA	No_gene	No_gene
CD0005d	fcd-2	None	0	X	2663376	C	CC/GG	1	CG/GG	3.5e-05	0	22	0	0	0	0	56	0	22	56	C>G	AGTCAAA	F54G2.1	Transcribed
CD0005d	fcd-2	None	0	V	11407779	C	CC/GG	1	CG/GG	2.1e-10	0	40	0	0	0	0	52	0	40	52	C>G	TAGCGAA	K03B8.6	Non-transcribed
CD0005d	fcd-2	None	0	V	12831461	C	CC/GG	1	CG/GG	0.00098	0	17	0	0	0	0	62	0	17	62	C>G	CATCCAG	C44H9.2	Non-transcribed
CD0005d	fcd-2	None	0	IV	10811336	A	AA/CC	1	AC/CC	4.7e-06	25	0	0	0	0	45	0	0	25	45	T>G	TCTTATA	No_gene	No_gene
CD0005d	fcd-2	None	0	IV	1520627	C	CC/CT	1	CT/CT	4.7e-06	0	25	0	0	0	17	0	23	25	40	C>T	GGCCCAA	K03H6.4	Transcribed
CD0005d	fcd-2	None	0	II	11096328	C	CC/TT	1	CT/TT	0.0005	0	18	0	0	0	0	0	52	18	52	C>T	AACCTCT	C09H10.10	Transcribed
CD0005d	fcd-2	None	0	II	13359502	G	GG/TT	1	GG/GT	0.0015	0	0	17	0	0	0	0	9	17	9	C>A	CGGCAAT	No_gene	No_gene
CD0005d	fcd-2	None	0	II	13359512	T	TT/AA	0.67	TT/TT	0.17	0	0	0	15	2	0	0	0	15	2	T>A	AAATTTC	No_gene	No_gene
CD0005d	fcd-2	None	0	II	2733634	C	CC/AC	1	AC/AC	0.00026	0	19	0	0	18	26	0	0	19	44	C>A	CTACAGT	T05A8.5	Transcribed
CD0006a	lig-4	None	0	III	7264330	T	TT/AA	1	AT/AA	8e-10	0	0	0	38	44	0	0	1	38	45	T>A	TTTTAAA	B0361.4	Non-transcribed
CD0006a	lig-4	None	0	III	13199345	C	CC/AC	1	AC/AC	3.8e-12	0	46	0	0	30	34	0	0	46	64	C>A	TAACAAA	Y39E4B.12	Non-transcribed
CD0006a	lig-4	None	0	I	875178	G	GG/AA	1	AG/AA	8.8e-08	0	0	31	0	44	0	0	0	31	44	C>T	TTGCCGA	Y95B8A.10	Non-transcribed
CD0006a	lig-4	None	0	X	4053524	G	GG/AG	1	AG/AG	1.5e-06	1	0	39	0	22	0	48	1	40	71	C>T	CTACTTA	No_gene	No_gene
CD0006a	lig-4	None	0	X	4053544	G	GG/AG	1	AG/AG	0.00033	1	0	28	0	21	0	26	0	29	47	C>T	CTACTTA	No_gene	No_gene
CD0006a	lig-4	None	0	X	12425945	C	CC/CT	1	CT/CT	2.6e-13	0	50	0	0	0	26	0	26	50	52	C>T	AGTCACG	T24D3.2	Non-transcribed
CD0006a	lig-4	None	0	X	7746287	A	AA/AT	1	AT/AT	2.6e-13	50	0	0	0	29	0	0	26	50	55	T>A	ATTTTGA	C47C12.3	Transcribed
CD0006a	lig-4	None	0	IV	9826356	A	AA/AG	1	AG/AG	2.7e-13	50	0	0	0	13	0	22	0	50	35	T>C	GCATATC	W08D2.7	Transcribed
CD0006a	lig-4	None	0	V	11192803	G	GG/TT	1	GT/TT	7.6e-14	0	1	52	0	0	0	0	50	53	50	C>A	TTGCTAA	K10D6.1	Transcribed
CD0006c	lig-4	None	0	III	5618724	C	CC/TT	1	CC/CT	2.8e-07	0	54	0	0	0	0	0	21	54	21	C>T	TGTCTGG	No_gene	No_gene
CD0006c	lig-4	None	0	I	7765281	C	CC/AA	1	CC/AC	3.1e-06	0	48	0	0	31	1	0	0	48	32	C>A	AAGCATT	No_gene	No_gene
CD0006c	lig-4	None	0	X	1939757	A	AA/AG	1	AG/AG	2.1e-10	40	0	0	0	19	0	27	0	40	46	T>C	TTTTAAA	Y59E1A.1	Non-transcribed
CD0006c	lig-4	None	0	V	3577681	A	AA/GG	1	AA/AG	7.6e-09	39	0	0	0	0	0	26	0	39	26	T>C	TTCTGGT	No_gene	No_gene
CD0006d	lig-4	None	0	II	14223568	T	TT/GG	1	GT/GG	1.6e-09	0	0	0	37	0	0	46	0	37	46	T>G	GCTTGAG	Y48B6A.13	Transcribed
CD0006d	lig-4	None	0	IV	5303692	C	CC/TT	1	CT/TT	3.3e-10	1	39	0	0	0	0	0	43	40	43	C>T	GGACATG	No_gene	No_gene
CD0006d	lig-4	None	0	IV	2638097	C	CC/AA	1	AC/AA	2.7e-13	0	50	0	0	43	0	0	0	50	43	C>A	TCTCGAC	Y69A2AR.30	Transcribed
CD0006d	lig-4	None	0	III	13593737	C	CC/CT	1	CC/CC	0.0043	0	21	0	0	0	16	0	4	21	20	C>T	GTTCGAG	No_gene	No_gene
CD0006d	lig-4	None	0	III	12532761	T	TT/AA	1	AT/AA	1e-12	0	0	0	48	44	0	0	0	48	44	T>A	CAATTCC	Y111B2A.25	Non-transcribed
CD0007a	hel-308	None	0	IV	2150315	T	TT/GT	1	GT/GT	1.3e-15	0	0	0	58	2	0	8	10	58	20	T>G	AGTTTGA	No_gene	No_gene
CD0007a	hel-308	None	0	IV	2150316	T	TT/AT	1	AT/AT	2.5e-15	0	0	0	57	9	0	2	10	57	21	T>A	GTTTGAA	No_gene	No_gene
CD0007a	hel-308	None	0	IV	2155140	C	CC/CT	1	CT/CT	6.7e-08	1	31	0	0	0	8	0	10	32	18	C>T	TAACTGA	C54E4.3	Transcribed
CD0007a	hel-308	None	0	V	20219119	A	AA/AT	1	AT/AT	5.4e-11	47	0	0	1	20	0	0	8	48	28	T>A	TTTTAAA	No_gene	No_gene
CD0007a	hel-308	None	0	I	12467645	A	AA/AT	0.98	AA/AA	0.019	30	0	0	0	12	0	0	3	30	15	T>A	AACTTCT	No_gene	No_gene
CD0008d	trt-1	None	0	IV	1433911	G	GG/AA	0.99	AG/AA	0.014	0	0	13	0	47	0	0	0	13	47	C>T	TCTCCAT	Y77E11A.10	Non-transcribed
CD0008d	trt-1	None	0	V	8433699	G	GG/AA	1	AG/AA	9.3e-06	0	0	24	0	52	0	0	0	24	52	C>T	ACTCCAA	F52E1.13	Non-transcribed
CD0008d	trt-1	None	0	V	3161748	A	AA/CC	0.97	AC/CC	0.027	12	0	0	0	0	53	0	0	12	53	T>G	TGATTGA	No_gene	No_gene
CD0008e	trt-1	None	0	II	7883337	G	GG/CG	1	CG/CG	3.2e-07	0	0	29	0	0	32	38	0	29	70	C>G	TATCAAC	No_gene	No_gene
CD0008e	trt-1	None	0	III	5084873	T	TT/CT	0.93	TT/TT	0.064	0	0	0	16	0	4	0	14	16	18	T>C	TCTTCGG	F54D8.4	Transcribed
CD0008g	trt-1	None	0	II	11201193	G	GG/AG	1	AG/AG	0.00026	0	0	19	0	25	0	15	0	19	40	C>T	CAACTAC	No_gene	No_gene
CD0008g	trt-1	None	0	X	13270160	T	TT/CT	1	CT/CT	0.00026	0	0	0	19	0	20	0	20	19	40	T>C	GATTTTC	No_gene	No_gene
CD0009f	mrt-2	None	0	X	7861295	A	AA/CC	1	AA/AC	2.4e-06	44	0	0	0	0	18	0	0	44	18	T>G	AATTGCC	No_gene	No_gene
CD0009f	mrt-2	None	0	X	7861297	T	TT/AA	1	TT/AT	2.4e-06	0	0	0	44	18	0	0	0	44	18	T>A	CAATTTT	No_gene	No_gene
CD0009f	mrt-2	None	0	X	7861309	T	TT/AA	1	TT/AT	1e-05	0	0	0	40	16	0	0	0	40	16	T>A	CTGTTTT	No_gene	No_gene
CD0009f	mrt-2	None	0	X	6696579	A	AA/CC	0.9	AA/AC	0.1	43	0	0	0	0	3	0	0	43	3	T>G	TCGTCAA	F38B6.7	Non-transcribed
CD0009f	mrt-2	None	0	X	6696580	C	CC/AA	0.9	CC/AC	0.1	0	43	0	0	3	0	0	0	43	3	C>A	TGACGAC	F38B6.7	Transcribed
CD0009f	mrt-2	None	0	II	2076588	T	TT/AA	0.8	TT/AT	0.19	0	0	0	37	2	0	0	0	37	2	T>A	TACTGTG	F07E5.9	Transcribed
CD0009f	mrt-2	None	0	II	2076592	C	CC/TT	0.79	CC/CT	0.19	0	37	0	0	0	0	0	2	37	2	C>T	GTGCCAA	F07E5.9	Transcribed
CD0009f	mrt-2	None	0	I	1682056	T	TT/CC	0.99	TT/CT	0.013	0	0	0	34	0	6	0	0	34	6	T>C	TTTTGGT	Y71G12B.16	Non-transcribed
CD0009f	mrt-2	None	0	I	1682058	G	GG/CC	0.99	GG/CG	0.013	0	0	34	0	0	6	0	0	34	6	C>G	AAACCAA	Y71G12B.16	Transcribed
CD0009f	mrt-2	None	0	I	1682073	G	GG/AA	0.9	GG/AG	0.1	0	0	34	0	3	0	0	0	34	3	C>T	CATCTTT	Y71G12B.16	Transcribed
CD0009f	mrt-2	None	0	I	1682080	G	GG/AA	0.79	GG/AG	0.19	0	0	34	0	2	0	0	0	34	2	C>T	ACTCCCG	Y71G12B.16	Transcribed
CD0009f	mrt-2	None	0	III	12769784	C	CC/AA	1	CC/AC	2.8e-07	0	39	0	0	21	0	0	0	39	21	C>A	ATCCTTG	ZC482.9	Non-transcribed
CD0009f	mrt-2	None	0	III	4571638	C	CC/AA	1	CC/AC	8.8e-10	0	46	0	0	29	0	0	0	46	29	C>A	GAACTAA	F35G12.2	Non-transcribed
CD0009f	mrt-2	None	0	V	16577587	T	TT/GG	0.9	TT/GT	0.1	0	0	0	30	0	0	3	0	30	3	T>G	AAGTCCT	T03E6.1	Non-transcribed
CD0009f	mrt-2	None	0	V	16577652	A	AA/GG	0.95	AA/AG	0.053	36	0	0	0	0	0	4	0	36	4	T>C	AATTGTC	T03E6.1	Transcribed
CD0009f	mrt-2	None	0	V	18281879	C	CC/CT	1	CT/CT	1.4e-13	0	51	0	0	0	16	0	23	51	39	C>T	TGACGTC	No_gene	No_gene
CD0009f	mrt-2	None	0	V	10389960	T	TT/CT	1	CT/CT	9.7e-10	0	0	1	37	0	23	0	8	38	31	T>C	ATGTTAA	AC3.5	Non-transcribed
CD0009f	mrt-2	None	0	IV	12287385	G	GG/AG	1	AG/AG	7e-14	0	0	52	0	12	0	14	0	52	26	C>T	ATGCGCC	C42C1.10	Transcribed
CD0009h	mrt-2	None	0	III	3794685	T	TT/AA	1	TT/AT	1.8e-09	0	0	0	44	28	0	0	0	44	28	T>A	CCGTATA	T24A11.1	Transcribed
CD0009h	mrt-2	None	0	X	10378750	G	GG/AA	1	GG/AG	5e-11	0	0	46	0	33	0	0	0	46	33	C>T	TGTCAGA	No_gene	No_gene
CD0009h	mrt-2	None	0	X	2104919	A	AA/GG	1	AG/GG	2.4e-06	26	0	0	0	0	0	26	0	26	26	T>C	AACTTAA	No_gene	No_gene
CD0009h	mrt-2	None	0	X	356182	A	AA/GG	1	AG/GG	3e-09	36	0	0	0	0	0	33	0	36	33	T>C	CTGTTTC	C04E7.2	Transcribed
CD0009h	mrt-2	None	0	V	915268	T	TT/AT	1	AT/AT	2.2e-08	0	0	0	33	10	0	0	5	33	15	T>A	AAATTTT	H24K24.3	Non-transcribed
CD0009h	mrt-2	None	0	V	6429041	T	TT/GT	1	GT/GT	6.1e-09	0	0	0	35	0	0	14	10	35	24	T>G	TGCTATT	T05H4.13	Transcribed
CD0009h	mrt-2	None	0	V	16291654	G	GG/AA	1	AG/AA	1.2e-08	0	0	34	0	33	0	0	0	34	33	C>T	CATCAAT	F28G4.5	Transcribed
CD0009h	mrt-2	None	0	V	17675927	G	GG/CG	1	CG/CG	2.2e-08	0	0	33	0	0	16	16	0	33	32	C>G	CCCCCTT	F59A1.3	Non-transcribed
CD0009h	mrt-2	None	0	I	255297	A	AA/CC	1	AC/CC	3.3e-07	29	0	0	0	0	24	0	0	29	24	T>G	TTCTATT	Y48G1BM.9	Non-transcribed
CD0009h	mrt-2	None	0	I	276398	G	GG/AA	1	GG/AG	3.2e-08	0	0	46	0	24	0	0	0	46	24	C>T	ACCCCGT	No_gene	No_gene
CD0009h	mrt-2	None	0	I	1005411	C	CC/TT	1	CT/TT	3.2e-07	0	29	0	0	0	0	0	26	29	26	C>T	AATCGTT	C54G6.2	Non-transcribed
CD0009h	mrt-2	None	0	I	1881208	C	CC/GG	1	CC/CG	2.5e-06	0	34	0	0	0	1	31	0	34	32	C>G	CCCCCCC	Y71G12A.3	Non-transcribed
CD0009h	mrt-2	None	0	I	2104552	T	TT/CC	1	CT/CC	0.00055	1	0	0	18	0	20	0	0	19	20	T>C	CCCTTGA	Y37E3.15	Non-transcribed
CD0009h	mrt-2	None	0	I	11522382	G	GG/AG	1	AG/AG	1.7e-07	0	0	30	0	18	0	11	0	30	29	C>T	TAACGAC	F32B4.4	Transcribed
CD0009h	mrt-2	None	0	I	8573271	T	TT/GT	1	GT/GT	1.2e-08	0	0	0	34	0	0	13	12	34	25	T>G	AAATTTA	T01H8.2	Transcribed
CD0009h	mrt-2	None	0	II	3722235	A	AA/AC	0.93	AA/AA	0.074	43	1	0	0	25	7	0	0	44	32	T>G	GCGTGGG	C46E10.3	Transcribed
CD0009h	mrt-2	None	0	II	15009532	G	GG/AA	1	AG/AA	2.4e-06	0	0	26	0	26	0	0	0	26	26	C>T	AATCGAT	Y53F4B.9	Non-transcribed
CD0009h	mrt-2	None	0	IV	10648476	G	GG/TT	1	GT/TT	1.2e-06	0	0	27	0	0	0	0	24	27	24	C>A	AGACAAA	F56C4.3	Non-transcribed
CD0010a	N2	Aflatoxin	0	V	17356867	C	CC/AC	1	AC/AC	1.1e-10	0	41	0	0	23	32	0	0	41	55	C>A	ACCCATT	F47H4.2	Non-transcribed
CD0010a	N2	Aflatoxin	0	I	1620497	A	AA/GG	0.7	AA/AG	0.17	53	0	0	0	0	0	2	0	53	2	T>C	AAATTAT	No_gene	No_gene
CD0010a	N2	Aflatoxin	0	X	2150844	G	GG/CG	1	CG/CG	1.8e-05	0	0	23	0	0	6	12	0	23	18	C>G	TTTCGCC	No_gene	No_gene
CD0010a	N2	Aflatoxin	0	X	16322043	A	AA/AC	1	AC/AC	1e-12	48	0	0	0	30	20	0	0	48	50	T>G	AATTCTC	No_gene	No_gene
CD0010c	N2	Aflatoxin	0	V	4946996	T	TT/AA	1	TT/AT	1.6e-08	0	0	0	43	25	0	0	0	43	25	T>A	TTTTAAA	F26G5.11	Transcribed
CD0010c	N2	Aflatoxin	0	II	2603404	G	GG/CC	1	CG/CC	2.4e-06	0	0	26	0	0	32	0	0	26	32	C>G	CAACTCA	D2062.9	Non-transcribed
CD0010d	N2	Aflatoxin	0	II	14098606	A	AA/AC	1	AC/AC	3.8e-12	46	0	0	0	17	9	0	0	46	26	T>G	AAGTGTA	No_gene	No_gene
CD0010d	N2	Aflatoxin	0	IV	13418175	G	GG/AG	1	AG/AG	1.8e-14	0	0	54	0	25	0	20	0	54	45	C>T	GACCTGG	K09B11.1	Transcribed
CD0011a	xpa-1	Aflatoxin	0	V	19110377	A	AA/TT	0.79	AA/AT	0.19	19	0	0	0	0	0	0	2	19	2	T>A	ATATAAT	Y39B6A.14	Non-transcribed
CD0011a	xpa-1	Aflatoxin	0	V	11054891	A	AA/GG	1	AG/GG	4.2e-10	39	0	0	0	1	0	85	0	39	86	T>C	TTGTCAC	T04C12.7	Transcribed
CD0011a	xpa-1	Aflatoxin	0	III	7246816	T	TT/AT	1	AT/AT	1.9e-14	0	0	0	54	27	0	0	36	54	63	T>A	TTTTAAC	T21D11.1	Transcribed
CD0011c	xpa-1	Aflatoxin	0	I	12523488	A	AA/AC	1	AC/AC	0.00099	17	0	0	0	21	7	0	0	17	28	T>G	CGGTGGA	K11D2.4	Transcribed
CD0011c	xpa-1	Aflatoxin	0	I	12613900	C	CC/GG	1	CC/CG	1.6e-08	0	44	0	0	0	0	25	0	44	25	C>G	ACTCAAC	No_gene	No_gene
CD0011c	xpa-1	Aflatoxin	0	X	9370748	C	CC/AA	1	CC/AC	3.2e-08	0	34	0	0	24	0	0	0	34	24	C>A	TTTCTCA	E01H11.1	Non-transcribed
CD0011c	xpa-1	Aflatoxin	0	X	7250735	G	GG/GT	0.95	GG/GG	0.05	0	0	47	0	0	0	12	5	47	17	C>A	AGCCAAA	F46H5.4	Non-transcribed
CD0011c	xpa-1	Aflatoxin	0	IV	1136260	A	AA/GG	1	AA/AG	2.4e-06	51	0	0	0	0	0	18	0	51	18	T>C	TTTTAAG	No_gene	No_gene
CD0011c	xpa-1	Aflatoxin	0	III	880569	G	GG/CC	1	CG/CC	1.7e-07	0	0	30	0	0	23	0	0	30	23	C>G	ATGCTTG	T24C4.1	Transcribed
CD0011c	xpa-1	Aflatoxin	0	III	6392455	A	AA/AT	1	AT/AT	5.2e-13	49	0	0	0	9	0	0	17	49	26	T>A	GAGTTCC	C16A3.1	Transcribed
CD0011c	xpa-1	Aflatoxin	0	V	13459123	C	CC/CT	1	CT/CT	2e-12	0	47	0	0	0	11	0	9	47	20	C>T	ATGCTAA	F25H9.2	Non-transcribed
CD0011c	xpa-1	Aflatoxin	0	V	9128120	G	GG/AA	1	AG/AA	2.8e-11	0	0	43	0	39	0	0	0	43	39	C>T	ACTCACA	No_gene	No_gene
CD0011c	xpa-1	Aflatoxin	0	V	16358401	G	GG/AG	1	AG/AG	1e-12	0	0	48	0	15	0	6	0	48	21	C>T	CTCCATT	W08G11.4	Transcribed
CD0011c	xpa-1	Aflatoxin	0	V	16358402	G	GG/AG	1	AG/AG	5.2e-13	0	0	49	0	15	0	6	0	49	21	C>T	ACTCCAT	W08G11.4	Transcribed
CD0011c	xpa-1	Aflatoxin	0	V	16155144	C	CC/AA	1	CC/AC	2.4e-06	0	67	0	0	18	0	0	0	67	18	C>A	CGCCATT	No_gene	No_gene
CD0011d	xpa-1	Aflatoxin	0	I	13900567	T	TT/CC	1	TT/CT	2.4e-06	0	0	0	44	0	18	0	0	44	18	T>C	TTTTTTT	Y71A12B.4	Non-transcribed
CD0011d	xpa-1	Aflatoxin	0	I	1015546	T	TT/GT	0.81	TT/TT	0.19	0	0	1	32	0	0	5	15	33	20	T>G	GGGTGGA	No_gene	No_gene
CD0011d	xpa-1	Aflatoxin	0	III	12744664	C	CC/CT	1	CT/CT	3.6e-14	0	53	0	0	0	14	0	9	53	23	C>T	TTCCATG	No_gene	No_gene
CD0011d	xpa-1	Aflatoxin	0	X	16168707	C	CC/AA	1	CC/AC	4.3e-05	0	46	0	0	14	0	0	0	46	14	C>A	CCACAAA	No_gene	No_gene
CD0012a	csb-1	Aflatoxin	0	II	15267345	G	GG/TT	1	GT/TT	8.1e-10	0	0	38	0	0	0	1	58	38	59	C>A	GAACAAA	No_gene	No_gene
CD0012a	csb-1	Aflatoxin	0	I	13479871	T	TT/CC	0.8	TT/CT	0.19	0	0	0	24	0	2	0	0	24	2	T>C	TTTTTCG	Y48G10A.2	Transcribed
CD0012a	csb-1	Aflatoxin	0	I	11370170	T	TT/CC	0.77	TT/CT	0.18	0	0	0	36	0	2	0	0	36	2	T>C	GGCTTAA	F56G4.6	Transcribed
CD0012a	csb-1	Aflatoxin	0	I	6488463	A	AA/TT	1	AA/AT	4.3e-10	43	0	0	0	0	0	0	30	43	30	T>A	TTTTAAA	K06A5.8	Non-transcribed
CD0012c	csb-1	Aflatoxin	0	X	3289374	G	GG/GT	1	GG/TT	4.9e-09	0	0	52	0	0	0	5	39	52	44	C>A	TGCCCTT	No_gene	No_gene
CD0012c	csb-1	Aflatoxin	0	III	1943998	G	GG/AA	0.79	GG/AG	0.19	0	0	29	0	2	0	0	0	29	2	C>T	ACCCAAA	No_gene	No_gene
CD0012c	csb-1	Aflatoxin	0	I	1614592	C	CC/CT	1	CT/CT	8e-10	0	38	0	0	0	18	0	18	38	36	C>T	AAACAGG	Y73E7A.9	Non-transcribed
CD0012d	csb-1	Aflatoxin	0	V	19354197	C	CC/AA	0.76	CC/AC	0.18	0	48	0	0	2	0	0	0	48	2	C>A	TGTCACT	No_gene	No_gene
CD0012d	csb-1	Aflatoxin	0	I	1317387	C	CC/AA	1	AC/AA	3.8e-12	0	46	0	0	45	0	0	0	46	45	C>A	TTACCTT	K12C11.4	Non-transcribed
CD0013a	xpc-1	Aflatoxin	0	X	5739649	G	GG/AG	1	AG/AG	1.1e-10	0	0	41	0	31	0	28	0	41	59	C>T	GCTCCAG	C41G11.4	Non-transcribed
CD0013a	xpc-1	Aflatoxin	0	V	20420119	C	CC/AA	1	AC/AA	2.8e-11	0	43	0	0	60	0	0	0	43	60	C>A	ACTCGAG	No_gene	No_gene
CD0013a	xpc-1	Aflatoxin	0	V	6206920	C	CC/CT	1	CT/CT	3.8e-12	0	46	0	0	0	34	0	31	46	65	C>T	TTGCTCA	W06H8.2	Non-transcribed
CD0013c	xpc-1	Aflatoxin	0	IV	10094035	C	CC/AC	1	AC/AC	7.5e-12	0	45	0	0	36	29	0	0	45	65	C>A	GAACTCT	No_gene	No_gene
CD0013c	xpc-1	Aflatoxin	0	II	13545281	A	AA/TT	0.7	AA/AT	0.17	33	0	0	0	0	0	0	2	33	2	T>A	GTTTAAA	Y48E1B.1	Non-transcribed
CD0013d	xpc-1	Aflatoxin	0	IV	10649476	C	CC/CT	1	CT/CT	1e-12	0	48	0	0	0	37	0	14	48	51	C>T	TGGCTGG	F56C4.3	Transcribed
CD0013d	xpc-1	Aflatoxin	0	II	8995602	C	CC/TT	0.99	CC/CT	0.0052	0	41	0	0	0	4	0	56	41	60	C>T	CGTCTTG	F44G4.1	Non-transcribed
CD0013d	xpc-1	Aflatoxin	0	II	9305187	A	AA/AT	1	AT/AT	5.5e-11	42	0	0	0	25	0	0	19	42	44	T>A	GGTTTTT	C01G6.8	Non-transcribed
CD0013d	xpc-1	Aflatoxin	0	II	5100221	C	CC/GG	1	CC/CG	1.9e-09	0	40	0	0	0	1	41	0	40	42	C>G	GGCCCGA	C04G6.6	Transcribed
CD0014a	xpf-1	Aflatoxin	0	II	2733398	T	TT/CT	1	CT/CT	1.1e-10	0	0	0	41	0	25	0	33	41	58	T>C	CAGTAAG	T05A8.5	Transcribed
CD0014a	xpf-1	Aflatoxin	0	V	16175306	C	CC/CT	1	CT/CT	1.6e-09	0	37	0	0	0	22	0	28	37	50	C>T	TTTCTCC	K05D4.4	Transcribed
CD0014a	xpf-1	Aflatoxin	0	III	11112787	G	GG/AG	1	AG/AG	1.7e-07	0	0	30	0	24	0	23	0	30	47	C>T	TCACTTT	Y48A6C.2	Non-transcribed
CD0014a	xpf-1	Aflatoxin	0	III	1744482	A	AA/AT	1	AT/AT	8.1e-10	38	0	0	0	22	0	0	25	38	47	T>A	GAATAGC	No_gene	No_gene
CD0014a	xpf-1	Aflatoxin	0	IV	3530548	G	GG/AG	1	AG/AG	5.5e-11	0	0	42	0	13	0	18	0	42	31	C>T	TCTCCAA	M57.2	Transcribed
CD0014c	xpf-1	Aflatoxin	0	X	7479761	C	CC/AC	1	AC/AC	1.4e-13	0	51	0	0	36	40	0	0	51	76	C>A	CTACTTG	K08A8.1	Non-transcribed
CD0014c	xpf-1	Aflatoxin	0	II	2419116	C	CC/CT	1	CT/CT	2.4e-07	1	29	0	0	0	27	0	37	30	64	C>T	TCTCAGT	No_gene	No_gene
CD0014c	xpf-1	Aflatoxin	0	II	8832710	A	AA/AC	1	AC/AC	3.6e-14	53	0	0	0	14	24	0	0	53	38	T>G	ATTTTTT	No_gene	No_gene
CD0014c	xpf-1	Aflatoxin	0	IV	14065451	C	CC/CT	1	CT/CT	2.8e-11	0	43	0	0	0	29	0	35	43	64	C>T	AGCCTGA	Y37A1B.2	Transcribed
CD0014c	xpf-1	Aflatoxin	0	V	5121002	A	AA/TT	0.8	AA/AT	0.19	41	0	0	0	0	0	0	2	41	2	T>A	ATATATC	C04F5.1	Transcribed
CD0014d	xpf-1	Aflatoxin	0	III	8701927	G	GG/AG	1	AG/AG	1.3e-15	0	0	58	0	21	0	24	0	58	45	C>T	ATCCATC	B0303.9	Transcribed
CD0014d	xpf-1	Aflatoxin	0	V	11923052	G	GG/AG	1	AG/AG	2e-12	0	0	47	0	18	0	19	0	47	37	C>T	TATCCTA	R31.2	Transcribed
CD0014d	xpf-1	Aflatoxin	0	V	4846566	C	CC/AA	0.85	CC/AC	0.15	0	33	0	0	56	4	0	0	33	60	C>A	CAACACC	C37H5.3	Non-transcribed
CD0014d	xpf-1	Aflatoxin	0	V	9310797	C	CC/AC	1	AC/AC	2.7e-13	0	50	0	0	14	19	0	0	50	33	C>A	AATCATT	F44A2.3	Non-transcribed
CD0014d	xpf-1	Aflatoxin	0	X	4228769	A	AA/AT	1	AT/AT	5.2e-13	49	0	0	0	29	0	0	21	49	50	T>A	GGATTGG	W01H2.3	Non-transcribed
CD0014d	xpf-1	Aflatoxin	0	IV	11149367	C	CC/CT	1	CT/CT	5.9e-09	0	35	0	0	0	17	0	8	35	25	C>T	ATTCAAT	F01G4.6	Transcribed
CD0014d	xpf-1	Aflatoxin	0	IV	1761633	A	AA/AC	1	AC/AC	4.5e-08	32	0	0	0	31	28	0	0	32	59	T>G	TTTTCCT	Y41D4A.7	Non-transcribed
CD0014d	xpf-1	Aflatoxin	0	IV	1833964	C	CC/AC	1	AC/AC	2.3e-08	0	33	0	0	9	25	0	0	33	34	C>A	GCCCTTC	K07A9.2	Non-transcribed
CD0014d	xpf-1	Aflatoxin	0	IV	8375807	C	CC/CT	1	CT/CT	1.4e-13	0	51	0	0	0	34	0	39	51	73	C>T	TCTCCTC	D2096.7	Transcribed
CD0014d	xpf-1	Aflatoxin	0	IV	12326785	C	CC/CT	1	CT/CT	0.00013	0	20	0	0	0	30	0	12	20	42	C>T	GTGCCTA	No_gene	No_gene
CD0014d	xpf-1	Aflatoxin	0	II	10476904	G	GG/AG	1	AG/AG	4.4e-08	0	0	32	0	25	0	22	0	32	47	C>T	TATCTTT	No_gene	No_gene
CD0014d	xpf-1	Aflatoxin	0	II	9843591	T	TT/GT	1	GT/GT	2.5e-15	0	0	0	57	0	0	30	42	57	72	T>G	CTGTTGA	ZK938.6	Transcribed
CD0015a	polq-1	Aflatoxin	0	III	5820947	A	AA/TT	1	AA/AT	4.9e-06	47	0	0	0	0	0	0	17	47	17	T>A	TTTTAAA	No_gene	No_gene
CD0015a	polq-1	Aflatoxin	0	I	5471490	C	CC/CG	1	CG/CG	1.5e-09	0	37	0	0	0	29	30	0	37	59	C>G	TCTCAAC	No_gene	No_gene
CD0015a	polq-1	Aflatoxin	0	V	19755617	C	CC/CT	1	CC/TT	2.4e-09	0	37	0	0	0	4	0	21	37	25	C>T	GGGCTTC	No_gene	No_gene
CD0015a	polq-1	Aflatoxin	0	IV	6710380	G	GG/AG	1	GG/GG	0.00015	0	0	31	0	4	0	13	0	31	17	C>T	ACTCTCA	No_gene	No_gene
CD0015c	polq-1	Aflatoxin	0	I	1909335	A	AA/TT	0.8	AA/AT	0.19	50	0	0	0	0	0	0	2	50	2	T>A	AATTTTT	Y71G12A.2	Transcribed
CD0015d	polq-1	Aflatoxin	0	III	5366107	A	AA/GG	1	AA/AG	2.3e-06	40	0	0	0	1	0	29	0	40	30	T>C	TTGTAAT	Y32H12A.3	Non-transcribed
CD0015d	polq-1	Aflatoxin	0	V	3217865	C	CC/GG	0.76	CC/CG	0.18	0	42	0	0	0	0	2	0	42	2	C>G	TTTCATC	K08D9.3	Non-transcribed
CD0015d	polq-1	Aflatoxin	0	V	18619509	T	TT/AT	1	AT/AT	1.5e-11	0	0	0	44	21	0	0	76	44	97	T>A	GCATTTC	Y51A2D.17	Non-transcribed
CD0015d	polq-1	Aflatoxin	0	X	9230277	A	AA/TT	1	AT/TT	2.2e-08	33	0	0	0	2	0	0	61	33	63	T>A	TTTTAAA	C35B8.2	Non-transcribed
CD0015d	polq-1	Aflatoxin	0	X	16616905	C	CC/CT	1	CT/CT	2.2e-08	0	33	0	0	0	23	1	28	33	52	C>T	TTTCACC	No_gene	No_gene
CD0016a	N2	Aflatoxin	0.3	II	2734978	A	AA/AG	1	AG/AG	2.4e-06	26	0	0	0	9	0	18	0	26	27	T>C	TCTTGGC	T05A8.5	Non-transcribed
CD0016a	N2	Aflatoxin	0.3	II	2734980	G	GG/AG	1	AG/AG	1.2e-06	0	0	27	0	18	0	9	0	27	27	C>T	TCTCTTG	T05A8.5	Non-transcribed
CD0016a	N2	Aflatoxin	0.3	IV	7295834	C	CC/AC	1	AC/AC	2e-12	0	47	0	0	18	19	0	0	47	37	C>A	TTGCGTG	No_gene	No_gene
CD0016c	N2	Aflatoxin	0.3	V	20697787	G	GG/CG	1	CG/CG	7.1e-14	0	0	52	0	0	21	21	0	52	42	C>G	CAACAGA	F53F8.7	Non-transcribed
CD0016c	N2	Aflatoxin	0.3	X	2553175	C	CC/AC	1	AC/AC	1.6e-09	0	37	0	0	17	16	0	0	37	33	C>A	AAACATT	No_gene	No_gene
CD0016c	N2	Aflatoxin	0.3	X	15949409	C	CC/AA	1	CC/AC	0.00018	0	40	0	0	12	0	0	0	40	12	C>A	AATCGCG	No_gene	No_gene
CD0016c	N2	Aflatoxin	0.3	I	4506253	A	AA/TT	0.81	AA/AT	0.19	55	0	0	0	0	0	0	2	55	2	T>A	TTTTAGT	T01A4.1	Transcribed
CD0016d	N2	Aflatoxin	0.3	V	20336900	G	GG/GT	0.98	GG/GG	0.018	0	0	42	0	0	0	13	4	42	17	C>A	GTTCTTC	No_gene	No_gene
CD0016d	N2	Aflatoxin	0.3	X	16039976	G	GG/TT	0.65	GG/GG	0.19	0	0	52	0	0	0	0	2	52	2	C>A	AGTCGAC	No_gene	No_gene
CD0016d	N2	Aflatoxin	0.3	X	6175134	A	AA/AT	1	AT/AT	8e-10	38	0	0	0	28	0	0	21	38	49	T>A	AGTTAAA	T25B2.1	Transcribed
CD0016d	N2	Aflatoxin	0.3	X	6175135	A	AA/AG	1	AG/AG	1.6e-09	37	0	0	0	27	0	22	0	37	49	T>C	AAGTTAA	T25B2.1	Transcribed
CD0017a	xpa-1	Aflatoxin	0.3	II	12996312	C	CC/CT	1	CT/CT	2.1e-10	0	40	0	0	0	7	0	18	40	25	C>T	ACACGTG	Y38F1A.6	Transcribed
CD0017a	xpa-1	Aflatoxin	0.3	II	2639799	G	GG/GT	1	GT/GT	5.5e-11	0	0	42	0	0	0	14	9	42	23	C>A	AAACGCT	No_gene	No_gene
CD0017a	xpa-1	Aflatoxin	0.3	X	4985406	C	CC/AC	1	AC/AC	1.1e-10	0	41	0	0	13	7	0	0	41	20	C>A	ATGCCAA	ZC8.6	Transcribed
CD0017a	xpa-1	Aflatoxin	0.3	III	12980554	G	GG/GT	1	GT/GT	2.2e-10	0	0	40	0	0	0	10	13	40	23	C>A	GCGCTTG	No_gene	No_gene
CD0017a	xpa-1	Aflatoxin	0.3	III	9483312	G	GG/GT	1	GT/GT	2.1e-10	0	0	40	0	0	0	7	14	40	21	C>A	CTTCCTC	B0464.4	Non-transcribed
CD0017a	xpa-1	Aflatoxin	0.3	IV	6502750	T	TT/GG	1	TT/GT	5.9e-07	0	0	0	40	0	0	25	1	40	26	T>G	TTGTCCA	No_gene	No_gene
CD0017a	xpa-1	Aflatoxin	0.3	IV	6502751	C	CC/TT	1	CC/CT	4.5e-07	0	40	0	0	0	1	0	25	40	26	C>T	TGTCCAT	No_gene	No_gene
CD0017a	xpa-1	Aflatoxin	0.3	IV	7330030	C	CC/CG	1	CG/CG	1.1e-08	0	34	0	0	0	7	8	0	34	15	C>G	CCACTCT	Y40C5A.2	Transcribed
CD0017a	xpa-1	Aflatoxin	0.3	IV	9615920	C	CC/AC	1	AC/AC	4.1e-10	0	39	0	0	17	15	0	0	39	32	C>A	TCTCGTC	W09C2.1	Non-transcribed
CD0017a	xpa-1	Aflatoxin	0.3	IV	9615954	C	CC/CT	1	CT/CT	2.8e-11	0	43	0	0	0	18	0	16	43	34	C>T	ACTCTCT	W09C2.1	Non-transcribed
CD0017a	xpa-1	Aflatoxin	0.3	V	11025881	A	AA/AT	1	AA/AA	1.8e-07	52	0	0	1	20	0	0	5	53	25	T>A	TCATTAT	No_gene	No_gene
CD0017a	xpa-1	Aflatoxin	0.3	V	17010272	C	CC/AC	1	AC/AC	1.3e-15	0	58	0	0	11	15	0	0	58	26	C>A	AATCCGG	F49H6.1	Non-transcribed
CD0017c	xpa-1	Aflatoxin	0.3	III	8393586	C	CC/TT	1	CT/TT	2.8e-11	0	43	0	0	0	0	0	39	43	39	C>T	TTCCAAA	ZK353.10	Transcribed
CD0017c	xpa-1	Aflatoxin	0.3	III	8829133	C	CC/CT	1	CT/CT	7.5e-12	0	45	0	0	0	26	0	20	45	46	C>T	TCTCTGT	F44E2.3	Transcribed
CD0017c	xpa-1	Aflatoxin	0.3	III	3538362	G	GG/TT	1	GG/GT	3.8e-09	0	0	51	0	0	0	0	27	51	27	C>A	CAACTGC	C54C6.2	Non-transcribed
CD0017c	xpa-1	Aflatoxin	0.3	V	759821	C	CC/CT	1	CC/AC	2.2e-07	1	40	0	0	7	9	0	8	41	24	C>T	TTGCGCA	No_gene	No_gene
CD0017c	xpa-1	Aflatoxin	0.3	V	4114620	C	CC/GG	1	CG/GG	3e-09	0	36	0	0	0	0	45	0	36	45	C>G	CTACATT	T05B4.6	Transcribed
CD0017c	xpa-1	Aflatoxin	0.3	V	14275482	G	GG/GT	0.81	GG/GG	0.19	0	0	50	0	0	0	15	4	50	19	C>A	GGTCAGG	No_gene	No_gene
CD0017c	xpa-1	Aflatoxin	0.3	X	2426142	T	TT/CC	1	CT/CC	5.6e-11	0	0	0	42	0	49	0	0	42	49	T>C	GTGTTCC	T07D1.1	Transcribed
CD0017c	xpa-1	Aflatoxin	0.3	X	6937067	C	CC/AC	1	AC/AC	1.7e-07	0	30	0	0	24	23	0	0	30	47	C>A	TCGCCAG	C16E9.2	Non-transcribed
CD0017c	xpa-1	Aflatoxin	0.3	X	1089845	C	CC/CG	1	CG/CG	4.4e-08	0	32	0	0	0	23	27	0	32	50	C>G	TGGCCTA	F49E7.4	Transcribed
CD0017c	xpa-1	Aflatoxin	0.3	II	8114753	G	GG/GT	1	GT/GT	1.3e-12	0	1	48	0	0	0	29	21	49	50	C>A	CACCGCG	C41C4.4	Non-transcribed
CD0017c	xpa-1	Aflatoxin	0.3	I	7305047	C	CC/AC	1	CC/CC	9.5e-10	0	64	0	0	8	22	0	0	64	30	C>A	TCTCCAG	F13G3.7	Non-transcribed
CD0017c	xpa-1	Aflatoxin	0.3	I	11077295	C	CC/TT	1	CC/CT	5.7e-07	0	38	0	0	0	0	0	20	38	20	C>T	TTTCCAT	W02B9.1	Transcribed
CD0017c	xpa-1	Aflatoxin	0.3	IV	1732281	T	TT/CT	1	TT/TT	3.4e-09	0	0	0	47	0	6	0	23	47	29	T>C	TTTTAGC	Y41D4A.5	Transcribed
CD0017d	xpa-1	Aflatoxin	0.3	X	14736089	C	CC/AC	1	AC/AC	6e-09	0	35	0	0	32	34	0	0	35	66	C>A	CCGCAAA	C05G5.1	Transcribed
CD0017d	xpa-1	Aflatoxin	0.3	III	9125888	C	CC/AC	1	AC/AC	3e-09	0	36	0	0	33	34	0	0	36	67	C>A	TTTCCCA	ZK512.5	Non-transcribed
CD0017d	xpa-1	Aflatoxin	0.3	I	5609316	C	CC/CT	1	CT/CT	1.6e-09	0	37	0	0	0	40	0	41	37	81	C>T	ATTCGTA	F46F11.5	Transcribed
CD0017d	xpa-1	Aflatoxin	0.3	I	1652519	T	TT/GT	1	TT/GG	2.3e-12	0	0	0	51	0	0	12	7	51	19	T>G	AAATTCT	No_gene	No_gene
CD0017d	xpa-1	Aflatoxin	0.3	I	1652561	T	TT/GT	1	GT/GT	2.8e-11	0	0	0	43	0	0	8	23	43	31	T>G	AAATTCT	No_gene	No_gene
CD0017d	xpa-1	Aflatoxin	0.3	IV	10856071	G	GG/GT	1	GT/GT	8e-10	0	0	38	0	0	0	42	30	38	72	C>A	GTTCCCA	T11G6.2	Non-transcribed
CD0018a	csb-1	Aflatoxin	0.3	II	14975370	G	GG/TT	0.86	GG/GT	0.1	0	0	52	0	0	0	0	3	52	3	C>A	ATTCGAA	Y53F4B.4	Transcribed
CD0018a	csb-1	Aflatoxin	0.3	I	2965410	C	CC/AC	1	AC/AC	2e-12	0	47	0	0	23	28	0	0	47	51	C>A	GGACCCA	No_gene	No_gene
CD0018a	csb-1	Aflatoxin	0.3	V	13385857	C	CC/AC	1	AC/AC	5.3e-13	0	49	0	0	28	31	0	0	49	59	C>A	CAGCTGC	M04G12.3	Transcribed
CD0018a	csb-1	Aflatoxin	0.3	IV	13601916	G	GG/AG	1	AG/AG	5.6e-11	0	0	42	0	30	0	37	0	42	67	C>T	TAACTTA	No_gene	No_gene
CD0018c	csb-1	Aflatoxin	0.3	IV	12729029	C	CC/TT	0.79	CC/CT	0.19	0	38	0	0	0	0	0	2	38	2	C>T	CTGCCGA	T23F6.4	Non-transcribed
CD0018c	csb-1	Aflatoxin	0.3	I	5596855	T	TT/GT	1	GT/GT	5.2e-13	0	0	0	49	0	0	15	52	49	67	T>G	TGCTTGG	M01E11.7	Transcribed
CD0018d	csb-1	Aflatoxin	0.3	X	7034246	C	CC/CT	1	CT/CT	2.6e-13	0	50	0	0	0	25	0	35	50	60	C>T	CCGCTGA	R173.3	Transcribed
CD0018d	csb-1	Aflatoxin	0.3	V	4204262	A	AA/GG	0.8	AA/AG	0.19	45	0	0	0	0	0	2	0	45	2	T>C	ATATTAA	No_gene	No_gene
CD0018d	csb-1	Aflatoxin	0.3	V	12366151	C	CC/AC	0.95	CC/CC	0.054	0	38	0	0	7	25	0	0	38	32	C>A	GGTCGTT	F23H12.6	Transcribed
CD0018d	csb-1	Aflatoxin	0.3	III	3426082	T	TT/AA	0.8	TT/AT	0.19	0	0	0	49	2	0	0	0	49	2	T>A	AATTAGA	K01A11.2	Non-transcribed
CD0018d	csb-1	Aflatoxin	0.3	III	12402363	G	GG/AG	1	AG/AG	1.6e-09	0	0	37	0	19	0	24	1	37	44	C>T	TGTCAAG	Y49E10.11	Non-transcribed
CD0018d	csb-1	Aflatoxin	0.3	II	14745397	G	GG/GT	0.89	GG/GG	0.11	0	0	50	0	0	0	22	6	50	28	C>A	GCTCAAT	No_gene	No_gene
CD0018d	csb-1	Aflatoxin	0.3	II	6000647	G	GG/CG	1	CG/CG	5.1e-13	0	0	49	0	1	43	37	0	49	81	C>G	GTGCTGG	ZK84.6	Transcribed
CD0019a	xpc-1	Aflatoxin	0.3	X	8987135	C	CC/TT	1	CT/TT	3e-09	0	36	0	0	0	0	0	44	36	44	C>T	GGTCCCT	No_gene	No_gene
CD0019a	xpc-1	Aflatoxin	0.3	X	7973957	G	GG/GT	1	GT/GT	2.1e-10	0	0	40	0	0	0	27	26	40	53	C>A	TCGCGTG	No_gene	No_gene
CD0019a	xpc-1	Aflatoxin	0.3	IV	12277067	C	CC/AC	1	AC/AC	3.1e-09	0	36	0	0	22	22	0	0	36	44	C>A	AATCGGA	C42C1.5	Transcribed
CD0019c	xpc-1	Aflatoxin	0.3	III	7348755	C	CC/CT	1	CC/CC	0.0012	0	46	0	0	0	15	0	4	46	19	C>T	ATGCCCT	F08F8.8	Transcribed
CD0019c	xpc-1	Aflatoxin	0.3	II	2252522	C	CC/CT	1	CT/CT	2.5e-15	0	57	0	0	0	23	0	19	57	42	C>T	TTGCGGG	F54A3.2	Non-transcribed
CD0019c	xpc-1	Aflatoxin	0.3	I	13670666	A	AA/GG	0.78	AA/AG	0.18	54	0	0	0	0	0	2	0	54	2	T>C	TTCTGAA	W04A4.5	Transcribed
CD0019c	xpc-1	Aflatoxin	0.3	I	10277786	G	GG/GT	1	GT/GT	8e-10	0	0	38	0	0	0	28	34	38	62	C>A	GATCGGA	ZC247.1	Non-transcribed
CD0019c	xpc-1	Aflatoxin	0.3	V	9677988	G	GG/TT	1	GT/TT	3.8e-12	0	0	46	0	0	0	0	63	46	63	C>A	ATACAAT	No_gene	No_gene
CD0019c	xpc-1	Aflatoxin	0.3	V	13750242	G	GG/AG	1	AG/AG	2.5e-11	0	0	43	1	41	0	33	0	44	74	C>T	AAGCGTT	F35E12.8	Non-transcribed
CD0019c	xpc-1	Aflatoxin	0.3	X	10883026	C	CC/AC	1	AC/AC	1.1e-10	0	41	0	0	25	22	0	0	41	47	C>A	AAGCGAT	T21E8.6	Non-transcribed
CD0019c	xpc-1	Aflatoxin	0.3	X	10883109	G	GG/AG	1	AG/AG	4.8e-15	0	0	56	0	30	0	54	0	56	84	C>T	CCTCGTT	No_gene	No_gene
CD0019c	xpc-1	Aflatoxin	0.3	X	12986331	C	CC/AC	1	AC/AC	1.2e-08	0	34	0	0	21	19	0	0	34	40	C>A	CAGCCGT	F11C1.2	Transcribed
CD0019c	xpc-1	Aflatoxin	0.3	IV	4920773	G	GG/AG	1	GG/GG	9.3e-07	0	0	34	0	5	0	20	0	34	25	C>T	GTTCCAG	Y9C9A.8	Transcribed
CD0019d	xpc-1	Aflatoxin	0.3	V	224366	C	CC/CT	1	CT/CT	2.1e-10	0	40	0	0	0	39	0	22	40	61	C>T	AGGCGTG	DC2.6	Transcribed
CD0019d	xpc-1	Aflatoxin	0.3	X	5984911	G	GG/AG	1	AG/AG	4.7e-06	0	0	25	0	31	0	41	0	25	72	C>T	AGTCTCG	No_gene	No_gene
CD0019d	xpc-1	Aflatoxin	0.3	X	9188904	A	AA/AT	0.99	AA/AA	0.0073	37	0	0	0	12	0	0	3	37	15	T>A	AAATTTT	Y81B9A.2	Transcribed
CD0019d	xpc-1	Aflatoxin	0.3	X	9188910	A	AA/AT	0.99	AA/AA	0.0072	35	0	0	0	12	0	0	3	35	15	T>A	AAATTCA	Y81B9A.2	Transcribed
CD0019d	xpc-1	Aflatoxin	0.3	X	6919138	C	CC/GG	1	CG/GG	4.1e-10	0	39	0	0	0	0	76	0	39	76	C>G	TTACATC	F14B8.1	Non-transcribed
CD0019d	xpc-1	Aflatoxin	0.3	X	6995391	C	CC/CT	1	CT/CT	4.4e-08	0	32	0	0	0	35	0	41	32	76	C>T	CTTCCAT	F01E11.4	Transcribed
CD0020a	xpf-1	Aflatoxin	0.3	III	2983934	A	AA/GG	0.8	AA/AG	0.19	37	0	0	0	0	0	2	0	37	2	T>C	AGTTCAA	Y55D5A.1	Transcribed
CD0020a	xpf-1	Aflatoxin	0.3	III	13115889	A	AA/TT	0.73	AA/AT	0.17	43	0	0	0	0	0	0	2	43	2	T>A	TTTTTAA	Y39E4B.7	Transcribed
CD0020a	xpf-1	Aflatoxin	0.3	III	7483352	G	GG/GT	1	GT/GT	7.8e-12	0	0	45	0	0	0	48	24	45	72	C>A	CTTCGAT	K07D8.1	Non-transcribed
CD0020a	xpf-1	Aflatoxin	0.3	IV	15478515	T	TT/GT	1	GT/GT	1.4e-13	0	0	0	51	0	0	25	14	51	39	T>G	CACTCAA	No_gene	No_gene
CD0020a	xpf-1	Aflatoxin	0.3	I	2621070	T	TT/GT	1	TT/TT	0.00058	0	0	0	28	0	0	10	35	28	45	T>G	AGGTGTT	Y23H5A.3	Non-transcribed
CD0020a	xpf-1	Aflatoxin	0.3	X	14567385	G	GG/AG	1	AG/AG	1.6e-09	0	0	37	0	23	0	20	0	37	43	C>T	TAACCCA	No_gene	No_gene
CD0020a	xpf-1	Aflatoxin	0.3	X	157392	G	GG/AG	1	AG/AG	5.7e-11	0	0	42	0	22	0	23	0	42	45	C>T	TTTCAGG	No_gene	No_gene
CD0020c	xpf-1	Aflatoxin	0.3	III	7331675	C	CC/CT	1	CT/CT	1.4e-13	0	51	0	0	0	36	0	51	51	87	C>T	TATCTCC	F56C9.10	Transcribed
CD0020c	xpf-1	Aflatoxin	0.3	IV	3684294	A	AA/GG	0.8	AA/AG	0.19	38	0	0	0	0	0	2	0	38	2	T>C	TATTTTT	Y37E11AL.7	Non-transcribed
CD0020c	xpf-1	Aflatoxin	0.3	IV	12271890	C	CC/CT	1	CT/CT	1.2e-08	0	34	0	0	0	50	0	32	34	82	C>T	CTTCAAG	C42C1.4	Transcribed
CD0020c	xpf-1	Aflatoxin	0.3	IV	1083734	C	CC/CT	1	CT/CT	9.5e-15	0	55	0	0	0	15	0	24	55	39	C>T	TTTCCGC	Y55F3AM.15	Transcribed
CD0020c	xpf-1	Aflatoxin	0.3	IV	14462507	C	CC/CT	1	CT/CT	2.5e-15	0	57	0	0	0	14	0	27	57	41	C>T	GCCCCTT	LLC1.2	Non-transcribed
CD0020c	xpf-1	Aflatoxin	0.3	I	8436668	T	TT/AT	1	AT/AT	3.8e-12	0	0	0	46	19	0	0	23	46	42	T>A	TAGTTTT	F10D11.2	Transcribed
CD0020c	xpf-1	Aflatoxin	0.3	I	7732196	A	AA/AT	1	AT/AT	1e-12	48	0	0	0	14	0	0	16	48	30	T>A	ATATCAT	F27D4.6	Transcribed
CD0020c	xpf-1	Aflatoxin	0.3	II	12270596	G	GG/TT	0.71	GG/GT	0.17	0	0	51	0	0	0	0	2	51	2	C>A	GTTCAGA	Y57A10A.27	Non-transcribed
CD0020c	xpf-1	Aflatoxin	0.3	X	4240381	G	GG/AG	1	AG/AG	3.6e-14	0	0	53	0	18	0	19	0	53	37	C>T	GCACTCT	No_gene	No_gene
CD0020d	xpf-1	Aflatoxin	0.3	III	13167591	C	CC/CT	1	CT/CT	5.2e-13	0	49	0	0	0	20	0	24	49	44	C>T	ATTCAAA	Y39E4B.2	Transcribed
CD0020d	xpf-1	Aflatoxin	0.3	I	5844804	G	GG/AG	1	AG/AG	1.5e-11	0	0	44	0	29	0	30	0	44	59	C>T	ACCCTCA	No_gene	No_gene
CD0020d	xpf-1	Aflatoxin	0.3	I	6495702	G	GG/AG	1	AG/AG	2.2e-10	0	0	40	0	19	0	30	0	40	49	C>T	GTTCAGT	C55B7.5	Transcribed
CD0020d	xpf-1	Aflatoxin	0.3	IV	5144988	C	CC/CT	1	CT/CT	3.6e-14	0	53	0	0	0	18	0	18	53	36	C>T	CGGCACT	AC7.2	Transcribed
CD0020d	xpf-1	Aflatoxin	0.3	IV	12250349	G	GG/AG	1	AG/AG	1.5e-11	0	0	44	0	21	0	29	2	44	52	C>T	GGGCAAA	No_gene	No_gene
CD0020d	xpf-1	Aflatoxin	0.3	V	3693573	G	GG/GT	1	GT/GT	1.4e-11	0	0	44	0	0	0	40	34	44	74	C>A	AAGCGGA	W08A12.1	Transcribed
CD0020d	xpf-1	Aflatoxin	0.3	V	6383195	C	CC/CT	1	CT/CT	7.1e-14	0	52	0	0	0	34	0	29	52	63	C>T	AAGCTTA	No_gene	No_gene
CD0020d	xpf-1	Aflatoxin	0.3	V	15841828	G	GG/AG	1	AG/AG	1.6e-09	0	0	37	0	31	0	31	0	37	62	C>T	TCCCTCG	K08G2.3	Non-transcribed
CD0020d	xpf-1	Aflatoxin	0.3	X	12125944	T	TT/GT	1	GT/GT	1.1e-10	0	0	0	41	0	0	33	42	41	75	T>G	AGGTAGG	T01H10.7	Non-transcribed
CD0020d	xpf-1	Aflatoxin	0.3	X	10067937	C	CC/CT	1	CT/CT	6.9e-14	0	52	0	0	0	36	0	20	52	56	C>T	ATTCAGA	ZC373.4	Transcribed
CD0020d	xpf-1	Aflatoxin	0.3	X	15790795	G	GG/GT	1	GT/GT	1.2e-08	0	0	34	0	0	0	39	33	34	72	C>A	TGGCACC	No_gene	No_gene
CD0021a	polq-1	Aflatoxin	0.3	I	455948	C	CC/TT	0.75	CC/CT	0.18	0	38	0	0	0	0	0	2	38	2	C>T	GTTCCTT	C07F11.1	Non-transcribed
CD0021a	polq-1	Aflatoxin	0.3	IV	16788530	A	AA/AT	1	AA/AA	7.1e-09	51	0	0	1	16	0	0	5	52	21	T>A	AAATAGG	No_gene	No_gene
CD0021a	polq-1	Aflatoxin	0.3	X	11456605	C	CC/AC	1	AC/AC	6.5e-16	0	59	0	0	48	40	0	0	59	88	C>A	TTTCGGG	No_gene	No_gene
CD0021a	polq-1	Aflatoxin	0.3	X	4623228	A	AA/TT	1	AA/AT	7.6e-09	45	0	0	0	0	0	0	26	45	26	T>A	TTTTAAT	No_gene	No_gene
CD0021c	polq-1	Aflatoxin	0.3	X	5670799	C	CC/AC	1	AC/AC	7.4e-12	0	45	0	0	43	25	0	0	45	68	C>A	CCACGCT	T22B7.1	Non-transcribed
CD0021c	polq-1	Aflatoxin	0.3	X	13253884	G	GG/AA	1	AG/AA	1.5e-11	0	0	44	0	56	0	0	0	44	56	C>T	AATCGTA	K08H2.8	Transcribed
CD0021c	polq-1	Aflatoxin	0.3	III	10752337	G	GG/GT	1	GT/GT	5.5e-11	0	0	42	0	0	0	16	12	42	28	C>A	AGGCGGC	K01G5.2	Non-transcribed
CD0021c	polq-1	Aflatoxin	0.3	V	13423256	C	CC/CT	1	CT/CT	6.9e-14	0	52	0	0	1	33	0	35	52	69	C>T	TATCACA	No_gene	No_gene
CD0021c	polq-1	Aflatoxin	0.3	I	11218437	A	AA/GG	0.77	AA/AG	0.18	29	0	0	0	0	0	2	0	29	2	T>C	TTTTTTT	Y53H1A.1	Non-transcribed
CD0021c	polq-1	Aflatoxin	0.3	I	4755661	C	CC/TT	0.8	CC/CT	0.19	0	36	0	0	0	0	0	2	36	2	C>T	GATCACT	C10H11.1	Non-transcribed
CD0021c	polq-1	Aflatoxin	0.3	IV	4408883	C	CC/AC	1	AC/AC	2.5e-06	0	26	0	0	35	30	0	0	26	65	C>A	CTGCTAT	Y24D9A.1	Non-transcribed
CD0021c	polq-1	Aflatoxin	0.3	II	14216456	C	CC/AC	1	AC/AC	6.6e-07	0	28	0	0	28	27	0	0	28	55	C>A	AAGCTGA	Y48B6A.10	Non-transcribed
CD0021d	polq-1	Aflatoxin	0.3	II	14500785	G	GG/AG	1	AG/AG	6.1e-09	0	0	35	0	25	0	30	0	35	55	C>T	CTGCATG	K10H10.4	Transcribed
CD0021d	polq-1	Aflatoxin	0.3	I	1366055	T	TT/AT	1	AT/AT	5.5e-11	0	0	0	42	9	0	0	11	42	20	T>A	AAATACT	Y92H12BL.5	Non-transcribed
CD0021d	polq-1	Aflatoxin	0.3	IV	11950309	C	CC/AC	1	AC/AC	2e-12	0	47	0	0	29	23	0	0	47	52	C>A	TTCCCCA	No_gene	No_gene
CD0021d	polq-1	Aflatoxin	0.3	V	5548683	C	CC/CG	1	CG/CG	2.1e-10	0	40	0	0	0	32	20	0	40	52	C>G	TTGCGCA	No_gene	No_gene
CD0021d	polq-1	Aflatoxin	0.3	V	9248986	G	GG/AA	1	GG/AG	4.3e-15	0	0	58	0	46	0	0	0	58	46	C>T	ATTCATA	F07C3.8	Non-transcribed
CD0021d	polq-1	Aflatoxin	0.3	V	13793915	G	GG/GT	0.99	GG/GG	0.015	0	0	33	0	0	0	18	6	33	24	C>A	GGTCATA	F53C11.5	Transcribed
CD0022a	N2	Aflatoxin	3	II	1231858	G	GG/AG	1	AG/AG	1e-12	0	0	48	0	10	0	11	0	48	21	C>T	TTTCGGA	No_gene	No_gene
CD0022a	N2	Aflatoxin	3	II	9775648	G	GG/GT	1	GT/GT	2.1e-10	0	0	40	0	0	0	25	19	40	44	C>A	AAACCGT	T10B9.9	Non-transcribed
CD0022a	N2	Aflatoxin	3	V	6829401	C	CC/AC	1	AC/AC	2.8e-11	0	43	0	0	24	29	0	0	43	53	C>A	TTTCGTT	No_gene	No_gene
CD0022a	N2	Aflatoxin	3	IV	16209957	C	CC/AA	1	AC/AA	3.8e-12	0	46	0	0	57	0	0	0	46	57	C>A	TTTCAAA	No_gene	No_gene
CD0022a	N2	Aflatoxin	3	IV	16437960	C	CC/AC	1	AC/AC	5.9e-09	0	35	0	0	30	17	0	0	35	47	C>A	CCGCTGG	No_gene	No_gene
CD0022a	N2	Aflatoxin	3	X	11479760	C	CC/AC	1	AC/AC	8e-10	0	38	0	0	29	39	0	0	38	68	C>A	AAACGTG	T25C12.1	Non-transcribed
CD0022c	N2	Aflatoxin	3	IV	340240	C	CC/CG	1	CG/CG	2e-12	0	47	0	0	0	26	18	0	47	44	C>G	AAGCACC	No_gene	No_gene
CD0022c	N2	Aflatoxin	3	I	10896073	T	TT/CT	1	CT/CT	2.6e-13	0	0	0	50	0	26	0	12	50	38	T>C	ATTTTAG	No_gene	No_gene
CD0022d	N2	Aflatoxin	3	III	7509041	C	CC/AC	1	AC/AC	8.3e-10	0	38	0	0	17	26	0	0	38	43	C>A	ACTCCGA	C07H6.3	Non-transcribed
CD0022d	N2	Aflatoxin	3	III	3147254	C	CC/AC	1	AC/AC	1.7e-07	0	30	0	0	25	20	0	0	30	45	C>A	CTGCGTC	No_gene	No_gene
CD0022d	N2	Aflatoxin	3	III	9463040	C	CC/AC	1	AC/AC	4.1e-10	0	39	0	0	27	50	0	0	39	77	C>A	TCACGCC	B0464.6	Transcribed
CD0022d	N2	Aflatoxin	3	III	740193	C	CC/AC	1	AC/AC	2.8e-11	0	43	0	0	33	24	0	0	43	57	C>A	TGGCGCT	T17H7.4	Transcribed
CD0022d	N2	Aflatoxin	3	X	9490817	C	CC/CT	1	CT/CT	1.5e-11	0	44	0	0	0	41	0	27	44	68	C>T	TAGCGCC	ZK899.8	Non-transcribed
CD0022d	N2	Aflatoxin	3	X	1858726	A	AA/AC	1	AA/AA	0.00014	28	1	0	0	20	7	0	0	29	27	T>G	AGGTGAG	No_gene	No_gene
CD0022d	N2	Aflatoxin	3	II	2948436	G	GG/GT	1	GT/GT	5.5e-11	0	0	42	0	0	0	26	25	42	51	C>A	CTTCATC	T11F1.5	Transcribed
CD0022d	N2	Aflatoxin	3	I	2390989	T	TT/GT	0.97	TT/TT	0.022	0	0	0	15	0	0	5	17	15	22	T>G	TGGTGTA	Y39G10AR.18	Transcribed
CD0022d	N2	Aflatoxin	3	IV	1356873	G	GG/GT	1	GT/GT	3.5e-14	0	0	53	0	0	0	32	31	53	63	C>A	ATGCGAG	No_gene	No_gene
CD0022d	N2	Aflatoxin	3	IV	2856464	G	GG/TT	1	GT/TT	8e-10	0	0	38	0	0	0	0	40	38	40	C>A	GATCTAC	Y54G2A.16	Non-transcribed
CD0022d	N2	Aflatoxin	3	IV	3895314	T	TT/AA	1	AT/AA	2.8e-11	0	0	0	43	61	0	0	0	43	61	T>A	GACTCAA	F56D6.10	Non-transcribed
CD0022d	N2	Aflatoxin	3	IV	5640855	G	GG/GT	1	GT/GT	1.1e-10	0	0	41	0	0	0	13	18	41	31	C>A	GTTCAGG	B0547.28	Non-transcribed
CD0023a	xpa-1	Aflatoxin	3	II	2612483	C	CC/AC	0.91	CC/CC	0.086	0	45	0	0	4	11	0	0	45	15	C>A	GTTCAAA	No_gene	No_gene
CD0023a	xpa-1	Aflatoxin	3	II	4349542	A	AA/TT	0.8	AA/AT	0.19	47	0	0	0	0	0	0	2	47	2	T>A	AAATTAA	H20J04.2	Transcribed
CD0023a	xpa-1	Aflatoxin	3	X	1336778	A	AA/AC	1	AA/AA	8.1e-05	44	0	0	0	29	10	0	0	44	39	T>G	TTGTGGG	F21E9.3	Non-transcribed
CD0023a	xpa-1	Aflatoxin	3	X	9103421	C	CC/AC	1	AC/AC	1.7e-07	0	30	0	0	30	27	0	0	30	57	C>A	AACCCAG	C25A11.4	Non-transcribed
CD0023a	xpa-1	Aflatoxin	3	V	7237059	C	CC/TT	1	CT/TT	4.2e-10	0	39	0	0	0	0	0	37	39	37	C>T	ATTCCTC	C05C8.6	Transcribed
CD0023a	xpa-1	Aflatoxin	3	V	15892996	C	CC/AC	1	AC/AC	2.7e-13	0	50	0	0	27	32	0	0	50	59	C>A	ATACCAT	T06C12.11	Non-transcribed
CD0023a	xpa-1	Aflatoxin	3	III	10545959	T	TT/GT	1	GT/GT	1.7e-07	0	0	0	30	0	0	9	34	30	43	T>G	GGGTGGA	No_gene	No_gene
CD0023a	xpa-1	Aflatoxin	3	III	10857152	C	CC/GG	1	CG/GG	5.9e-09	0	35	0	0	0	0	30	0	35	30	C>G	CCACAGT	Y39A1C.1	Non-transcribed
CD0023a	xpa-1	Aflatoxin	3	IV	15687432	C	CC/CT	1	CT/CT	4.5e-17	0	63	0	0	0	21	0	19	63	40	C>T	TGACGTC	No_gene	No_gene
CD0023a	xpa-1	Aflatoxin	3	IV	13029133	C	CC/AC	1	CC/CC	5.2e-10	0	49	0	0	8	17	0	4	49	29	C>A	TGGCCGC	F49E11.1	Non-transcribed
CD0023a	xpa-1	Aflatoxin	3	IV	10916221	C	CC/AC	1	AC/AC	4.1e-10	0	39	0	0	13	23	0	0	39	36	C>A	GAACGAC	No_gene	No_gene
CD0023a	xpa-1	Aflatoxin	3	IV	11064174	T	TT/GT	0.97	TT/TT	0.026	0	0	0	42	0	0	9	35	42	44	T>G	AGGTGTT	No_gene	No_gene
CD0023a	xpa-1	Aflatoxin	3	IV	11375924	G	GG/AA	1	AG/AA	1.3e-06	0	0	27	0	60	0	0	0	27	60	C>T	TTCCATC	H02I12.1	Transcribed
CD0023a	xpa-1	Aflatoxin	3	IV	11375925	G	GG/AA	1	AG/AA	6.3e-07	0	0	28	0	58	0	0	0	28	58	C>T	GTTCCAT	H02I12.1	Transcribed
CD0023a	xpa-1	Aflatoxin	3	IV	11864164	A	AA/AT	1	AT/AT	5.5e-11	42	0	0	0	21	0	0	30	42	51	T>A	TACTTCA	No_gene	No_gene
CD0023a	xpa-1	Aflatoxin	3	IV	9026031	C	CC/AC	1	AC/AC	5.2e-13	0	49	0	0	19	34	0	0	49	53	C>A	AAGCTTG	C53D6.5	Non-transcribed
CD0023a	xpa-1	Aflatoxin	3	I	5020120	A	AA/AG	1	AA/AA	0.0002	28	0	0	0	21	0	7	0	28	28	T>C	CGCTCCC	F54C1.7	Non-transcribed
CD0023a	xpa-1	Aflatoxin	3	I	7434930	A	AA/AC	1	AC/AC	2.9e-11	43	0	0	0	27	16	0	0	43	43	T>G	AGGTACA	ZK524.2	Transcribed
CD0023a	xpa-1	Aflatoxin	3	I	3808105	G	GG/AG	1	AG/AG	1.5e-11	0	0	44	0	20	0	40	0	44	60	C>T	AAACGCG	C32E8.11	Non-transcribed
CD0023c	xpa-1	Aflatoxin	3	IV	4219452	C	CC/AC	1	AC/AC	2.6e-13	0	50	0	0	14	11	0	0	50	25	C>A	ATTCCAA	No_gene	No_gene
CD0023c	xpa-1	Aflatoxin	3	IV	1296545	C	CC/CG	1	CG/CG	5.9e-09	0	35	0	0	0	11	8	0	35	19	C>G	ATCCCAA	No_gene	No_gene
CD0023c	xpa-1	Aflatoxin	3	I	7951750	C	CC/CT	1	CT/CT	4.1e-10	0	39	0	0	0	12	0	16	39	28	C>T	CACCGAA	T22C1.15	Non-transcribed
CD0023c	xpa-1	Aflatoxin	3	I	6443977	G	GG/GT	1	GT/GT	1.6e-09	0	0	37	0	0	0	11	16	37	27	C>A	CAGCCAA	T23H2.3	Non-transcribed
CD0023c	xpa-1	Aflatoxin	3	I	12848184	G	GG/AG	1	AG/AG	8e-10	0	0	38	0	8	0	18	0	38	26	C>T	ACACGGT	Y18D10A.8	Transcribed
CD0023c	xpa-1	Aflatoxin	3	II	9890937	G	GG/GT	1	GT/GT	8.5e-08	0	0	31	0	0	0	8	11	31	19	C>A	TTGCCTT	C08H9.2	Non-transcribed
CD0023c	xpa-1	Aflatoxin	3	III	1080316	C	CC/CG	1	CG/CG	5.9e-09	0	35	0	0	0	21	6	0	35	27	C>G	CCACGAA	Y92C3B.3	Transcribed
CD0023c	xpa-1	Aflatoxin	3	III	9036647	C	CC/CT	1	CT/CT	7e-14	0	52	0	0	0	9	0	14	52	23	C>T	GTCCAAA	No_gene	No_gene
CD0023c	xpa-1	Aflatoxin	3	X	1376952	T	TT/AT	1	AT/AT	4.1e-10	0	0	0	39	11	0	0	17	39	28	T>A	CAATTTT	No_gene	No_gene
CD0023c	xpa-1	Aflatoxin	3	X	4699656	G	GG/CG	1	CG/CG	6.4e-07	0	0	28	0	0	7	14	0	28	21	C>G	CTGCGCA	No_gene	No_gene
CD0023c	xpa-1	Aflatoxin	3	X	8932793	C	CC/TT	1	CC/CT	1e-05	0	62	0	0	0	0	0	16	62	16	C>T	ATGCCGT	D1009.1	Non-transcribed
CD0023d	xpa-1	Aflatoxin	3	X	15866113	G	GG/AG	1	AG/AG	4.1e-10	0	0	39	0	23	0	15	0	39	38	C>T	TTACTTT	No_gene	No_gene
CD0023d	xpa-1	Aflatoxin	3	X	15866114	T	TT/AT	1	AT/AT	4.2e-10	0	0	0	39	22	0	0	16	39	38	T>A	AAGTAAA	No_gene	No_gene
CD0023d	xpa-1	Aflatoxin	3	X	16803787	C	CC/AC	1	AC/AC	5.2e-13	0	49	0	0	14	16	0	0	49	30	C>A	ACTCTAC	T01C8.7	Transcribed
CD0023d	xpa-1	Aflatoxin	3	V	16433333	C	CC/TT	1	CT/TT	2.2e-08	0	33	0	0	0	0	0	52	33	52	C>T	ACTCGTT	F26D2.12	Transcribed
CD0023d	xpa-1	Aflatoxin	3	IV	15962082	G	GG/AG	1	AG/AG	4.8e-15	0	0	56	0	20	0	18	0	56	38	C>T	TACCCGC	Y105C5B.16	Non-transcribed
CD0023d	xpa-1	Aflatoxin	3	IV	8734528	G	GG/GT	1	GT/GT	4.1e-10	0	0	39	0	0	0	27	19	39	46	C>A	ATACAGA	F21D5.3	Transcribed
CD0023d	xpa-1	Aflatoxin	3	II	7701785	G	GG/AG	1	AG/AG	3.8e-12	0	0	46	0	16	0	14	0	46	30	C>T	TTTCTGG	B0495.2	Transcribed
CD0023d	xpa-1	Aflatoxin	3	II	7837102	C	CC/CT	1	CT/CT	5.5e-11	0	42	0	0	0	18	0	16	42	34	C>T	GAGCAGC	No_gene	No_gene
CD0023d	xpa-1	Aflatoxin	3	II	8233877	C	CC/AC	1	AC/AC	5.2e-13	0	49	0	0	14	29	0	0	49	43	C>A	CATCGCG	M110.7	Non-transcribed
CD0023d	xpa-1	Aflatoxin	3	II	5081425	C	CC/AC	1	AC/AC	5.9e-09	0	35	0	0	16	13	0	0	35	29	C>A	ACGCGTC	No_gene	No_gene
CD0023d	xpa-1	Aflatoxin	3	I	14607270	C	CC/CT	1	CT/CT	3.6e-14	0	53	0	0	0	22	0	20	53	42	C>T	TTTCATA	No_gene	No_gene
CD0023d	xpa-1	Aflatoxin	3	III	1146955	C	CC/CT	1	CT/CT	4.7e-06	0	25	0	0	0	14	0	23	25	37	C>T	CCGCCGT	No_gene	No_gene
CD0023d	xpa-1	Aflatoxin	3	III	9231324	C	CC/AC	1	AC/AC	3.9e-12	0	46	0	0	15	28	0	0	46	43	C>A	TTGCCTC	T23G5.2	Transcribed
CD0023d	xpa-1	Aflatoxin	3	III	12370005	C	CC/CT	1	CT/CT	3.9e-12	0	46	0	0	0	13	0	16	46	29	C>T	TTTCGAA	No_gene	No_gene
CD0024a	csb-1	Aflatoxin	3	I	10754961	G	GG/AG	1	AG/AG	3.9e-12	0	0	46	0	38	1	38	0	46	77	C>T	AAGCGTT	R13H8.1	Transcribed
CD0024a	csb-1	Aflatoxin	3	II	10687464	G	GG/GT	1	GT/GT	8.6e-08	0	0	31	0	0	0	43	44	31	87	C>A	GTTCCAG	D2089.4	Transcribed
CD0024a	csb-1	Aflatoxin	3	II	3616852	T	TT/GT	1	TT/TT	4.5e-05	0	1	0	36	0	0	8	32	37	40	T>G	GAGTGGG	No_gene	No_gene
CD0024a	csb-1	Aflatoxin	3	III	1839009	C	CC/CG	1	CG/CG	1.4e-13	0	51	0	0	0	17	23	0	51	40	C>G	TGTCGTG	Y39A3CL.1	Non-transcribed
CD0024a	csb-1	Aflatoxin	3	IV	957987	A	AA/AC	0.99	AA/AA	0.0061	30	0	0	0	36	10	0	0	30	46	T>G	GGGTAGA	No_gene	No_gene
CD0024a	csb-1	Aflatoxin	3	X	2729166	G	GG/GT	1	GT/GT	2.3e-09	1	0	36	0	0	0	30	27	37	57	C>A	CAGCAGT	T02C5.5	Non-transcribed
CD0024a	csb-1	Aflatoxin	3	X	15506957	T	TT/GT	0.92	TT/TT	0.076	0	0	0	27	0	0	9	30	27	39	T>G	GTGTGGA	H13N06.5	Transcribed
CD0024a	csb-1	Aflatoxin	3	V	19519362	G	GG/AG	1	AG/AG	2.3e-08	0	0	33	0	15	5	12	0	33	32	C>T	TTTCGGG	Y43F8B.3	Transcribed
CD0024a	csb-1	Aflatoxin	3	V	1867047	A	AA/AC	0.93	AA/AA	0.071	40	0	0	0	42	11	0	0	40	53	T>G	CGGTGAG	T10B5.3	Non-transcribed
CD0024c	csb-1	Aflatoxin	3	III	2148945	A	AA/AG	1	AG/AG	8e-10	38	0	0	0	31	0	23	0	38	54	T>C	CCTTCAT	Y48G9A.4	Transcribed
CD0024c	csb-1	Aflatoxin	3	IV	14882446	C	CC/CT	1	CT/CT	1.4e-13	0	51	0	0	0	18	0	17	51	35	C>T	TGCCGCA	Y57G11C.24	Non-transcribed
CD0024c	csb-1	Aflatoxin	3	IV	13198903	T	TT/GT	0.97	TT/TT	0.027	0	0	0	37	0	0	11	35	37	46	T>G	GGGTGAT	No_gene	No_gene
CD0024c	csb-1	Aflatoxin	3	IV	1073790	C	CC/CT	1	CT/CT	3e-09	0	36	0	0	0	23	0	18	36	41	C>T	ATGCTGT	No_gene	No_gene
CD0024c	csb-1	Aflatoxin	3	V	18441106	G	GG/AG	1	AG/AG	3.1e-09	0	0	36	0	26	0	30	0	36	56	C>T	TCGCCTT	ZK262.9	Transcribed
CD0024c	csb-1	Aflatoxin	3	V	20008273	G	GG/GT	1	GT/GT	1.1e-08	0	0	34	0	0	0	13	15	34	28	C>A	GAGCCAT	Y60A3A.23	Transcribed
CD0024c	csb-1	Aflatoxin	3	V	15768382	G	GG/GT	1	GT/GT	8e-10	0	0	38	0	0	0	28	15	38	43	C>A	TAGCCAA	No_gene	No_gene
CD0024c	csb-1	Aflatoxin	3	V	16389122	G	GG/GT	1	GT/GT	2.3e-17	0	0	64	0	0	0	32	29	64	61	C>A	AAGCTCA	No_gene	No_gene
CD0024c	csb-1	Aflatoxin	3	I	2181206	T	TT/CC	0.7	TT/CT	0.17	0	0	0	51	0	2	0	0	51	2	T>C	TATTATA	W03F11.6	Non-transcribed
CD0024d	csb-1	Aflatoxin	3	II	13386006	C	CC/AC	1	AC/AC	6e-09	0	35	0	0	21	19	1	0	35	41	C>A	CGGCCCT	Y48C3A.12	Non-transcribed
CD0024d	csb-1	Aflatoxin	3	II	394281	G	GG/CG	1	CG/CG	1.4e-12	0	0	47	1	0	18	16	0	48	34	C>G	GCTCACT	No_gene	No_gene
CD0024d	csb-1	Aflatoxin	3	II	9887226	T	TT/AT	1	AT/AT	2.9e-11	0	0	0	43	20	2	0	34	43	56	T>A	AACTCTC	C08H9.2	Transcribed
CD0024d	csb-1	Aflatoxin	3	II	11234774	C	CC/AC	1	AC/AC	2.1e-10	0	40	0	0	11	27	0	0	40	38	C>A	ATTCCAA	T06D8.5	Transcribed
CD0024d	csb-1	Aflatoxin	3	II	11314022	C	CC/CT	1	CT/CT	4.4e-08	0	32	0	0	7	28	0	10	32	45	C>T	CAACCCC	T24F1.4	Transcribed
CD0024d	csb-1	Aflatoxin	3	II	11435884	C	CC/AC	1	AC/AC	4.1e-10	0	39	0	0	26	36	0	0	39	62	C>A	TTTCCAG	VW02B12L.1	Transcribed
CD0024d	csb-1	Aflatoxin	3	II	11766332	C	CC/AC	1	AC/AC	5.5e-11	0	42	0	0	14	23	0	0	42	37	C>A	GATCTGA	No_gene	No_gene
CD0024d	csb-1	Aflatoxin	3	II	2854707	C	CC/AC	1	AC/AC	2e-12	0	47	0	0	13	19	0	0	47	32	C>A	CAACCAC	No_gene	No_gene
CD0024d	csb-1	Aflatoxin	3	II	4381659	G	GG/AG	1	AG/AG	1.5e-11	0	0	44	0	23	0	20	0	44	43	C>T	AGGCGCA	B0286.1	Transcribed
CD0024d	csb-1	Aflatoxin	3	III	11021694	G	GG/CG	1	CG/CG	1.7e-07	0	0	30	0	0	9	30	0	30	39	C>G	AAGCTTG	Y48A6B.6	Transcribed
CD0024d	csb-1	Aflatoxin	3	III	5417487	G	GG/GT	1	GT/GT	4.4e-08	0	0	32	0	0	0	29	12	32	41	C>A	GTACCCC	W03A5.7	Non-transcribed
CD0024d	csb-1	Aflatoxin	3	III	664072	G	GG/GT	1	GT/GT	3e-09	0	0	36	0	0	0	38	15	36	53	C>A	CAACTAG	C09F5.3	Non-transcribed
CD0024d	csb-1	Aflatoxin	3	III	727385	G	GG/GT	1	GT/GT	1.1e-10	0	0	41	0	0	0	35	24	41	59	C>A	GTGCCAC	T17H7.4	Non-transcribed
CD0024d	csb-1	Aflatoxin	3	V	16626776	G	GG/GT	1	GT/GT	1.2e-06	0	0	27	0	0	0	8	16	27	24	C>A	CGGCCGC	W06G6.1	Non-transcribed
CD0024d	csb-1	Aflatoxin	3	V	12068191	G	GG/GT	1	GT/GT	7.8e-12	0	0	45	0	0	0	27	23	45	50	C>A	CGGCAAA	No_gene	No_gene
CD0024d	csb-1	Aflatoxin	3	V	17480879	G	GG/GT	1	GT/GT	2.9e-11	0	0	43	0	0	0	20	27	43	47	C>A	TTGCAAC	F08E10.5	Non-transcribed
CD0024d	csb-1	Aflatoxin	3	V	14341426	G	GG/GT	1	GT/GT	9.6e-15	0	0	55	0	0	0	27	18	55	45	C>A	GTGCGCA	No_gene	No_gene
CD0024d	csb-1	Aflatoxin	3	V	4428310	A	AA/AT	1	AT/AT	4.9e-09	35	1	0	0	29	0	0	20	36	49	T>A	AGGTGTA	No_gene	No_gene
CD0024d	csb-1	Aflatoxin	3	V	1721244	G	GG/GT	1	GT/GT	5.2e-13	0	0	49	0	0	0	23	18	49	41	C>A	GTGCGCT	ZK697.12	Transcribed
CD0024d	csb-1	Aflatoxin	3	V	2573047	G	GG/GT	1	GT/GT	1.1e-10	0	0	41	0	0	0	19	23	41	42	C>A	GCGCGTC	Y45G12C.15	Non-transcribed
CD0024d	csb-1	Aflatoxin	3	V	3166909	G	GG/GT	1	GT/GT	2.8e-11	0	0	43	0	0	0	20	22	43	42	C>A	TGCCGGA	C36C5.4	Transcribed
CD0024d	csb-1	Aflatoxin	3	IV	2055902	A	AA/AG	1	AG/AG	8e-10	38	0	0	0	14	0	9	0	38	23	T>C	ACTTTCC	R05C11.4	Transcribed
CD0024d	csb-1	Aflatoxin	3	IV	2348404	C	CC/AC	1	AC/AC	2.7e-13	0	50	0	0	11	8	0	0	50	19	C>A	AAGCCAT	Y38F2AR.7	Transcribed
CD0024d	csb-1	Aflatoxin	3	IV	6446781	C	CC/AC	1	AC/AC	1.1e-10	0	41	0	0	10	6	0	0	41	16	C>A	GCCCATT	Y73B6BL.26	Transcribed
CD0024d	csb-1	Aflatoxin	3	IV	842260	C	CC/CT	1	CT/CT	6.4e-15	0	56	1	0	0	12	0	14	57	26	C>T	TCGCGCG	No_gene	No_gene
CD0024d	csb-1	Aflatoxin	3	IV	869744	C	CC/AC	1	AC/AC	3.1e-09	0	36	0	0	20	18	0	0	36	38	C>A	AAGCCTA	Y55F3BR.2	Non-transcribed
CD0024d	csb-1	Aflatoxin	3	IV	9081279	C	CC/CT	1	CT/CT	1.1e-10	0	41	0	0	0	20	0	20	41	40	C>T	GGTCACA	No_gene	No_gene
CD0024d	csb-1	Aflatoxin	3	IV	3894301	C	CC/CG	1	CG/CG	1.5e-11	0	44	0	0	1	14	21	0	44	36	C>G	CCCCGAC	F56D6.8	Transcribed
CD0024d	csb-1	Aflatoxin	3	IV	10038187	C	CC/AC	1	AC/AC	2e-12	0	47	0	0	25	24	0	0	47	49	C>A	GAGCTTC	F44D12.11	Transcribed
CD0024d	csb-1	Aflatoxin	3	IV	4518939	C	CC/AC	1	AC/AC	1e-12	0	48	0	0	26	20	0	0	48	46	C>A	TCACGGC	No_gene	No_gene
CD0024d	csb-1	Aflatoxin	3	IV	4884882	C	CC/AC	1	AC/AC	1e-12	0	48	0	0	17	13	0	0	48	30	C>A	TTCCTGA	T08B6.6	Non-transcribed
CD0024d	csb-1	Aflatoxin	3	IV	11787589	T	TT/GT	1	GT/GT	2.4e-08	0	0	0	33	0	0	11	29	33	40	T>G	AGGTGGT	H01G02.3	Transcribed
CD0024d	csb-1	Aflatoxin	3	IV	14377560	C	CC/AC	1	AC/AC	2.3e-08	0	33	0	0	13	10	0	0	33	23	C>A	GTGCGTC	Y67A10A.7	Non-transcribed
CD0024d	csb-1	Aflatoxin	3	I	9741582	C	CC/CT	1	CT/CT	3e-09	0	36	0	0	0	22	0	15	36	37	C>T	CATCGAT	K02A11.1	Non-transcribed
CD0024d	csb-1	Aflatoxin	3	I	11654603	C	CC/CG	1	CG/CG	1.1e-08	0	34	0	0	0	10	14	0	34	24	C>G	ATGCCCT	No_gene	No_gene
CD0024d	csb-1	Aflatoxin	3	I	11982011	C	CC/AC	1	AC/AC	1e-09	0	38	1	0	23	20	0	0	39	43	C>A	CTGCCAA	Y53C10A.4	Non-transcribed
CD0024d	csb-1	Aflatoxin	3	I	7245661	C	CC/AC	1	AC/AC	1.6e-09	0	37	0	0	31	28	0	0	37	59	C>A	CTGCTGT	R06C7.4	Non-transcribed
CD0024d	csb-1	Aflatoxin	3	I	7390580	C	CC/CT	1	CT/CT	1e-12	0	48	0	0	0	12	0	20	48	32	C>T	CGTCCAA	C15A11.3	Transcribed
CD0024d	csb-1	Aflatoxin	3	I	3062630	G	GG/CG	1	CG/CG	1.1e-10	0	0	41	0	0	17	15	0	41	32	C>G	TCCCGGC	Y54E10BR.1	Transcribed
CD0024d	csb-1	Aflatoxin	3	I	4124637	A	AA/AC	1	AA/AA	0.0023	19	0	0	0	15	6	1	0	19	22	T>G	AGGTGGA	H31G24.1	Transcribed
CD0024d	csb-1	Aflatoxin	3	I	4708514	C	CC/AC	1	CC/CC	4.8e-07	0	59	0	0	6	14	0	0	59	20	C>A	TGTCAAA	W09C3.3	Non-transcribed
CD0024d	csb-1	Aflatoxin	3	I	4708590	A	AA/AT	1	AT/AT	4.1e-10	39	0	0	0	11	0	0	16	39	27	T>A	ATATGAA	W09C3.3	Transcribed
CD0024d	csb-1	Aflatoxin	3	I	1528709	G	GG/CG	1	CG/CG	5.1e-13	0	0	49	0	0	13	13	0	49	26	C>G	AAACTTG	No_gene	No_gene
CD0024d	csb-1	Aflatoxin	3	I	6812458	C	CC/AC	1	AC/AC	1e-12	0	48	0	0	21	29	0	0	48	50	C>A	AAGCGAA	No_gene	No_gene
CD0024d	csb-1	Aflatoxin	3	X	17331824	G	GG/AG	1	AG/AG	3.4e-16	0	0	60	0	24	0	17	0	60	41	C>T	TTCCTCC	No_gene	No_gene
CD0024d	csb-1	Aflatoxin	3	X	17612259	G	GG/GT	1	GT/GT	8e-10	0	0	38	0	0	0	18	21	38	39	C>A	AAGCATA	No_gene	No_gene
CD0024d	csb-1	Aflatoxin	3	X	3958385	G	GG/AG	1	AG/AG	1.7e-16	0	0	61	0	25	0	20	0	61	45	C>T	ACGCGTC	No_gene	No_gene
CD0024d	csb-1	Aflatoxin	3	X	9679543	C	CC/CT	1	CT/CT	2.4e-11	1	43	0	0	0	26	0	20	44	46	C>T	AAACGAT	C43C3.1	Transcribed
CD0024d	csb-1	Aflatoxin	3	X	14638231	T	TT/GT	1	GT/GT	1e-12	0	0	0	48	0	0	18	15	48	33	T>G	ATCTGGA	No_gene	No_gene
CD0024d	csb-1	Aflatoxin	3	X	70287	T	TT/CC	0.8	TT/CT	0.19	0	0	0	46	0	2	0	0	46	2	T>C	AAATTCC	Y73B3A.17	Transcribed
CD0024d	csb-1	Aflatoxin	3	X	686957	G	GG/AG	1	AG/AG	1.8e-14	0	0	54	0	22	0	21	0	54	43	C>T	TCTCATA	No_gene	No_gene
CD0024d	csb-1	Aflatoxin	3	X	12384254	G	GG/GT	1	GT/GT	2.6e-13	0	0	50	0	0	0	9	11	50	20	C>A	CCCCTTA	No_gene	No_gene
CD0025a	xpc-1	Aflatoxin	3	II	5437379	C	CC/AC	1	AC/AC	9.4e-15	0	55	0	0	32	29	0	0	55	61	C>A	GCGCGAA	No_gene	No_gene
CD0025a	xpc-1	Aflatoxin	3	II	11825703	T	TT/GT	1	GT/GT	2.7e-13	0	0	0	50	0	0	12	27	50	39	T>G	TGTTCAG	No_gene	No_gene
CD0025a	xpc-1	Aflatoxin	3	II	12228689	T	TT/AA	0.79	TT/AT	0.19	0	0	0	33	2	0	0	0	33	2	T>A	TTTTCTG	Y57A10A.20	Non-transcribed
CD0025a	xpc-1	Aflatoxin	3	II	12308915	G	GG/GT	1	GT/GT	6.4e-07	0	0	28	0	0	0	13	11	28	24	C>A	GTGCATA	C50E10.2	Non-transcribed
CD0025a	xpc-1	Aflatoxin	3	I	696308	C	CC/CT	1	CT/CT	7.5e-08	1	31	0	0	0	28	0	26	32	54	C>T	ACGCGAC	Y18H1A.2	Transcribed
CD0025a	xpc-1	Aflatoxin	3	I	7553997	A	AA/AT	1	AT/AT	2.6e-13	50	0	0	0	13	0	0	22	50	35	T>A	TCTTGTT	T25G3.1	Transcribed
CD0025a	xpc-1	Aflatoxin	3	I	8426840	G	GG/GT	1	GT/GT	9.5e-15	0	0	55	0	0	0	32	23	55	55	C>A	AACCGGT	No_gene	No_gene
CD0025a	xpc-1	Aflatoxin	3	I	13361052	G	GG/TT	0.66	GG/GG	0.18	0	0	31	0	0	0	0	2	31	2	C>A	ATTCAAA	Y40B1A.4	Non-transcribed
CD0025a	xpc-1	Aflatoxin	3	I	4765563	G	GG/GT	1	GT/GT	1.7e-07	0	0	30	0	0	0	29	12	30	41	C>A	AAGCTGG	No_gene	No_gene
CD0025a	xpc-1	Aflatoxin	3	III	2803776	G	GG/GT	1	GT/GT	1.1e-10	0	0	41	0	0	0	34	27	41	61	C>A	ACGCGAC	No_gene	No_gene
CD0025a	xpc-1	Aflatoxin	3	III	3152129	G	GG/GT	1	GT/GT	1.1e-10	0	0	41	0	0	0	24	23	41	47	C>A	ATTCCAT	No_gene	No_gene
CD0025a	xpc-1	Aflatoxin	3	III	11964203	T	TT/AA	0.8	TT/AT	0.19	0	0	0	46	2	0	0	0	46	2	T>A	ATTTTTT	Y56A3A.28	Transcribed
CD0025a	xpc-1	Aflatoxin	3	III	6053794	G	GG/TT	1	GT/TT	2.1e-10	0	0	40	0	0	0	0	90	40	90	C>A	AGCCCCA	F40H6.5	Non-transcribed
CD0025a	xpc-1	Aflatoxin	3	IV	10547523	T	TT/GG	1	GT/GG	2.3e-10	1	0	0	40	0	0	73	0	41	73	T>G	ACTTCGA	T07G12.6	Non-transcribed
CD0025a	xpc-1	Aflatoxin	3	IV	10759685	G	GG/AA	1	AG/AA	2e-12	0	0	47	0	94	0	0	1	47	95	C>T	TAGCCAA	T25B9.6	Transcribed
CD0025a	xpc-1	Aflatoxin	3	IV	7790513	G	GG/GT	1	GT/GT	2.1e-10	0	0	40	0	0	0	56	45	40	101	C>A	ATGCCTT	C33H5.12	Non-transcribed
CD0025a	xpc-1	Aflatoxin	3	IV	15074715	G	GG/AA	1	AG/AA	5.2e-13	0	0	49	0	65	0	0	0	49	65	C>T	ACACTGC	Y41E3.23	Transcribed
CD0025a	xpc-1	Aflatoxin	3	IV	12833892	G	GG/GT	1	GT/GT	1.5e-11	0	0	44	0	0	0	40	23	44	63	C>A	GAGCAGC	No_gene	No_gene
CD0025a	xpc-1	Aflatoxin	3	IV	2510728	A	AA/GG	0.69	AA/AG	0.17	30	0	0	0	0	0	2	0	30	2	T>C	TATTTGC	Y69A2AR.16	Transcribed
CD0025a	xpc-1	Aflatoxin	3	V	20279221	C	CC/AC	1	AC/AC	2.9e-11	0	43	0	0	25	21	0	0	43	46	C>A	ACTCGGC	ZC15.8	Transcribed
CD0025a	xpc-1	Aflatoxin	3	V	19629621	G	GG/AG	1	AG/AG	3.4e-16	0	0	60	0	26	0	79	0	60	105	C>T	TCCCCCA	Y43F8C.4	Transcribed
CD0025a	xpc-1	Aflatoxin	3	X	5483816	G	GG/AG	1	AG/AG	3.6e-14	0	0	53	0	30	0	43	0	53	73	C>T	TCACTGA	C25F6.2	Transcribed
CD0025a	xpc-1	Aflatoxin	3	X	9907648	G	GG/AG	1	AG/AG	7.6e-12	0	0	45	0	40	0	24	0	45	64	C>T	CTGCTCT	F21G4.5	Transcribed
CD0025a	xpc-1	Aflatoxin	3	X	11405212	C	CC/AC	1	AC/AC	3.2e-11	0	43	0	0	44	31	0	0	43	75	C>A	AGCCTTG	F08B12.10	Transcribed
CD0025a	xpc-1	Aflatoxin	3	X	3126749	C	CC/AC	1	AC/AC	4.1e-10	0	39	0	0	29	29	0	0	39	58	C>A	GAGCTGT	K10B3.10	Transcribed
CD0025a	xpc-1	Aflatoxin	3	X	3166241	C	CC/CG	1	CG/CG	1.1e-10	0	41	0	0	0	29	41	0	41	70	C>G	ACACTAG	C15C7.7	Non-transcribed
CD0025a	xpc-1	Aflatoxin	3	X	754299	G	GG/GT	1	GT/GT	6.9e-14	0	0	52	0	0	0	21	44	52	65	C>A	ATGCTGC	C02H7.3	Non-transcribed
CD0025a	xpc-1	Aflatoxin	3	X	4432940	C	CC/AC	1	AC/AC	8e-10	0	38	0	0	22	28	0	0	38	50	C>A	CCACGGT	F15A8.6	Transcribed
CD0025a	xpc-1	Aflatoxin	3	X	6837323	G	GG/CG	1	CG/CG	7.4e-10	0	0	38	1	0	27	20	0	39	47	C>G	GGGCAAC	F41B4.4	Non-transcribed
CD0025c	xpc-1	Aflatoxin	3	X	16031405	C	CC/AC	1	AC/AC	2e-12	0	47	0	0	19	30	0	3	47	52	C>A	CTACTTT	B0395.2	Non-transcribed
CD0025c	xpc-1	Aflatoxin	3	X	14066641	G	GG/TT	1	GT/TT	1.7e-12	0	0	56	1	0	0	0	70	57	70	C>A	GAACTTT	C33G3.3	Non-transcribed
CD0025c	xpc-1	Aflatoxin	3	X	7215105	C	CC/CT	1	CT/CT	4.1e-10	0	39	0	0	14	39	0	27	39	80	C>T	AAGCCCC	ZK867.18	Non-transcribed
CD0025c	xpc-1	Aflatoxin	3	X	11826357	C	CC/CT	1	CT/CT	1.1e-10	0	41	0	0	9	39	0	15	41	63	C>T	TTGCGGG	C34E11.3	Non-transcribed
CD0025c	xpc-1	Aflatoxin	3	I	6194857	G	GG/GT	1	GT/GT	3.8e-12	0	0	46	0	0	0	32	38	46	70	C>A	CTGCTGT	T05E7.4	Non-transcribed
CD0025c	xpc-1	Aflatoxin	3	I	6547478	G	GG/GT	1	GT/GT	1.7e-07	0	0	30	0	0	0	32	43	30	75	C>A	TTGCTGA	T10E9.9	Non-transcribed
CD0025c	xpc-1	Aflatoxin	3	I	11670212	G	GG/GT	1	GT/GT	1.3e-08	0	0	34	0	0	0	26	35	34	61	C>A	GGACGGC	No_gene	No_gene
CD0025c	xpc-1	Aflatoxin	3	IV	12017008	A	AA/AG	1	AG/AG	4.1e-10	39	0	0	0	22	0	48	1	39	71	T>C	AAATGAG	No_gene	No_gene
CD0025c	xpc-1	Aflatoxin	3	V	12288028	G	GG/AG	1	AG/AG	1e-12	0	0	48	0	37	0	28	0	48	65	C>T	TGCCTAA	F55C5.7	Non-transcribed
CD0025c	xpc-1	Aflatoxin	3	V	15534743	G	GG/GT	1	GT/GT	4.1e-10	0	0	39	0	0	0	36	21	39	57	C>A	TTGCCTA	No_gene	No_gene
CD0025c	xpc-1	Aflatoxin	3	III	6558344	C	CC/AC	1	AC/AC	1e-12	0	48	0	0	34	41	0	0	48	75	C>A	AAGCACC	C09E7.8	Transcribed
CD0025c	xpc-1	Aflatoxin	3	II	12348284	C	CC/CT	1	CT/CT	2.8e-07	1	29	0	0	0	24	0	27	30	51	C>T	GCGCCTG	C44C11.1	Transcribed
CD0025c	xpc-1	Aflatoxin	3	II	2713709	C	CC/AC	1	AC/AC	2.8e-13	0	50	0	0	22	20	0	0	50	42	C>A	CCTCAGC	No_gene	No_gene
CD0025c	xpc-1	Aflatoxin	3	II	2713730	G	GG/GT	1	GT/GT	2.7e-13	0	0	50	0	1	0	22	17	50	40	C>A	ATTCTTA	No_gene	No_gene
CD0025d	xpc-1	Aflatoxin	3	I	4424063	G	GG/AG	1	AG/AG	1.1e-10	0	0	41	0	13	0	13	0	41	26	C>T	TTGCGTC	C11D9.1	Transcribed
CD0025d	xpc-1	Aflatoxin	3	I	8910879	G	GG/AG	1	AG/AG	7.5e-12	0	0	45	0	17	0	20	0	45	37	C>T	AAGCAGG	T08G11.1	Non-transcribed
CD0025d	xpc-1	Aflatoxin	3	III	2193343	T	TT/AT	1	AT/AT	1.6e-09	0	0	0	37	13	0	0	21	37	34	T>A	CCCTGAA	Y48G9A.3	Non-transcribed
CD0025d	xpc-1	Aflatoxin	3	III	3617396	C	CC/CT	1	CT/CT	2.1e-10	0	40	0	0	0	15	0	13	40	28	C>T	TTACGCG	C32A3.1	Transcribed
CD0025d	xpc-1	Aflatoxin	3	II	9782519	G	GG/AG	1	AG/AG	3.4e-16	0	0	60	0	16	0	24	0	60	40	C>T	AAGCCTG	No_gene	No_gene
CD0025d	xpc-1	Aflatoxin	3	V	15915412	A	AA/AT	1	AT/AT	2.7e-13	50	0	0	0	12	0	0	13	50	25	T>A	TCTTGGT	F35E8.8	Non-transcribed
CD0025d	xpc-1	Aflatoxin	3	V	15915413	A	AA/AC	1	AC/AC	2.7e-13	50	0	0	0	12	12	0	0	50	24	T>G	TTCTTGG	F35E8.8	Non-transcribed
CD0025d	xpc-1	Aflatoxin	3	V	189672	C	CC/AC	1	AC/AC	3.2e-09	0	36	0	0	11	18	0	0	36	29	C>A	CATCAAT	Y108G3AL.7	Non-transcribed
CD0025d	xpc-1	Aflatoxin	3	IV	1109409	C	CC/CT	1	CT/CT	5.2e-13	0	49	0	0	0	15	0	15	49	30	C>T	TGACTGG	C44B12.2	Non-transcribed
CD0025d	xpc-1	Aflatoxin	3	IV	2740252	T	TT/AT	1	AT/AT	4.4e-08	0	0	0	32	16	0	0	23	32	39	T>A	ACATTTT	Y94H6A.t1	Non-transcribed
CD0025d	xpc-1	Aflatoxin	3	IV	2740254	T	TT/AT	1	AT/AT	1.7e-07	0	0	0	30	15	0	0	23	30	38	T>A	ATTTTGG	Y94H6A.t1	Non-transcribed
CD0025d	xpc-1	Aflatoxin	3	IV	9244950	C	CC/AC	1	AC/AC	1.9e-14	0	54	0	0	15	21	0	0	54	36	C>A	CATCAGC	Y11D7A.5	Transcribed
CD0025d	xpc-1	Aflatoxin	3	IV	12003105	G	GG/GT	1	GT/GT	6.6e-16	0	0	59	0	0	0	23	18	59	41	C>A	AAGCGTG	ZK617.1	Non-transcribed
CD0025d	xpc-1	Aflatoxin	3	IV	6820709	C	CC/CT	1	CT/CT	1.1e-10	0	41	0	0	0	15	0	17	41	32	C>T	TATCTAC	No_gene	No_gene
CD0025d	xpc-1	Aflatoxin	3	IV	6820764	A	AA/AT	1	AT/AT	3e-09	36	0	0	0	15	0	0	11	36	26	T>A	GCCTATC	No_gene	No_gene
CD0025d	xpc-1	Aflatoxin	3	X	6576	C	CC/CT	1	CT/CT	8.2e-19	0	69	0	0	0	32	0	31	69	63	C>T	ATTCACC	CE7X_3.1	Non-transcribed
CD0025d	xpc-1	Aflatoxin	3	X	8004674	C	CC/CT	1	CT/CT	5.5e-11	0	42	0	0	0	17	0	9	42	26	C>T	CTTCCAA	No_gene	No_gene
CD0025d	xpc-1	Aflatoxin	3	X	13860020	C	CC/CT	1	CT/CT	1e-12	0	48	0	0	0	13	0	26	48	39	C>T	TGGCATG	M03B6.4	Non-transcribed
CD0026a	xpf-1	Aflatoxin	3	V	733521	C	CC/AC	1	AC/AC	5.5e-11	0	42	0	0	42	32	0	0	42	74	C>A	CTACCGA	C05E4.14	Non-transcribed
CD0026a	xpf-1	Aflatoxin	3	V	953075	C	CC/AC	1	CC/CC	4.3e-08	0	51	0	0	6	10	0	0	51	16	C>A	AAGCGGG	Y50D4C.4	Transcribed
CD0026a	xpf-1	Aflatoxin	3	V	1914246	T	TT/AA	0.81	TT/AT	0.19	0	0	0	47	2	0	0	0	47	2	T>A	ATTTTCC	Y32G9A.10	Transcribed
CD0026a	xpf-1	Aflatoxin	3	V	5167635	C	CC/CT	1	CT/CT	1.7e-07	0	30	0	0	0	47	0	34	30	81	C>T	ATGCGTT	No_gene	No_gene
CD0026a	xpf-1	Aflatoxin	3	V	6952253	G	GG/AG	1	AG/AG	6.9e-14	0	0	52	0	32	0	63	0	52	95	C>T	TAGCGGT	T07H8.5	Non-transcribed
CD0026a	xpf-1	Aflatoxin	3	II	4459736	C	CC/CT	1	CT/CT	3e-09	0	36	0	0	0	23	0	37	36	60	C>T	CTTCAAT	T12C9.7	Transcribed
CD0026a	xpf-1	Aflatoxin	3	II	7952431	C	CC/AC	1	AC/AC	5.7e-11	0	42	0	0	34	40	0	0	42	74	C>A	TTTCTCG	No_gene	No_gene
CD0026a	xpf-1	Aflatoxin	3	II	8015900	C	CC/AC	1	AC/AC	1.5e-11	0	44	0	0	52	35	0	0	44	87	C>A	GATCGGA	No_gene	No_gene
CD0026a	xpf-1	Aflatoxin	3	II	13174539	C	CC/AC	1	AC/AC	1.8e-05	0	23	0	0	37	39	0	0	23	76	C>A	ATCCCTC	No_gene	No_gene
CD0026a	xpf-1	Aflatoxin	3	II	13268739	C	CC/GG	1	CG/GG	5.5e-11	0	42	0	0	0	0	53	0	42	53	C>G	TTACTAG	No_gene	No_gene
CD0026a	xpf-1	Aflatoxin	3	III	12831063	A	AA/TT	0.81	AA/AT	0.19	42	0	0	0	0	0	0	2	42	2	T>A	TTCTAAA	Y37D8A.3	Transcribed
CD0026a	xpf-1	Aflatoxin	3	IV	7919194	G	GG/AG	1	AG/AG	3.6e-14	0	0	53	0	68	0	48	0	53	116	C>T	GTTCTCT	C49H3.10	Non-transcribed
CD0026a	xpf-1	Aflatoxin	3	IV	8716550	G	GG/GT	1	GT/GT	9.3e-15	0	0	55	0	0	0	58	61	55	119	C>A	ATTCCAA	H23L24.2	Transcribed
CD0026a	xpf-1	Aflatoxin	3	X	13812617	C	CC/CT	1	CT/CT	1.2e-08	0	34	0	0	0	10	0	13	34	23	C>T	ACGCAGT	No_gene	No_gene
CD0026a	xpf-1	Aflatoxin	3	X	3349088	C	CC/AC	1	AC/AC	3e-09	0	36	0	0	21	22	0	0	36	43	C>A	AGGCTCA	ZK816.4	Transcribed
CD0026a	xpf-1	Aflatoxin	3	X	8472659	C	CC/AA	1	AC/AA	5.9e-09	0	35	0	0	65	0	0	0	35	65	C>A	AAACAAT	No_gene	No_gene
CD0026a	xpf-1	Aflatoxin	3	X	12644331	T	TT/CT	1	CT/CT	2.7e-13	0	0	0	50	0	43	0	42	50	85	T>C	TCTTTGA	No_gene	No_gene
CD0026a	xpf-1	Aflatoxin	3	I	4213476	G	GG/GT	1	GT/GT	0.00026	0	0	19	0	0	0	20	27	19	47	C>A	TGGCCAA	C18E3.1	Transcribed
CD0026a	xpf-1	Aflatoxin	3	I	12494657	C	CC/CT	1	CT/CT	6.3e-07	0	28	0	0	0	18	0	20	28	38	C>T	CCACCAC	No_gene	No_gene
CD0026a	xpf-1	Aflatoxin	3	I	12494659	A	AA/AC	1	AC/AC	4.7e-06	25	0	0	0	17	19	0	0	25	36	T>G	CAGTGGT	No_gene	No_gene
CD0026a	xpf-1	Aflatoxin	3	I	12494735	A	AA/AT	1	AT/AT	1.8e-05	23	0	0	0	24	0	0	24	23	48	T>A	AATTTGA	No_gene	No_gene
CD0026a	xpf-1	Aflatoxin	3	I	5631758	C	CC/AC	1	AC/AC	8.1e-10	0	38	0	0	22	18	0	0	38	40	C>A	TTGCTTA	F46F11.1	Non-transcribed
CD0026a	xpf-1	Aflatoxin	3	I	1909339	G	GG/TT	0.65	GG/GG	0.2	0	0	53	0	0	0	0	2	53	2	C>A	TTCCAAT	Y71G12A.2	Transcribed
CD0026a	xpf-1	Aflatoxin	3	I	10444051	C	CC/CT	1	CT/CT	4.4e-08	0	32	0	0	0	27	0	32	32	59	C>T	GTGCCTT	Y106G6H.6	Transcribed
CD0026a	xpf-1	Aflatoxin	3	I	14127412	C	CC/CG	1	CG/CG	1.1e-10	0	41	0	0	0	9	9	0	41	18	C>G	GTACGGA	No_gene	No_gene
CD0026a	xpf-1	Aflatoxin	3	I	14127500	C	CC/CT	1	CT/CT	0.0037	0	15	0	0	0	15	0	13	15	28	C>T	ATCCGTT	No_gene	No_gene
CD0026c	xpf-1	Aflatoxin	3	II	15068648	C	CC/AA	0.66	CC/CC	0.18	0	53	0	0	2	0	0	0	53	2	C>A	AACCATT	Y53F4B.18	Transcribed
CD0026c	xpf-1	Aflatoxin	3	II	1362278	T	TT/CC	0.77	TT/CT	0.18	0	0	0	36	0	2	0	0	36	2	T>C	TATTTTT	No_gene	No_gene
CD0026c	xpf-1	Aflatoxin	3	V	17348792	G	GG/AG	1	AG/AG	6.3e-07	0	0	28	0	36	0	35	0	28	71	C>T	TTCCTAT	F47H4.1	Non-transcribed
CD0026c	xpf-1	Aflatoxin	3	V	17348793	G	GG/AG	1	AG/AG	3.2e-07	0	0	29	0	36	0	35	0	29	71	C>T	TTTCCTA	F47H4.1	Non-transcribed
CD0026c	xpf-1	Aflatoxin	3	X	16153022	G	GG/AG	1	AG/AG	1.3e-15	0	0	58	0	14	0	26	0	58	40	C>T	CAACTTG	No_gene	No_gene
CD0026c	xpf-1	Aflatoxin	3	X	5184461	C	CC/CT	1	CT/CT	1.5e-11	0	44	0	0	0	17	0	22	44	39	C>T	TATCGGA	T03G11.9	Non-transcribed
CD0026c	xpf-1	Aflatoxin	3	III	1776059	G	GG/AG	1	AG/AG	8e-10	0	0	38	0	27	0	18	1	38	46	C>T	AGGCCAC	Y39A3CL.4	Non-transcribed
CD0026c	xpf-1	Aflatoxin	3	III	267718	G	GG/AG	1	AG/AG	1.4e-13	0	0	51	0	36	0	46	0	51	82	C>T	TATCCGA	No_gene	No_gene
CD0026c	xpf-1	Aflatoxin	3	III	11857756	T	TT/CT	1	CT/CT	5.7e-11	0	0	0	42	0	17	0	12	42	29	T>C	TAGTCTC	Y56A3A.2	Transcribed
CD0026c	xpf-1	Aflatoxin	3	III	5762742	T	TT/CT	1	CT/CT	1.6e-18	0	0	0	68	0	36	0	58	68	94	T>C	GTTTATT	B0244.2	Non-transcribed
CD0026c	xpf-1	Aflatoxin	3	III	6408836	G	GG/AG	1	AG/AG	5.2e-13	0	0	49	0	45	0	47	0	49	92	C>T	CTTCTAA	C05D11.4	Transcribed
CD0026c	xpf-1	Aflatoxin	3	I	14503542	C	CC/AA	0.66	CC/CC	0.18	0	38	0	0	2	0	0	0	38	2	C>A	AACCGAA	Y105E8A.21	Transcribed
CD0026c	xpf-1	Aflatoxin	3	I	11707570	C	CC/CG	1	CG/CG	2.1e-10	0	40	0	0	0	41	42	0	40	83	C>G	CTTCAGG	No_gene	No_gene
CD0026c	xpf-1	Aflatoxin	3	I	9670354	G	GG/GT	1	GT/GT	1.1e-10	0	0	41	0	0	0	26	59	41	85	C>A	CTGCGCT	C03D6.1	Non-transcribed
CD0026d	xpf-1	Aflatoxin	3	II	10534562	C	CC/CT	1	CT/CT	2.4e-06	0	26	0	0	0	11	0	13	26	24	C>T	ATCCTTC	R166.2	Transcribed
CD0026d	xpf-1	Aflatoxin	3	II	11497668	G	GG/AG	1	AG/AG	1.5e-11	0	0	44	0	38	0	38	0	44	76	C>T	ATTCTGG	B0334.15	Transcribed
CD0026d	xpf-1	Aflatoxin	3	II	24494	A	AA/AT	1	AT/AT	4.1e-10	39	0	0	0	42	0	0	34	39	76	T>A	ATCTACA	No_gene	No_gene
CD0026d	xpf-1	Aflatoxin	3	II	541046	G	GG/AG	1	AG/AG	1e-12	0	0	48	0	20	0	30	0	48	50	C>T	TCGCTTT	No_gene	No_gene
CD0026d	xpf-1	Aflatoxin	3	II	819893	C	CC/CT	1	CT/CT	7e-14	0	52	0	0	0	37	0	40	52	77	C>T	ACTCTGG	F46F5.7	Transcribed
CD0026d	xpf-1	Aflatoxin	3	II	6716018	C	CC/CT	1	CT/CT	5.2e-13	0	49	0	0	0	34	0	38	49	72	C>T	TATCGGT	No_gene	No_gene
CD0026d	xpf-1	Aflatoxin	3	V	5604712	C	CC/CT	1	CT/CT	3.6e-14	0	53	0	0	0	32	0	37	53	69	C>T	GCCCTTT	No_gene	No_gene
CD0026d	xpf-1	Aflatoxin	3	V	18188314	C	CC/CT	1	CT/CT	1.7e-07	0	30	0	0	0	47	0	38	30	85	C>T	CCCCCTC	No_gene	No_gene
CD0026d	xpf-1	Aflatoxin	3	V	16835445	C	CC/AC	1	AC/AC	3e-09	0	36	0	0	16	45	0	0	36	61	C>A	AACCCGG	T20B3.7	Non-transcribed
CD0026d	xpf-1	Aflatoxin	3	III	10851012	C	CC/AA	0.66	CC/CC	0.19	0	54	0	0	2	0	0	0	54	2	C>A	TTTCACA	Y39A1C.4	Non-transcribed
CD0026d	xpf-1	Aflatoxin	3	III	3527343	A	AA/GG	0.8	AA/AG	0.19	45	0	0	0	0	0	2	0	45	2	T>C	TTTTGAC	M01F1.7	Non-transcribed
CD0026d	xpf-1	Aflatoxin	3	III	7290261	C	CC/CT	1	CT/CT	3.8e-12	0	46	0	0	0	48	0	32	46	80	C>T	CTTCTCG	B0361.8	Transcribed
CD0026d	xpf-1	Aflatoxin	3	I	414	A	AA/AC	1	AC/AC	1.2e-06	27	0	0	0	46	48	0	0	27	94	T>G	GGCTTAG	No_gene	No_gene
CD0026d	xpf-1	Aflatoxin	3	I	1691865	G	GG/AG	1	AG/AG	2.1e-10	0	0	40	0	28	0	27	0	40	55	C>T	TTTCAGC	Y71G12B.31	Non-transcribed
CD0026d	xpf-1	Aflatoxin	3	IV	14081270	G	GG/AG	1	AG/AG	8.1e-10	0	0	38	0	34	0	26	0	38	60	C>T	CTTCATT	F52B11.1	Transcribed
CD0026d	xpf-1	Aflatoxin	3	IV	6238107	C	CC/CG	1	CG/CG	3.8e-12	0	46	0	0	0	26	29	0	46	55	C>G	CCACTTT	No_gene	No_gene
CD0026d	xpf-1	Aflatoxin	3	IV	6424335	G	GG/GT	1	GT/GT	2.1e-10	0	0	40	0	0	0	21	31	40	52	C>A	CGACAAA	No_gene	No_gene
CD0026d	xpf-1	Aflatoxin	3	IV	7229351	T	TT/CT	1	CT/CT	4.1e-10	0	0	0	39	0	28	0	32	39	60	T>C	TTTTTTT	D2024.6	Transcribed
CD0026d	xpf-1	Aflatoxin	3	IV	7397772	G	GG/GT	1	GT/GT	1.1e-10	0	0	41	0	0	0	41	38	41	79	C>A	CTCCGAA	T12B3.7	Transcribed
CD0026d	xpf-1	Aflatoxin	3	X	4885625	G	GG/GT	1	GT/GT	2.8e-11	0	0	43	0	0	0	47	44	43	91	C>A	CAGCCAG	No_gene	No_gene
CD0026d	xpf-1	Aflatoxin	3	X	5963152	C	CC/CT	1	CT/CT	2.6e-13	0	50	0	0	0	12	0	25	50	37	C>T	CACCTGT	R07E4.1	Non-transcribed
CD0026d	xpf-1	Aflatoxin	3	X	2274034	G	GG/AG	1	AG/AG	6.1e-09	0	0	35	0	48	0	43	1	35	92	C>T	TCCCATA	AH9.4	Non-transcribed
CD0026d	xpf-1	Aflatoxin	3	X	9290253	T	TT/AT	1	AT/AT	3.6e-14	0	0	0	53	25	0	0	30	53	55	T>A	AAATAGC	No_gene	No_gene
CD0027a	polq-1	Aflatoxin	3	III	1665332	C	CC/AC	1	AC/AC	9.1e-06	0	24	0	0	9	32	0	0	24	41	C>A	CGGCGTG	No_gene	No_gene
CD0027a	polq-1	Aflatoxin	3	III	8508351	T	TT/CC	0.8	TT/CT	0.19	0	0	0	41	0	2	0	0	41	2	T>C	TTTTCCG	C04D8.1	Non-transcribed
CD0027a	polq-1	Aflatoxin	3	IV	1094742	G	GG/GT	1	GT/GT	1.8e-05	0	0	23	0	0	1	27	14	23	42	C>A	TCGCTGA	Y55F3AR.2	Transcribed
CD0027a	polq-1	Aflatoxin	3	IV	14080525	G	GG/GT	1	GT/GT	4.1e-10	0	0	39	0	0	0	46	26	39	72	C>A	AAGCGAA	F52B11.1	Transcribed
CD0027a	polq-1	Aflatoxin	3	IV	11441674	G	GG/GT	1	GT/GT	7.4e-12	0	0	45	0	0	0	27	10	45	37	C>A	GATCCAA	C10C6.1	Transcribed
CD0027a	polq-1	Aflatoxin	3	IV	3859502	G	GG/GT	1	GT/GT	1.2e-06	0	0	27	0	0	0	48	16	27	64	C>A	AAGCCAA	F28F9.1	Transcribed
CD0027a	polq-1	Aflatoxin	3	I	6638731	C	CC/CT	1	CT/CT	1.5e-11	0	44	0	0	0	26	0	30	44	56	C>T	TTTCGTT	No_gene	No_gene
CD0027a	polq-1	Aflatoxin	3	I	7383221	C	CC/AC	1	AC/AC	8e-10	0	38	0	0	38	44	0	0	38	82	C>A	CGTCGTC	No_gene	No_gene
CD0027a	polq-1	Aflatoxin	3	I	7383222	G	GG/GT	1	GT/GT	2.1e-10	0	0	40	0	0	0	43	38	40	81	C>A	CGACGAC	No_gene	No_gene
CD0027a	polq-1	Aflatoxin	3	I	13101069	A	AA/TT	1	AA/AT	2.1e-15	58	0	0	0	0	0	0	47	58	47	T>A	TACTATC	No_gene	No_gene
CD0027a	polq-1	Aflatoxin	3	I	13191621	C	CC/AC	1	AC/AC	2.1e-10	0	40	0	0	13	13	0	0	40	26	C>A	AAACATC	F17B5.8	Non-transcribed
CD0027a	polq-1	Aflatoxin	3	I	13191623	T	TT/CT	1	CT/CT	2.1e-10	0	0	0	40	0	12	0	13	40	25	T>C	ACATCGT	F17B5.8	Non-transcribed
CD0027a	polq-1	Aflatoxin	3	I	1932266	G	GG/GT	0.82	GG/GG	0.18	0	0	51	0	0	0	12	4	51	16	C>A	ACCCAAT	No_gene	No_gene
CD0027a	polq-1	Aflatoxin	3	I	498608	C	CC/AC	1	AC/AC	1.7e-07	0	30	0	0	22	31	0	0	30	53	C>A	ACACGTG	Y65B4BL.3	Transcribed
CD0027a	polq-1	Aflatoxin	3	I	691477	C	CC/AC	1	AC/AC	6.1e-09	0	35	0	0	42	21	0	0	35	63	C>A	TCTCCCG	No_gene	No_gene
CD0027a	polq-1	Aflatoxin	3	II	10116535	G	GG/GT	1	GT/GT	1.4e-13	0	0	51	0	0	0	39	45	51	84	C>A	CAACCAT	ZK945.9	Non-transcribed
CD0027a	polq-1	Aflatoxin	3	II	8833103	G	GG/AG	1	AG/AG	0.0019	0	0	16	0	31	0	35	0	16	66	C>T	TCACTGG	F46C5.11	Transcribed
CD0027a	polq-1	Aflatoxin	3	II	14117409	G	GG/GT	1	GT/GT	1.5e-11	0	0	44	0	0	0	40	38	44	78	C>A	CTGCCGA	K09E4.4	Non-transcribed
CD0027a	polq-1	Aflatoxin	3	II	5955615	G	GG/AG	1	AG/AG	1.1e-10	0	0	41	0	22	0	38	0	41	60	C>T	GAGCAGC	B0034.3	Non-transcribed
CD0027a	polq-1	Aflatoxin	3	II	1091011	G	GG/AG	1	AG/AG	1e-12	0	0	48	0	25	0	22	0	48	47	C>T	CTGCGGG	No_gene	No_gene
CD0027a	polq-1	Aflatoxin	3	V	13290297	G	GG/GT	1	GT/GT	9e-17	0	0	62	0	0	0	37	28	62	65	C>A	TAGCTAT	F32F2.1	Non-transcribed
CD0027a	polq-1	Aflatoxin	3	V	10605384	C	CC/GG	1	CG/GG	3e-09	0	36	0	0	0	0	41	0	36	41	C>G	TATCTAG	H27A22.1	Non-transcribed
CD0027a	polq-1	Aflatoxin	3	V	2764548	G	GG/AG	1	AG/AG	1.6e-09	0	0	37	0	27	0	38	0	37	65	C>T	GTACGGG	R05D8.8	Non-transcribed
CD0027a	polq-1	Aflatoxin	3	V	12519421	G	GG/GT	1	GT/GT	1.8e-14	0	0	54	0	0	0	34	41	54	75	C>A	CTACTCC	No_gene	No_gene
CD0027a	polq-1	Aflatoxin	3	V	4369442	G	GG/GT	1	GT/GT	3.2e-07	0	0	29	0	0	0	43	24	29	67	C>A	TTGCGTT	F32D1.5	Non-transcribed
CD0027a	polq-1	Aflatoxin	3	V	4520298	G	GG/AG	1	AG/AG	4.4e-08	0	0	32	0	35	0	31	0	32	66	C>T	CCGCCCC	T28F12.3	Non-transcribed
CD0027a	polq-1	Aflatoxin	3	V	17344049	G	GG/AG	1	AG/AG	4.1e-10	0	0	39	0	23	0	16	0	39	39	C>T	TCCCTTG	F47H4.8	Non-transcribed
CD0027a	polq-1	Aflatoxin	3	X	11602056	C	CC/AC	1	AC/AC	1.2e-08	0	34	0	0	13	34	0	0	34	47	C>A	AAGCATA	No_gene	No_gene
CD0027a	polq-1	Aflatoxin	3	X	9719467	C	CC/AC	1	AC/AC	2e-12	0	47	0	0	25	58	0	0	47	83	C>A	GTGCAGA	F15G9.4	Non-transcribed
CD0027a	polq-1	Aflatoxin	3	X	1085567	C	CC/CT	1	CT/CT	0.00013	0	20	0	0	0	35	0	25	20	60	C>T	CGGCGCT	K03E6.7	Transcribed
CD0027a	polq-1	Aflatoxin	3	X	10646838	C	CC/CT	1	CT/CT	1.5e-11	0	44	0	0	0	73	0	20	44	93	C>T	ACACGCA	F11A1.3	Non-transcribed
CD0027a	polq-1	Aflatoxin	3	X	3528353	C	CC/TT	1	CC/CT	6.6e-08	0	44	0	0	0	0	0	23	44	23	C>T	CTTCTAT	No_gene	No_gene
CD0027a	polq-1	Aflatoxin	3	X	15886034	T	TT/AT	1	AT/AT	8e-10	0	0	0	38	7	0	0	9	38	16	T>A	CAGTGAA	F53H4.3	Transcribed
CD0027c	polq-1	Aflatoxin	3	II	15270817	G	GG/GT	1	GT/GT	1.6e-09	0	0	37	0	0	0	24	20	37	44	C>A	TAGCACT	2RSSE.1	Transcribed
CD0027c	polq-1	Aflatoxin	3	II	12029582	G	GG/TT	0.69	GG/GT	0.16	0	0	37	0	0	0	0	2	37	2	C>A	ATTCCAA	Y17G7B.9	Non-transcribed
CD0027c	polq-1	Aflatoxin	3	II	6058334	G	GG/GT	1	GT/GT	1.3e-15	0	0	58	0	0	0	47	56	58	103	C>A	TCTCAAG	R12C12.8	Non-transcribed
CD0027c	polq-1	Aflatoxin	3	II	12997435	G	GG/GT	1	GT/GT	7e-14	0	0	52	0	0	0	42	33	52	75	C>A	CTACGCC	Y38F1A.7	Non-transcribed
CD0027c	polq-1	Aflatoxin	3	III	3843385	C	CC/AC	1	AC/AC	2.3e-08	0	33	0	0	35	33	0	0	33	68	C>A	GAACCGG	C36A4.4	Transcribed
CD0027c	polq-1	Aflatoxin	3	III	559563	C	CC/CT	1	CT/CT	2.3e-08	0	33	0	0	0	24	0	28	33	52	C>T	ATGCGGG	B0353.1	Non-transcribed
CD0027c	polq-1	Aflatoxin	3	I	15034656	C	CC/CT	1	CT/CT	1.6e-09	0	37	0	0	0	49	0	45	37	94	C>T	ATGCTCA	F33H2.3	Non-transcribed
CD0027c	polq-1	Aflatoxin	3	I	11934588	C	CC/CT	1	CT/CT	8.6e-08	0	31	0	0	0	36	0	41	31	77	C>T	AGGCTTA	No_gene	No_gene
CD0027c	polq-1	Aflatoxin	3	I	1368720	A	AA/AT	1	AT/AT	0.0005	18	0	0	0	31	0	0	26	18	57	T>A	TTTTAAA	Y92H12BL.5	Transcribed
CD0027c	polq-1	Aflatoxin	3	I	9245012	C	CC/TT	1	CT/TT	2.2e-08	0	33	0	0	0	0	0	61	33	61	C>T	AAACAGG	F36H2.1	Transcribed
CD0027c	polq-1	Aflatoxin	3	I	5009045	C	CC/CT	1	CT/CT	1e-12	0	48	0	0	0	19	0	21	48	40	C>T	ATGCGAC	F54C1.1	Non-transcribed
CD0027c	polq-1	Aflatoxin	3	I	5049508	T	TT/AA	1	TT/AT	3.8e-14	0	0	0	59	43	0	0	0	59	43	T>A	CACTCCT	No_gene	No_gene
CD0027c	polq-1	Aflatoxin	3	IV	13061569	T	TT/AT	1	AT/AT	1.4e-13	0	0	0	51	19	0	0	14	51	33	T>A	ATCTAGA	No_gene	No_gene
CD0027c	polq-1	Aflatoxin	3	IV	13061571	G	GG/GT	1	GT/GT	2.6e-13	0	0	50	0	0	0	14	18	50	32	C>A	CGTCTAG	No_gene	No_gene
CD0027c	polq-1	Aflatoxin	3	IV	9953393	G	GG/AG	1	AG/AG	5.5e-11	0	0	42	0	28	0	52	0	42	80	C>T	CCTCATT	No_gene	No_gene
CD0027c	polq-1	Aflatoxin	3	IV	6121213	G	GG/GT	1	GT/GT	3.9e-12	0	0	46	0	0	0	36	24	46	60	C>A	TAGCACT	M03D4.1	Transcribed
CD0027c	polq-1	Aflatoxin	3	IV	4007519	G	GG/GT	1	GT/GT	5.9e-09	0	0	35	0	0	0	23	20	35	43	C>A	TAGCCAA	W02C12.2	Non-transcribed
CD0027c	polq-1	Aflatoxin	3	IV	4402908	G	GG/GT	1	GT/GT	1.4e-11	0	0	44	0	0	0	31	21	44	52	C>A	GGGCTAA	No_gene	No_gene
CD0027c	polq-1	Aflatoxin	3	IV	9148237	G	GG/GT	1	GT/GT	5.1e-15	0	0	56	0	0	0	58	37	56	95	C>A	CAGCGAA	F23B2.6	Transcribed
CD0027c	polq-1	Aflatoxin	3	IV	7982473	A	AA/TT	1	AA/AT	4.9e-06	38	0	0	0	0	0	0	17	38	17	T>A	ATTTAAA	No_gene	No_gene
CD0027c	polq-1	Aflatoxin	3	V	7945091	A	AA/AT	1	AT/AT	5.4e-11	42	0	1	0	24	0	0	39	43	63	T>A	AAGTCTT	Y97E10B.1	Transcribed
CD0027c	polq-1	Aflatoxin	3	V	4148211	A	AA/AT	1	AT/AT	5.5e-11	42	0	0	0	30	0	0	29	42	59	T>A	TTTTAAG	Y45G5AM.6	Non-transcribed
CD0027c	polq-1	Aflatoxin	3	V	14927762	G	GG/GT	1	GT/GT	7.5e-12	0	0	45	0	0	0	30	31	45	61	C>A	TTGCATT	W09D12.2	Non-transcribed
CD0027c	polq-1	Aflatoxin	3	V	20355951	G	GG/AG	1	AG/AG	7e-14	0	0	52	0	25	0	14	0	52	39	C>T	CATCAAC	No_gene	No_gene
CD0027c	polq-1	Aflatoxin	3	V	254182	T	TT/CC	0.8	TT/CT	0.19	0	0	0	38	0	2	0	0	38	2	T>C	TCTTGAA	R02C2.5	Transcribed
CD0027c	polq-1	Aflatoxin	3	V	1400759	G	GG/GT	1	GT/GT	8.5e-08	0	0	31	0	0	0	26	22	31	48	C>A	GCGCGTT	R12A1.2	Non-transcribed
CD0027c	polq-1	Aflatoxin	3	V	10818832	G	GG/TT	1	GT/TT	4.2e-10	0	0	39	0	0	0	0	74	39	74	C>A	GGACGAA	No_gene	No_gene
CD0027c	polq-1	Aflatoxin	3	X	60181	G	GG/CG	1	CG/CG	4.4e-08	0	0	32	0	0	23	81	0	32	104	C>G	TGTCTAG	Y73B3A.18	Transcribed
CD0027c	polq-1	Aflatoxin	3	X	5351839	C	CC/AC	1	AC/AC	3e-09	0	36	0	0	14	40	0	0	36	54	C>A	AAGCGCG	F35C8.4	Non-transcribed
CD0027d	polq-1	Aflatoxin	3	I	15020111	C	CC/AC	1	AC/AC	4.1e-10	0	39	0	0	30	26	0	0	39	56	C>A	TAGCCTG	F33H2.1	Transcribed
CD0027d	polq-1	Aflatoxin	3	I	544086	G	GG/AG	1	AG/AG	7.5e-12	0	0	45	0	29	0	22	0	45	51	C>T	GCGCTGG	No_gene	No_gene
CD0027d	polq-1	Aflatoxin	3	I	959642	G	GG/CG	1	CG/CG	6.4e-07	0	0	28	0	0	23	26	0	28	49	C>G	ATGCGGC	No_gene	No_gene
CD0027d	polq-1	Aflatoxin	3	II	12206485	C	CC/AC	1	AC/AC	8.3e-10	0	38	0	0	23	16	0	8	38	47	C>A	TCTCGGC	Y57A10A.35	Non-transcribed
CD0027d	polq-1	Aflatoxin	3	V	9467524	C	CC/CT	1	CT/CT	3e-09	0	36	0	0	0	18	0	23	36	41	C>T	TGGCTGA	No_gene	No_gene
CD0030a	N2	None	0	IV	12766369	C	CC/AA	1	AC/AA	4.1e-10	0	39	0	0	42	0	0	0	39	42	C>A	GAGCATT	No_gene	No_gene
CD0030a	N2	None	0	IV	15906507	C	CC/TT	0.99	CC/CT	0.013	0	46	0	0	0	0	0	6	46	6	C>T	TCTCTAT	No_gene	No_gene
CD0030a	N2	None	0	IV	15906509	A	AA/TT	0.99	AA/AT	0.013	46	0	0	0	0	0	0	6	46	6	T>A	TAATAGA	No_gene	No_gene
CD0030a	N2	None	0	III	1842460	T	TT/CC	1	TT/CT	1.6e-08	0	0	0	44	0	25	0	0	44	25	T>C	TTTTCCC	Y39A3CL.1	Non-transcribed
CD0030a	N2	None	0	III	1842464	G	GG/CC	1	GG/CG	7.6e-09	0	0	42	0	0	26	0	0	42	26	C>G	TTCCGGG	Y39A3CL.1	Transcribed
CD0030a	N2	None	0	III	1842465	G	GG/AA	1	GG/AG	1.8e-09	0	1	41	0	28	0	0	0	42	28	C>T	TTTCCGG	Y39A3CL.1	Transcribed
CD0030a	N2	None	0	V	20547371	G	GG/AA	1	AG/AA	2.4e-06	0	0	26	0	26	0	0	0	26	26	C>T	TCACTTC	Y38H6C.20	Non-transcribed
CD0030a	N2	None	0	V	12296829	G	GG/AA	1	AG/AA	3.6e-14	0	0	53	0	73	0	0	0	53	73	C>T	CGACAGA	No_gene	No_gene
CD0030a	N2	None	0	V	6068836	T	TT/CC	1	CT/CC	5.6e-11	0	0	0	42	0	68	0	0	42	68	T>C	AAATCAA	Y38A10A.4	Transcribed
CD0030a	N2	None	0	V	6938074	C	CC/CT	1	CT/CT	3.4e-11	0	55	0	1	0	17	0	6	56	23	C>T	TTTCGAA	No_gene	No_gene
CD0030a	N2	None	0	II	1360657	T	TT/CC	1	CT/CC	3.6e-14	0	0	0	53	0	46	0	0	53	46	T>C	TTTTTGT	No_gene	No_gene
CD0030a	N2	None	0	II	1360693	A	AA/AT	1	AA/AA	1.9e-11	52	0	0	0	28	0	0	7	52	35	T>A	CAATTTT	No_gene	No_gene
CD0030a	N2	None	0	II	1360698	A	AA/AG	1	AA/GG	3.5e-05	52	0	0	0	4	0	30	0	52	34	T>C	TTTTCCA	No_gene	No_gene
CD0030a	N2	None	0	II	12871403	C	CC/TT	0.8	CC/CT	0.19	0	42	0	0	0	0	0	2	42	2	C>T	AAACACC	Y46G5A.31	Transcribed
CD0030c	N2	None	0	IV	17233206	G	GG/TT	0.95	GG/GT	0.054	0	0	48	0	0	0	0	4	48	4	C>A	CCCCTTC	No_gene	No_gene
CD0030c	N2	None	0	III	12636425	A	AA/AC	1	AC/AC	5.2e-13	49	0	0	0	9	9	0	0	49	18	T>G	AATTTGC	Y111B2A.14	Transcribed
CD0030c	N2	None	0	III	12636426	A	AA/AC	1	AC/AC	2.7e-13	50	0	0	0	9	9	0	0	50	18	T>G	CAATTTG	Y111B2A.14	Transcribed
CD0030c	N2	None	0	III	12636437	A	AA/TT	1	AA/AT	1e-05	48	0	0	0	0	0	0	16	48	16	T>A	TTTTATT	Y111B2A.14	Transcribed
CD0030c	N2	None	0	V	11883985	T	TT/AT	1	AT/AT	3.8e-12	0	0	0	46	9	0	0	20	46	29	T>A	AGTTAAA	No_gene	No_gene
CD0030c	N2	None	0	V	12720499	G	GG/CG	1	CG/CG	2e-12	0	0	47	0	0	14	17	0	47	31	C>G	ATGCCTG	R11D1.7	Transcribed
CD0030c	N2	None	0	V	2250046	C	CC/TT	1	CC/CT	8.8e-10	0	42	0	0	0	0	0	29	42	29	C>T	GATCAGT	No_gene	No_gene
CD0030c	N2	None	0	I	8996096	A	AA/TT	1	AT/TT	1.4e-13	51	0	0	0	0	0	0	49	51	49	T>A	TTTTAAT	F32H2.9	Transcribed
CD0030c	N2	None	0	I	1089122	T	TT/AA	1	TT/AT	1.2e-11	0	0	0	48	35	0	0	0	48	35	T>A	TTGTCAA	R06A10.5	Non-transcribed
CD0030c	N2	None	0	I	13548039	C	CC/TT	1	CC/CT	1e-10	0	42	0	0	0	0	0	32	42	32	C>T	ATTCAAA	No_gene	No_gene
CD0030c	N2	None	0	II	2576981	T	TT/CT	1	CT/CT	8e-10	0	0	0	38	0	6	0	12	38	18	T>C	ATGTCTG	No_gene	No_gene
CD0030c	N2	None	0	II	10263759	T	TT/AT	1	AT/AT	1.6e-09	0	0	0	37	14	0	0	16	37	30	T>A	ATTTAAA	F54B3.1	Non-transcribed
CD0030d	N2	None	0	IV	15104139	G	GG/AA	1	GG/AG	1.6e-08	0	1	39	0	25	0	0	0	40	25	C>T	CACCCTG	M199.1	Transcribed
CD0030d	N2	None	0	IV	6314618	C	CC/TT	1	CT/TT	1e-12	0	48	0	0	0	0	0	41	48	41	C>T	GAACGTT	Y73B6BL.7	Non-transcribed
CD0030d	N2	None	0	IV	3168886	T	TT/AA	1	AT/AA	8.5e-08	0	0	0	31	32	0	0	0	31	32	T>A	TTTTCTT	T23E1.6	Non-transcribed
CD0030d	N2	None	0	IV	11859288	A	AA/GG	1	AG/GG	3.8e-12	46	0	0	0	0	0	38	0	46	38	T>C	AGATCGC	F38H4.9	Transcribed
CD0030d	N2	None	0	III	7999454	A	AA/GG	0.97	AA/AG	0.027	46	0	0	0	0	0	5	0	46	5	T>C	TTGTATG	No_gene	No_gene
CD0030d	N2	None	0	V	17893069	T	TT/CC	1	CT/CC	1.5e-11	0	0	0	44	0	41	0	0	44	41	T>C	GGATTCT	No_gene	No_gene
CD0030d	N2	None	0	V	9356454	A	AA/CC	1	AA/AC	4.4e-05	57	0	0	0	0	14	0	0	57	14	T>G	TTTTTGT	E02C12.13	Non-transcribed
CD0031a	ced-4	None	0	II	13214194	T	TT/AA	0.79	TT/AT	0.19	0	0	0	41	2	0	0	0	41	2	T>A	CAATTTT	F15D4.1	Non-transcribed
CD0031a	ced-4	None	0	V	7805529	G	GG/AA	1	AG/AA	1.1e-10	0	0	41	0	123	0	1	0	41	124	C>T	CATCGAC	ZK742.1	Transcribed
CD0031a	ced-4	None	0	V	7805530	A	AA/TT	1	AT/TT	5.5e-11	42	0	0	0	1	0	0	123	42	124	T>A	GCATCGA	ZK742.1	Transcribed
CD0031a	ced-4	None	0	V	10672056	C	CC/TT	1	CT/TT	2.8e-11	0	43	0	0	0	0	0	88	43	88	C>T	AATCGAT	No_gene	No_gene
CD0031a	ced-4	None	0	III	13627510	A	AA/CC	1	AC/CC	1.5e-11	44	0	0	0	0	69	0	0	44	69	T>G	TTTTTAC	T12D8.4	Non-transcribed
CD0031a	ced-4	None	0	III	2758137	G	GG/TT	1	GT/TT	8e-10	0	0	38	0	0	0	0	103	38	103	C>A	GCACAAC	Y71H2AM.16	Non-transcribed
CD0031a	ced-4	None	0	X	624697	T	TT/AA	1	AT/AA	2e-12	0	0	0	47	64	0	0	0	47	64	T>A	ATTTGAG	No_gene	No_gene
CD0031d	ced-4	None	0	I	5646104	C	CC/TT	1	CT/TT	1.8e-14	0	54	0	0	0	0	0	51	54	51	C>T	GAACGAG	M01A12.1	Non-transcribed
CD0031d	ced-4	None	0	I	7677466	G	GG/CC	1	CG/CC	5.9e-09	0	0	35	0	0	78	1	0	35	79	C>G	TTTCAAT	T24B1.1	Transcribed
CD0031d	ced-4	None	0	IV	1146217	A	AA/AT	1	AT/AT	3.3e-07	29	0	0	0	12	0	0	27	29	39	T>A	AAATTCG	C50A2.3	Non-transcribed
CD0031d	ced-4	None	0	II	2682339	T	TT/GG	1	TT/GT	4.3e-11	1	0	0	43	2	0	33	0	44	35	T>G	AAATAAT	No_gene	No_gene
CD0031d	ced-4	None	0	V	16717196	C	CC/TT	0.73	CC/CT	0.17	0	50	0	0	0	0	0	2	50	2	C>T	TATCATA	No_gene	No_gene
CD0032a	N2	Mechlorethamine	0	III	2730190	A	AA/AG	1	AG/AG	0.0031	22	0	1	0	16	0	4	0	23	20	T>C	AGATGCT	Y71H2AM.7	Transcribed
CD0032a	N2	Mechlorethamine	0	IV	9700587	T	TT/AT	1	AT/AT	1.4e-13	0	0	0	51	15	0	0	19	51	34	T>A	TAATGTT	ZK1251.9	Transcribed
CD0032a	N2	Mechlorethamine	0	IV	16274863	T	TT/CC	1	TT/CT	1.2e-11	0	0	0	47	0	35	0	0	47	35	T>C	AATTATA	No_gene	No_gene
CD0032a	N2	Mechlorethamine	0	X	7118071	A	AA/TT	1	AA/AT	2.4e-11	57	0	0	0	0	0	0	34	57	34	T>A	TTTTAAG	No_gene	No_gene
CD0032a	N2	Mechlorethamine	0	X	639008	G	GG/AA	1	AG/AA	1.6e-09	0	0	37	0	29	0	0	0	37	29	C>T	TTACGCC	No_gene	No_gene
CD0032c	N2	Mechlorethamine	0	II	4926067	C	CC/CG	1	CG/CG	7e-14	0	52	0	0	0	31	34	0	52	65	C>G	GTGCAAG	No_gene	No_gene
CD0032c	N2	Mechlorethamine	0	II	2171715	T	TT/CT	1	CT/CT	1.2e-06	0	0	0	27	0	8	0	27	27	35	T>C	TTGTCGA	C33C12.6	Transcribed
CD0032c	N2	Mechlorethamine	0	III	1811589	G	GG/TT	0.69	GG/GT	0.16	0	0	49	0	0	0	0	2	49	2	C>A	TTTCCAA	Y39A3CL.5	Non-transcribed
CD0032c	N2	Mechlorethamine	0	III	3793147	C	CC/AA	0.69	CC/AC	0.16	0	35	0	0	2	0	0	0	35	2	C>A	ATTCTAA	T24A11.1	Transcribed
CD0032c	N2	Mechlorethamine	0	III	10623879	C	CC/AA	0.69	CC/AC	0.16	0	41	0	0	2	0	0	0	41	2	C>A	AATCCTT	Y39A1A.23	Non-transcribed
CD0032c	N2	Mechlorethamine	0	III	10948669	C	CC/AA	0.69	CC/AC	0.16	0	40	0	0	2	0	0	0	40	2	C>A	TTTCCAA	Y52D3.1	Non-transcribed
CD0032d	N2	Mechlorethamine	0	V	19896427	C	CC/AA	0.68	CC/AC	0.16	0	43	0	0	2	0	0	0	43	2	C>A	ACGCTAA	No_gene	No_gene
CD0033a	fan-1	Mechlorethamine	0	X	16805658	C	CC/TT	1	CT/TT	2e-12	0	47	0	0	0	0	0	84	47	84	C>T	AGACTAG	T01C8.7	Transcribed
CD0033a	fan-1	Mechlorethamine	0	I	3836845	C	CC/CT	1	CT/CT	3e-09	0	36	0	0	0	49	0	19	36	68	C>T	TTGCCGG	F53F10.1	Transcribed
CD0033a	fan-1	Mechlorethamine	0	V	4207241	A	AA/GG	0.8	AA/AG	0.19	46	0	0	0	0	0	2	0	46	2	T>C	ATATTTA	H43I07.1	Transcribed
CD0033d	fan-1	Mechlorethamine	0	I	2719930	G	GG/TT	0.68	GG/GT	0.16	0	0	50	0	0	0	0	2	50	2	C>A	ATTCGAG	Y71F9B.16	Non-transcribed
CD0034a	fcd-2	Mechlorethamine	0	II	14603740	G	GG/GT	1	GT/GT	9.2e-12	0	1	45	0	0	0	9	12	46	21	C>A	GGACATT	F19H8.1	Transcribed
CD0034a	fcd-2	Mechlorethamine	0	I	10336658	G	GG/AG	1	AG/AG	2.8e-11	0	0	43	0	8	0	20	0	43	28	C>T	GTGCTTT	ZC434.5	Transcribed
CD0034a	fcd-2	Mechlorethamine	0	I	2622387	A	AA/AC	0.99	AA/AA	0.011	17	0	0	0	14	6	0	0	17	20	T>G	CGGTGGG	Y23H5A.2	Transcribed
CD0034a	fcd-2	Mechlorethamine	0	III	8024477	T	TT/CC	1	TT/CT	3e-11	0	0	0	57	0	45	0	1	57	46	T>C	TGCTAGC	F44B9.2	Non-transcribed
CD0034a	fcd-2	Mechlorethamine	0	III	3283319	T	TT/AT	0.99	TT/TT	0.0071	1	0	0	36	4	0	0	13	37	17	T>A	ATTTAAA	Y53G8AR.7	Non-transcribed
CD0034a	fcd-2	Mechlorethamine	0	IV	9295368	A	AA/AG	1	AG/AG	7e-14	52	0	0	0	19	0	20	0	52	39	T>C	GCTTACC	F49C12.1	Non-transcribed
CD0034a	fcd-2	Mechlorethamine	0	X	4916258	G	GG/AG	1	AG/AG	3.3e-07	0	0	29	0	10	0	18	0	29	28	C>T	TTCCACG	No_gene	No_gene
CD0034a	fcd-2	Mechlorethamine	0	X	7434009	C	CC/CG	1	CG/CG	5.1e-13	0	49	0	0	0	14	18	0	49	32	C>G	AAACTAA	C01C10.4	Non-transcribed
CD0034a	fcd-2	Mechlorethamine	0	V	12386145	G	GG/AA	1	AG/AA	1.6e-09	0	0	37	0	29	0	0	0	37	29	C>T	AATCCAG	No_gene	No_gene
CD0034c	fcd-2	Mechlorethamine	0	X	7931764	T	TT/AT	1	AT/AT	5.5e-11	0	0	0	42	16	0	0	17	42	33	T>A	ATTTAAA	No_gene	No_gene
CD0034c	fcd-2	Mechlorethamine	0	X	3654348	A	AA/AT	1	AT/AT	7.5e-12	45	0	0	0	11	0	0	8	45	19	T>A	TTTTAAT	R11G1.2	Transcribed
CD0034d	fcd-2	Mechlorethamine	0	X	12025042	C	CC/CT	1	CT/CT	5.5e-11	0	42	0	0	0	20	0	8	42	28	C>T	GTCCGGA	No_gene	No_gene
CD0035a	N2	Mechlorethamine	20	X	13977315	T	TT/GG	1	GT/GG	8.6e-08	0	0	0	31	0	0	30	0	31	30	T>G	ATTTCCA	No_gene	No_gene
CD0035a	N2	Mechlorethamine	20	X	14276395	C	CC/CT	1	CT/CT	2.9e-11	0	43	0	0	0	12	0	13	43	25	C>T	TGGCCGA	E02H4.1	Non-transcribed
CD0035a	N2	Mechlorethamine	20	X	402593	G	GG/CC	1	CG/CC	1.8e-14	0	0	54	0	0	50	0	0	54	50	C>G	TCGCGCT	No_gene	No_gene
CD0035a	N2	Mechlorethamine	20	X	7454859	T	TT/AA	1	TT/AT	1.8e-09	0	0	0	53	28	0	0	0	53	28	T>A	AAATATA	No_gene	No_gene
CD0035a	N2	Mechlorethamine	20	X	3995780	C	CC/AA	1	AC/AA	1e-12	0	48	0	0	40	0	0	0	48	40	C>A	TCACTCT	No_gene	No_gene
CD0035a	N2	Mechlorethamine	20	X	4302325	G	GG/AA	1	GG/AG	2.8e-07	0	0	39	0	21	0	0	0	39	21	C>T	GGACGAA	C52B9.8	Non-transcribed
CD0035a	N2	Mechlorethamine	20	X	15282689	C	CC/AA	1	CC/AC	3.8e-09	0	45	0	0	27	0	0	0	45	27	C>A	ACACTTT	No_gene	No_gene
CD0035a	N2	Mechlorethamine	20	I	598486	A	AA/CC	1	AA/AC	2.4e-06	33	0	0	0	0	18	0	0	33	18	T>G	CTATGCT	F56A6.2	Non-transcribed
CD0035a	N2	Mechlorethamine	20	I	15040933	G	GG/AG	1	AG/AG	2.4e-06	0	0	26	0	15	0	18	0	26	33	C>T	ACCCGTG	F31C3.1	Non-transcribed
CD0035a	N2	Mechlorethamine	20	I	3148461	A	AA/AT	1	AT/AT	8.9e-08	31	0	0	0	16	2	0	14	31	32	T>A	ATGTGGC	K09H9.2	Transcribed
CD0035a	N2	Mechlorethamine	20	III	13011679	A	AA/AC	1	AC/AC	2.1e-10	40	0	0	0	19	19	0	0	40	38	T>G	ATCTGCA	No_gene	No_gene
CD0035a	N2	Mechlorethamine	20	III	12073286	A	AA/AC	1	AA/AA	0.0049	27	0	0	0	16	4	0	0	27	20	T>G	TTTTTAG	No_gene	No_gene
CD0035a	N2	Mechlorethamine	20	III	755141	T	TT/CT	1	CT/CT	5.5e-11	0	0	0	42	0	25	0	18	42	43	T>C	TCGTCTG	No_gene	No_gene
CD0035a	N2	Mechlorethamine	20	II	5088305	G	GG/CC	1	CG/CC	4.1e-10	0	0	39	0	0	38	0	0	39	38	C>G	CGTCGAG	C04G6.3	Non-transcribed
CD0035a	N2	Mechlorethamine	20	II	3776539	G	GG/AG	1	AG/AG	5.9e-09	0	0	35	0	21	0	23	0	35	44	C>T	GAACTTT	T24E12.3	Transcribed
CD0035a	N2	Mechlorethamine	20	IV	2305049	C	CC/CG	1	CG/CG	1.1e-10	0	41	0	0	0	21	9	0	41	30	C>G	TATCAAC	Y38F2AL.2	Transcribed
CD0035a	N2	Mechlorethamine	20	IV	2305051	A	AA/AT	1	AT/AT	1.1e-10	41	0	0	0	21	0	0	9	41	30	T>A	TTGTTGA	Y38F2AL.2	Non-transcribed
CD0035a	N2	Mechlorethamine	20	IV	2305197	T	TT/AT	1	AT/AT	5.9e-09	0	0	0	35	5	0	0	15	35	20	T>A	AAATTGT	Y38F2AL.2	Transcribed
CD0035a	N2	Mechlorethamine	20	V	927617	C	CC/GG	1	CC/CG	3.1e-11	0	47	0	0	0	0	33	1	47	34	C>G	TATCCTT	No_gene	No_gene
CD0035a	N2	Mechlorethamine	20	V	17206024	G	GG/CG	1	CG/CG	3e-09	0	0	36	0	0	18	27	0	36	45	C>G	ATCCAAA	Y68A4A.11	Transcribed
CD0035c	N2	Mechlorethamine	20	IV	14897025	A	AA/AT	1	AT/AT	2.6e-15	57	0	0	0	28	0	0	17	57	45	T>A	AGTTAAA	Y57G11C.24	Transcribed
CD0035c	N2	Mechlorethamine	20	X	115536	G	GG/AG	1	AG/AG	1.8e-05	0	0	23	0	6	0	24	0	23	30	C>T	AGGCCCA	Y73B3A.15	Transcribed
CD0035c	N2	Mechlorethamine	20	V	14497349	T	TT/CT	1	CT/CT	7.5e-12	0	0	0	45	0	26	0	15	45	41	T>C	AAATAAC	No_gene	No_gene
CD0035c	N2	Mechlorethamine	20	V	3518740	T	TT/GG	1	TT/GT	2.4e-11	0	0	0	46	0	0	34	0	46	34	T>G	AATTTTC	C07G3.3	Non-transcribed
CD0035d	N2	Mechlorethamine	20	II	2727139	A	AA/AT	1	AT/AT	3e-09	36	0	0	0	16	0	0	9	36	25	T>A	AACTTTT	No_gene	No_gene
CD0035d	N2	Mechlorethamine	20	II	10022910	G	GG/AA	1	AG/AA	5.9e-09	0	0	35	0	28	0	0	0	35	28	C>T	GGGCCGC	No_gene	No_gene
CD0035d	N2	Mechlorethamine	20	I	11266767	G	GG/AG	1	AG/AG	4.5e-08	0	0	32	0	8	0	7	0	32	15	C>T	ACCCCTA	No_gene	No_gene
CD0035d	N2	Mechlorethamine	20	I	11266784	T	TT/CT	1	TT/TT	3.3e-05	0	0	0	40	0	4	0	15	40	19	T>C	TACTGTA	No_gene	No_gene
CD0035d	N2	Mechlorethamine	20	III	11150962	C	CC/CT	0.98	CT/CT	0.016	0	25	0	1	0	16	0	4	26	20	C>T	ATGCAAT	Y47D3A.29	Non-transcribed
CD0035d	N2	Mechlorethamine	20	III	12844496	C	CC/CT	1	CC/CC	0.00051	0	45	0	0	0	16	0	4	45	20	C>T	TTTCAGT	No_gene	No_gene
CD0035d	N2	Mechlorethamine	20	V	17274034	A	AA/AG	1	AG/AG	4.4e-08	32	0	0	0	35	0	12	0	32	47	T>C	TTTTGAA	K10G4.10	Transcribed
CD0035d	N2	Mechlorethamine	20	IV	11754019	A	AA/AT	1	AT/AT	1e-12	48	0	0	0	15	0	0	15	48	30	T>A	AACTACA	T12A7.3	Non-transcribed
CD0035d	N2	Mechlorethamine	20	X	5971909	G	GG/CC	1	GG/CG	3.7e-09	0	0	39	0	0	27	0	0	39	27	C>G	AACCGCA	R07E4.6	Non-transcribed
CD0036a	fan-1	Mechlorethamine	20	V	9043882	T	TT/CT	1	CT/CT	5.6e-11	0	0	0	42	0	12	0	13	42	25	T>C	GTTTTCT	No_gene	No_gene
CD0036a	fan-1	Mechlorethamine	20	V	16294843	G	GG/CC	1	GG/CG	8.9e-10	0	0	46	0	0	29	0	0	46	29	C>G	CCACAAG	C31A11.1	Transcribed
CD0036a	fan-1	Mechlorethamine	20	V	10817217	T	TT/CT	1	CT/CT	5.5e-11	0	0	0	42	0	7	0	16	42	23	T>C	ATTTTGT	No_gene	No_gene
CD0036a	fan-1	Mechlorethamine	20	II	7302536	G	GG/AG	1	AG/AG	3.1e-09	0	0	36	0	17	0	27	0	36	44	C>T	TATCAAT	F45E12.3	Transcribed
CD0036a	fan-1	Mechlorethamine	20	IV	3824622	G	GG/GT	1	GG/GG	0.0018	0	0	39	0	0	0	14	4	39	18	C>A	AAACAAA	No_gene	No_gene
CD0036a	fan-1	Mechlorethamine	20	IV	5121509	C	CC/CT	1	CT/CT	1e-12	0	48	0	0	0	20	0	10	48	30	C>T	GGTCAAA	AC7.1	Transcribed
CD0036c	fan-1	Mechlorethamine	20	II	13533221	G	GG/TT	0.67	GG/GG	0.17	0	0	34	0	0	0	0	2	34	2	C>A	TTTCAAA	No_gene	No_gene
CD0036c	fan-1	Mechlorethamine	20	IV	6550130	C	CC/AA	0.95	CC/AC	0.054	0	41	0	0	4	0	0	0	41	4	C>A	TGACGAA	C01G5.8	Non-transcribed
CD0036c	fan-1	Mechlorethamine	20	IV	12495442	T	TT/CT	1	CT/CT	1.4e-13	0	0	0	51	0	15	0	15	51	30	T>C	ATATGAT	No_gene	No_gene
CD0036c	fan-1	Mechlorethamine	20	IV	14833392	C	CC/TT	1	CC/CT	1.4e-07	0	45	0	0	0	0	0	22	45	22	C>T	CTTCCGT	Y57G11C.341	Non-transcribed
CD0036c	fan-1	Mechlorethamine	20	IV	2968689	C	CC/AC	1	AC/AC	8.8e-08	0	31	0	0	52	45	0	2	31	99	C>A	TGCCTGC	Y54G2A.25	Transcribed
CD0036c	fan-1	Mechlorethamine	20	I	2167451	A	AA/TT	0.79	AA/AT	0.19	53	0	0	0	0	0	0	2	53	2	T>A	TTTTTTT	W03F11.6	Transcribed
CD0036c	fan-1	Mechlorethamine	20	X	5026068	C	CC/TT	1	CT/TT	3.6e-14	0	53	0	0	0	0	0	77	53	77	C>T	CAGCCGC	ZC449.1	Non-transcribed
CD0036c	fan-1	Mechlorethamine	20	X	9199776	A	AA/AT	1	AT/AT	7e-14	52	0	0	0	54	0	0	45	52	99	T>A	TTGTGGG	No_gene	No_gene
CD0036c	fan-1	Mechlorethamine	20	X	12545906	T	TT/CT	1	CT/CT	2.5e-15	0	0	0	57	0	23	0	39	57	62	T>C	TGTTTCT	C16D6.2	Transcribed
CD0036d	fan-1	Mechlorethamine	20	V	5215542	A	AA/AG	1	AG/AG	2.1e-10	40	0	0	0	17	0	9	0	40	26	T>C	ATTTGCC	No_gene	No_gene
CD0036d	fan-1	Mechlorethamine	20	V	9422608	A	AA/AT	1	AT/AT	2.9e-11	43	0	0	0	38	0	0	38	43	76	T>A	AGCTTTT	F36D4.5	Non-transcribed
CD0036d	fan-1	Mechlorethamine	20	III	12636672	G	GG/GT	1	GT/GT	2.2e-08	0	0	33	0	0	0	20	7	33	27	C>A	GCACTTT	Y111B2A.14	Transcribed
CD0037a	fcd-2	Mechlorethamine	20	V	12259558	A	AA/AT	1	AT/AT	2.8e-11	43	0	0	0	16	0	0	16	43	32	T>A	AATTTGT	T04H1.8	Transcribed
CD0037a	fcd-2	Mechlorethamine	20	I	14431451	C	CC/CT	1	CT/CT	1e-12	0	48	0	0	0	10	0	11	48	21	C>T	GGGCAAT	Y105E8A.10	Non-transcribed
CD0037c	fcd-2	Mechlorethamine	20	II	2269828	G	GG/CG	0.96	GG/GG	0.036	0	0	30	0	0	7	21	0	30	28	C>G	TAGCGGG	No_gene	No_gene
CD0037c	fcd-2	Mechlorethamine	20	X	17209461	A	AA/AT	1	AT/AT	2.6e-13	50	0	0	0	23	0	0	8	50	31	T>A	TTTTAAT	No_gene	No_gene
CD0037c	fcd-2	Mechlorethamine	20	V	11229508	A	AA/AT	1	AT/AT	2e-12	47	0	0	0	14	0	0	21	47	35	T>A	TATTTTT	No_gene	No_gene
CD0037d	fcd-2	Mechlorethamine	20	I	9713154	A	AA/AG	1	AG/AG	2e-12	47	0	0	0	16	0	13	0	47	29	T>C	TGTTCCA	C16C2.4	Non-transcribed
CD0037d	fcd-2	Mechlorethamine	20	V	15246880	G	GG/TT	1	GG/GT	1e-10	0	0	50	0	0	0	0	32	50	32	C>A	TTGCAAT	M01B2.1	Transcribed
CD0037d	fcd-2	Mechlorethamine	20	III	13495426	C	CC/AC	1	AC/AC	1e-12	0	48	0	0	10	17	0	0	48	27	C>A	CACCTCA	T28A8.2	Transcribed
CD0037d	fcd-2	Mechlorethamine	20	III	10388890	T	TT/AT	1	TT/TT	0.0027	1	0	0	49	4	0	0	15	50	19	T>A	CAATAAT	M03C11.9	Transcribed
CD0037d	fcd-2	Mechlorethamine	20	III	1289344	T	TT/CT	1	CT/CT	1e-12	0	0	0	48	0	8	0	12	48	20	T>C	GGATGTG	No_gene	No_gene
CD0037d	fcd-2	Mechlorethamine	20	X	10451831	C	CC/AC	1	AC/AC	3.3e-16	0	60	0	0	13	11	0	0	60	24	C>A	TCTCTTC	No_gene	No_gene
CD0037d	fcd-2	Mechlorethamine	20	IV	9167543	T	TT/CT	1	CT/CT	3.6e-14	0	0	0	53	0	11	0	13	53	24	T>C	TATTTTG	No_gene	No_gene
CD0037d	fcd-2	Mechlorethamine	20	IV	675931	C	CC/CT	1	CT/CT	2e-12	0	47	0	0	0	8	0	9	47	17	C>T	GGACTGA	No_gene	No_gene
CD0037d	fcd-2	Mechlorethamine	20	IV	3407937	A	AA/AG	1	AG/AG	8e-10	38	0	0	0	9	0	10	0	38	19	T>C	GTTTAAT	No_gene	No_gene
CD0039c	fan-1	Cisplatin	0	V	19702906	C	CC/AA	1	AC/AA	6.3e-07	0	28	0	0	84	0	0	0	28	84	C>A	ACGCCAC	Y43F8C.14	Non-transcribed
CD0039d	fan-1	Cisplatin	0	II	12685799	A	AA/GG	0.81	AA/AG	0.19	45	0	0	0	0	0	2	0	45	2	T>C	ACCTAAA	Y46G5A.2	Transcribed
CD0039d	fan-1	Cisplatin	0	X	8007054	T	TT/AA	1	AT/AA	5.2e-13	0	0	0	49	56	0	0	0	49	56	T>A	TTTTAAA	No_gene	No_gene
CD0040a	fcd-2	Cisplatin	0	X	15001380	G	GG/TT	1	GT/TT	1.5e-11	0	0	44	0	0	0	0	39	44	39	C>A	GGACAAG	No_gene	No_gene
CD0040a	fcd-2	Cisplatin	0	V	1211495	C	CC/TT	0.79	CC/CT	0.19	0	30	0	0	0	0	0	2	30	2	C>T	AAACAAT	Y50D4A.1	Non-transcribed
CD0040a	fcd-2	Cisplatin	0	IV	478786	T	TT/AA	0.9	TT/AT	0.1	0	0	0	53	3	0	0	0	53	3	T>A	TTTTAAA	M04G7.3	Transcribed
CD0040c	fcd-2	Cisplatin	0	IV	15284886	A	AA/GG	1	AA/AG	4.3e-15	71	0	0	0	0	0	46	0	71	46	T>C	TAGTGTA	Y73F8A.631	Non-transcribed
CD0040d	fcd-2	Cisplatin	0	V	3138034	T	TT/AT	1	AT/AT	3e-09	0	0	0	36	22	0	0	19	36	41	T>A	ATTTAAA	F02C9.4	Transcribed
CD0040d	fcd-2	Cisplatin	0	IV	15080561	A	AA/TT	0.67	AA/AT	0.16	9	0	0	0	0	0	0	2	9	2	T>A	CAATTTT	No_gene	No_gene
CD0040d	fcd-2	Cisplatin	0	X	2057425	C	CC/AC	1	AC/AC	5.2e-13	0	49	0	0	13	9	0	0	49	22	C>A	AAACATT	No_gene	No_gene
CD0041a	lig-4; fcd-2	Cisplatin	0	II	13417460	TRUE	TT/AT	1	AT/AT	3.8e-12	0	0	0	46	18	0	0	16	46	34	T>A	CTATCGA	Y48E1C.1	Non-transcribed
CD0041a	lig-4; fcd-2	Cisplatin	0	IV	17456653	TRUE	TT/GT	1	GT/GT	3.1e-09	0	0	0	36	0	0	9	16	36	25	T>G	CCGTAAA	No_gene	No_gene
CD0041c	lig-4; fcd-2	Cisplatin	0	V	16241407	A	AA/AC	1	AC/AC	3.3e-07	29	0	0	0	9	10	0	0	29	19	T>G	AAGTTTA	F21H7.13	Non-transcribed
CD0041d	lig-4; fcd-2	Cisplatin	0	III	13129437	G	GG/AG	1	GG/GG	5.6e-13	0	0	50	0	6	0	10	0	50	16	C>T	ATACAAC	Y39E4B.8	Transcribed
CD0042a	lig-4	Cisplatin	0	III	3081530	A	AA/AG	1	AG/AG	7.5e-12	45	0	0	0	34	0	26	0	45	60	T>C	TTGTAAC	H06I04.3	Transcribed
CD0042a	lig-4	Cisplatin	0	III	6829426	G	GG/AG	1	AG/AG	1.6e-09	0	0	37	0	38	0	23	0	37	61	C>T	TTACGTC	R13F6.4	Transcribed
CD0042a	lig-4	Cisplatin	0	III	2304795	C	CC/CT	1	CT/CT	4.2e-10	0	39	0	0	0	35	0	30	39	65	C>T	GGCCCAA	Y54F10BM.9	Transcribed
CD0042a	lig-4	Cisplatin	0	I	8648958	C	CC/CT	1	CT/CT	9.1e-06	0	24	0	0	0	11	0	7	24	18	C>T	GACCATT	F39H2.2	Non-transcribed
CD0042a	lig-4	Cisplatin	0	IV	7294939	A	AA/CC	1	AA/AC	5e-11	64	0	0	0	0	33	0	0	64	33	T>G	TCATTAG	No_gene	No_gene
CD0042a	lig-4	Cisplatin	0	IV	2795522	G	GG/AA	0.74	GG/AG	0.18	0	0	26	0	2	0	0	0	26	2	C>T	GCCCCGC	Y54G2A.2	Transcribed
CD0042a	lig-4	Cisplatin	0	IV	5336896	C	CC/AC	1	AC/AC	8.2e-19	0	69	0	0	11	21	0	0	69	32	C>A	TCTCGGT	No_gene	No_gene
CD0042a	lig-4	Cisplatin	0	X	15721730	C	CC/AC	1	AC/AC	7.6e-12	0	45	0	0	41	36	0	0	45	77	C>A	AAACAAG	ZK662.5	Non-transcribed
CD0042c	lig-4	Cisplatin	0	I	1040096	T	TT/AT	1	AT/AT	5.2e-13	0	0	0	49	20	0	0	20	49	40	T>A	TTTTAAA	Y34D9A.3	Non-transcribed
CD0042c	lig-4	Cisplatin	0	V	300986	C	CC/AA	0.69	CC/AC	0.16	0	34	0	0	2	0	0	0	34	2	C>A	ATTCAAA	F33E11.3	Transcribed
CD0042c	lig-4	Cisplatin	0	X	1304679	T	TT/AA	1	AT/AA	1.2e-08	0	0	0	34	47	0	0	0	34	47	T>A	TTTTAAA	C52B11.2	Non-transcribed
CD0042d	lig-4	Cisplatin	0	IV	9332360	C	CC/AA	1	AC/AA	1.5e-11	0	44	0	0	89	0	0	0	44	89	C>A	TTCCCAC	No_gene	No_gene
CD0042d	lig-4	Cisplatin	0	IV	4414233	G	GG/TT	0.72	GG/GT	0.17	0	0	48	0	0	0	0	2	48	2	C>A	TTTCCAA	Y24D9A.1	Transcribed
CD0042d	lig-4	Cisplatin	0	X	112885	A	AA/AT	1	AT/AT	1.6e-09	37	0	0	0	28	0	0	7	37	35	T>A	TACTCTC	No_gene	No_gene
CD0042d	lig-4	Cisplatin	0	II	8482811	T	TT/AA	1	AT/AA	2.9e-11	0	0	0	43	62	0	0	0	43	62	T>A	TTTTAAG	M05D6.6	Transcribed
CD0043a	mus-81	Cisplatin	0	IV	1217307	C	CC/CG	1	CG/CG	1.4e-11	0	44	0	0	0	37	29	0	44	66	C>G	AGTCTTA	W09G12.9	Non-transcribed
CD0043a	mus-81	Cisplatin	0	V	13540179	T	TT/CT	1	CT/CT	1e-12	0	0	0	48	0	31	0	22	48	53	T>C	ATCTTTG	No_gene	No_gene
CD0043a	mus-81	Cisplatin	0	X	16878828	T	TT/CT	1	CT/CT	4.2e-10	0	0	0	39	0	24	0	29	39	53	T>C	CAGTTGG	T20F7.7	Transcribed
CD0043c	mus-81	Cisplatin	0	IV	6925994	T	TT/AT	1	AT/AT	8.1e-10	0	0	0	38	15	0	0	26	38	41	T>A	TATTTGC	No_gene	No_gene
CD0043c	mus-81	Cisplatin	0	I	3310322	T	TT/CC	1	CT/CC	3e-09	0	0	0	36	0	49	0	0	36	49	T>C	AAATGTT	No_gene	No_gene
CD0043c	mus-81	Cisplatin	0	II	2391543	G	GG/AG	1	AG/AG	1.9e-14	0	0	54	0	13	0	49	0	54	62	C>T	GTCCCAG	No_gene	No_gene
CD0043c	mus-81	Cisplatin	0	II	11145870	C	CC/AA	1	AC/AA	2.1e-10	0	40	0	0	55	0	0	0	40	55	C>A	CAGCATA	F40F8.8	Non-transcribed
CD0043c	mus-81	Cisplatin	0	X	15674489	C	CC/TT	0.75	CC/CT	0.18	0	42	0	0	0	0	0	2	42	2	C>T	GGACCAG	F59D12.2	Transcribed
CD0043c	mus-81	Cisplatin	0	X	1838834	G	GG/AG	1	GG/GG	1.4e-05	0	0	38	0	5	0	19	0	38	24	C>T	GTTCAGA	T26C11.3	Non-transcribed
CD0043c	mus-81	Cisplatin	0	V	4096011	C	CC/TT	1	CC/CT	1.8e-09	0	47	0	0	0	0	0	28	47	28	C>T	TTCCAAC	F38H12.3	Non-transcribed
CD0043d	mus-81	Cisplatin	0	III	5877159	G	GG/GT	1	GT/GT	7.4e-12	0	0	45	0	0	0	52	77	45	129	C>A	TTGCAAT	F01F1.13	Non-transcribed
CD0043d	mus-81	Cisplatin	0	X	660703	C	CC/CT	1	CT/CT	1.4e-13	0	51	0	0	1	61	0	45	51	107	C>T	GTCCCTT	T19D7.4	Transcribed
CD0043d	mus-81	Cisplatin	0	IV	4420727	T	TT/AT	1	AT/AT	8e-10	0	0	0	38	22	0	0	87	38	109	T>A	ATCTAAT	No_gene	No_gene
CD0043d	mus-81	Cisplatin	0	IV	4420729	A	AA/AC	1	AC/AC	8e-10	38	0	0	0	87	26	0	0	38	113	T>G	CCATTAG	No_gene	No_gene
CD0043d	mus-81	Cisplatin	0	IV	4420744	A	AA/AG	1	AG/AG	1.5e-11	44	0	0	0	95	0	33	0	44	128	T>C	ATTTCCA	No_gene	No_gene
CD0044c	polq-1	Cisplatin	0	II	13318625	G	GG/AG	1	AG/AG	0.00013	0	0	20	0	17	0	19	1	20	37	C>T	GCCCTAA	Y48C3A.7	Non-transcribed
CD0044c	polq-1	Cisplatin	0	V	19495378	T	TT/GT	0.85	TT/TT	0.15	0	0	0	16	0	0	4	15	16	19	T>G	GGGTGGG	Y43F8B.5	Transcribed
CD0044d	polq-1	Cisplatin	0	III	8979657	T	TT/CC	1	CT/CC	3.8e-12	0	0	0	46	0	44	0	0	46	44	T>C	CCTTTCT	R08D7.6	Transcribed
CD0044d	polq-1	Cisplatin	0	III	69350	C	CC/AA	1	AC/AA	4.4e-08	0	32	0	0	39	0	0	0	32	39	C>A	TCACTTT	F54C4.2	Transcribed
CD0044d	polq-1	Cisplatin	0	I	7096327	A	AA/TT	1	AT/TT	9.4e-15	55	0	0	0	1	0	0	78	55	79	T>A	ATCTGCT	F22D6.6	Transcribed
CD0044d	polq-1	Cisplatin	0	I	7719106	G	GG/GT	0.87	GG/GG	0.13	0	0	21	0	0	0	11	4	21	15	C>A	GTTCACC	No_gene	No_gene
CD0044d	polq-1	Cisplatin	0	V	19145641	A	AA/GG	0.8	AA/AG	0.19	42	0	0	0	0	0	2	0	42	2	T>C	TTATTAA	No_gene	No_gene
CD0044d	polq-1	Cisplatin	0	V	4292089	C	CC/TT	1	CT/TT	1e-12	0	48	0	0	0	0	0	66	48	66	C>T	CAACGGA	F47D2.10	Transcribed
CD0044d	polq-1	Cisplatin	0	V	1751969	C	CC/TT	0.8	CC/CT	0.19	0	45	0	0	0	0	0	2	45	2	C>T	TTCCATA	No_gene	No_gene
CD0044d	polq-1	Cisplatin	0	II	5435019	G	GG/AA	1	GG/AG	3.3e-09	0	0	41	0	39	0	1	0	41	40	C>T	GTACCTC	No_gene	No_gene
CD0045a	slx-1	Cisplatin	0	X	2652807	A	AA/AC	1	AA/AA	1.4e-07	35	1	0	0	25	10	0	0	36	35	T>G	GGGTGAG	F54G2.1	Non-transcribed
CD0045a	slx-1	Cisplatin	0	X	4035223	C	CC/CT	1	CC/CC	0.00021	0	21	0	0	0	16	0	4	21	20	C>T	TATCGTT	No_gene	No_gene
CD0045a	slx-1	Cisplatin	0	X	15078263	C	CC/CG	1	CG/CG	1.7e-07	0	30	0	0	0	37	26	0	30	63	C>G	TTTCATT	No_gene	No_gene
CD0045a	slx-1	Cisplatin	0	X	13310782	A	AA/TT	1	AT/TT	3.8e-12	46	0	0	0	0	0	0	60	46	60	T>A	ACCTAAT	F46G10.1	Non-transcribed
CD0045a	slx-1	Cisplatin	0	II	13400833	T	TT/AA	0.79	TT/AT	0.19	0	0	0	34	2	0	0	0	34	2	T>A	CCATTCT	Y48C3A.14	Non-transcribed
CD0045a	slx-1	Cisplatin	0	V	17391616	C	CC/CT	0.93	CC/CC	0.071	0	42	0	1	0	12	0	3	43	15	C>T	AACCGAG	No_gene	No_gene
CD0045c	slx-1	Cisplatin	0	IV	3792116	A	AA/AC	1	AC/AC	2.3e-10	40	0	0	1	26	34	0	0	41	60	T>G	TTTTGAG	W07G9.2	Transcribed
CD0045c	slx-1	Cisplatin	0	III	10415941	C	CC/AC	0.94	CC/CC	0.065	0	39	0	0	4	11	0	0	39	15	C>A	AGTCACT	No_gene	No_gene
CD0045d	slx-1	Cisplatin	0	V	18983688	C	CC/CT	1	CT/CT	1.8e-14	0	54	0	0	0	22	0	20	54	42	C>T	TTCCGCG	Y39B6A.39	Non-transcribed
CD0046a	xpf-1	Cisplatin	0	I	7209945	G	GG/AG	1	AG/AG	8e-10	0	0	38	0	59	0	52	0	38	111	C>T	TTTCTTC	No_gene	No_gene
CD0046a	xpf-1	Cisplatin	0	II	7527575	G	GG/AG	1	AG/AG	1.8e-14	0	0	54	0	46	0	54	0	54	100	C>T	CTTCTAT	ZK1290.6	Transcribed
CD0046a	xpf-1	Cisplatin	0	II	5808539	G	GG/AG	1	AG/AG	2e-12	0	0	47	0	49	0	45	0	47	94	C>T	AATCTAG	No_gene	No_gene
CD0046a	xpf-1	Cisplatin	0	III	2997669	C	CC/TT	0.72	CC/CT	0.17	0	32	0	0	0	0	0	2	32	2	C>T	TTTCGAA	Y55D5A.5	Transcribed
CD0046a	xpf-1	Cisplatin	0	X	16486956	G	GG/AG	1	AG/AG	1.1e-10	0	0	41	0	50	0	30	0	41	80	C>T	CTTCGTC	No_gene	No_gene
CD0046a	xpf-1	Cisplatin	0	IV	17115762	G	GG/AA	1	AG/AA	2.7e-13	0	0	50	0	105	0	0	0	50	105	C>T	AAACTGC	Y116A8C.34	Non-transcribed
CD0046a	xpf-1	Cisplatin	0	V	202569	G	GG/AG	1	AG/AG	4.8e-15	0	0	56	0	35	0	32	0	56	67	C>T	ATTCGAG	DC2.8	Transcribed
CD0046c	xpf-1	Cisplatin	0	I	268602	C	CC/AC	1	AC/AC	2e-12	0	47	0	0	33	31	0	0	47	64	C>A	GTTCAAA	No_gene	No_gene
CD0046c	xpf-1	Cisplatin	0	IV	4880840	C	CC/AC	1	AC/AC	2.4e-06	0	26	0	0	57	51	0	0	26	108	C>A	ACCCATA	T08B6.64	Transcribed
CD0046c	xpf-1	Cisplatin	0	V	2913942	C	CC/AC	1	AC/AC	4e-12	0	46	0	0	95	70	0	1	46	166	C>A	TCACCTG	No_gene	No_gene
CD0046d	xpf-1	Cisplatin	0	III	2561431	C	CC/TT	1	CT/TT	8e-10	0	38	0	0	0	0	0	63	38	63	C>T	TTTCCAT	No_gene	No_gene
CD0046d	xpf-1	Cisplatin	0	III	2636731	G	GG/AA	1	AG/AA	8.6e-08	0	0	31	0	102	0	0	0	31	102	C>T	CTTCGTC	H19M22.3	Transcribed
CD0046d	xpf-1	Cisplatin	0	III	12898121	C	CC/CT	1	CT/CT	3.9e-12	0	46	0	0	0	46	0	37	46	83	C>T	CGTCCAT	No_gene	No_gene
CD0046d	xpf-1	Cisplatin	0	II	14854411	C	CC/CT	1	CT/CT	2.3e-08	0	33	0	0	0	47	0	32	33	79	C>T	TCTCCAA	No_gene	No_gene
CD0046d	xpf-1	Cisplatin	0	II	551665	C	CC/AC	1	AC/AC	1.4e-11	0	44	0	0	68	51	0	0	44	119	C>A	CCCCACA	C09E8.3	Non-transcribed
CD0046d	xpf-1	Cisplatin	0	X	6125660	C	CC/CT	1	CT/CT	9.4e-15	0	55	0	0	0	58	0	60	55	118	C>T	TCACAGA	C15H9.1	Non-transcribed
CD0046d	xpf-1	Cisplatin	0	X	11971520	A	AA/AG	1	AG/AG	3.8e-12	46	0	0	0	50	0	45	0	46	95	T>C	AATTATT	C49F5.2	Non-transcribed
CD0046d	xpf-1	Cisplatin	0	V	7793550	T	TT/GT	1	GT/GT	1.5e-11	0	0	0	44	0	0	73	80	44	153	T>G	CGATCAT	C26F1.10	Non-transcribed
CD0046d	xpf-1	Cisplatin	0	V	11643019	G	GG/TT	1	GT/TT	2.1e-10	0	0	40	0	0	0	0	63	40	63	C>A	TGTCTAA	No_gene	No_gene
CD0046d	xpf-1	Cisplatin	0	V	19563383	C	CC/CT	1	CT/CT	5.5e-11	0	42	0	0	0	58	0	48	42	106	C>T	TTTCCTA	No_gene	No_gene
CD0046d	xpf-1	Cisplatin	0	V	4147612	T	TT/AT	1	AT/AT	5.2e-13	0	0	0	49	31	0	0	43	49	74	T>A	AGTTTAT	Y45G5AM.6	Transcribed
CD0046d	xpf-1	Cisplatin	0	I	11872978	C	CC/AC	1	AC/AC	4.4e-08	0	32	0	0	41	39	0	0	32	80	C>A	AGCCTCG	No_gene	No_gene
CD0046d	xpf-1	Cisplatin	0	IV	16786005	T	TT/GG	1	GT/GG	8.7e-17	0	0	0	62	0	0	85	0	62	85	T>G	TATTTTA	No_gene	No_gene
CD0047c	N2	Cisplatin	10	III	4226835	T	TT/GG	1	GT/GG	9.9e-15	0	0	0	55	0	0	79	0	55	79	T>G	ATGTCTT	F43C1.2	Transcribed
CD0047c	N2	Cisplatin	10	I	4409552	C	CC/CT	1	CT/CT	2.1e-10	0	40	0	0	0	14	0	19	40	33	C>T	AATCCCT	No_gene	No_gene
CD0047c	N2	Cisplatin	10	IV	5612173	G	GG/GT	1	GT/GT	1.5e-11	0	0	44	0	0	0	64	33	44	97	C>A	ACGCTGA	C39H7.4	Non-transcribed
CD0047d	N2	Cisplatin	10	X	15643083	T	TT/CT	1	CT/CT	5.2e-13	0	0	0	49	0	37	0	25	49	62	T>C	AAATATG	H08J19.1	Non-transcribed
CD0047d	N2	Cisplatin	10	X	408083	G	GG/CG	1	CG/CG	1.6e-09	0	0	37	0	0	42	40	0	37	82	C>G	GCACTGC	ZK1193.2	Non-transcribed
CD0047d	N2	Cisplatin	10	IV	2151841	T	TT/AA	0.97	TT/AT	0.027	0	0	0	44	5	0	0	0	44	5	T>A	TATTTTT	C54E4.3	Transcribed
CD0047d	N2	Cisplatin	10	IV	998338	G	GG/TT	0.67	GG/GG	0.17	0	0	56	0	0	0	0	2	56	2	C>A	AATCAAG	No_gene	No_gene
CD0047d	N2	Cisplatin	10	I	1413570	C	CC/AC	1	AC/AC	2.1e-10	0	40	0	0	30	42	0	0	40	72	C>A	ACCCCGA	No_gene	No_gene
CD0047d	N2	Cisplatin	10	V	19110039	A	AA/TT	0.76	AA/AT	0.18	31	0	0	0	0	0	0	2	31	2	T>A	AAATTAA	Y39B6A.14	Non-transcribed
CD0047d	N2	Cisplatin	10	V	19110048	A	AA/TT	0.8	AA/AT	0.19	31	0	0	0	0	0	0	2	31	2	T>A	ACATATT	Y39B6A.14	Non-transcribed
CD0048a	fan-1	Cisplatin	10	IV	3192483	G	GG/TT	0.74	GG/GT	0.17	0	0	43	0	0	0	0	2	43	2	C>A	TGGCGGC	No_gene	No_gene
CD0048a	fan-1	Cisplatin	10	IV	4710071	A	AA/AT	1	AT/AT	7.4e-12	45	0	0	0	10	0	0	11	45	21	T>A	TTTTAAA	K08F11.3	Non-transcribed
CD0048a	fan-1	Cisplatin	10	I	5574187	T	TT/GT	1	GT/GT	2e-12	0	0	0	47	0	0	56	17	47	73	T>G	TTTTTAG	M01E11.3	Non-transcribed
CD0048a	fan-1	Cisplatin	10	I	9925946	C	CC/CT	1	CT/CT	2.7e-13	0	50	0	0	0	8	0	37	50	45	C>T	ATTCTTT	No_gene	No_gene
CD0048a	fan-1	Cisplatin	10	I	857067	C	CC/AA	0.73	CC/AC	0.17	0	41	0	0	2	0	0	0	41	2	C>A	AGGCAAA	Y95B8A.8	Non-transcribed
CD0048c	fan-1	Cisplatin	10	V	19747463	A	AA/AT	1	AT/AT	1.8e-14	54	0	0	0	36	0	0	15	54	51	T>A	GCTTAGG	W04E12.5	Transcribed
CD0048c	fan-1	Cisplatin	10	III	7353094	C	CC/CT	1	CC/CC	1.7e-05	0	60	0	1	0	19	0	5	61	24	C>T	TTTCTAT	F08F8.9	Transcribed
CD0048d	fan-1	Cisplatin	10	X	1372282	G	GG/GT	1	GT/GT	2.1e-10	0	0	40	0	0	0	38	25	40	63	C>A	TGGCCCC	F56C3.2	Transcribed
CD0048d	fan-1	Cisplatin	10	I	4498629	A	AA/TT	0.7	AA/AT	0.17	46	0	0	0	0	0	0	2	46	2	T>A	TTTTAAA	T01A4.1	Transcribed
CD0048d	fan-1	Cisplatin	10	V	18888115	C	CC/AC	1	AC/AC	2.4e-06	0	26	0	0	9	16	0	1	26	26	C>A	CTCCCTG	Y80D3A.2	Transcribed
CD0048d	fan-1	Cisplatin	10	V	19505625	C	CC/AC	1	AC/AC	6.9e-05	0	21	0	0	10	17	0	0	21	27	C>A	ACCCCAC	Y43F8B.3	Non-transcribed
CD0048d	fan-1	Cisplatin	10	III	1929783	G	GG/GT	1	GT/GT	1.6e-09	0	0	37	0	0	0	30	17	37	47	C>A	GACCCAT	F53A3.4	Transcribed
CD0049a	fcd-2	Cisplatin	10	I	13753265	C	CC/AA	0.75	CC/AC	0.18	0	39	0	0	2	0	0	0	39	2	C>A	TTTCTAT	Y6B3B.5	Transcribed
CD0049a	fcd-2	Cisplatin	10	II	416127	G	GG/GT	1	GT/GT	1.1e-10	0	0	41	0	0	0	50	60	41	110	C>A	TACCTCA	C24H12.4	Transcribed
CD0049c	fcd-2	Cisplatin	10	III	2610045	A	AA/GG	0.76	AA/AG	0.18	41	0	0	0	0	0	2	0	41	2	T>C	TATTGTT	Y71H2B.5	Transcribed
CD0049c	fcd-2	Cisplatin	10	III	5267976	C	CC/AC	1	AC/AC	4.4e-09	1	40	0	0	30	21	0	0	41	51	C>A	ACCCAGA	ZC395.5	Non-transcribed
CD0049c	fcd-2	Cisplatin	10	III	368615	C	CC/AC	1	AC/AC	4.4e-08	0	32	0	0	33	32	0	0	32	65	C>A	CTCCTTT	K10F12.3	Non-transcribed
CD0049c	fcd-2	Cisplatin	10	V	14240575	G	GG/CG	1	CG/CG	4.4e-08	0	0	32	0	0	30	42	0	32	72	C>G	GCTCAAG	K02E11.10	Non-transcribed
CD0049d	fcd-2	Cisplatin	10	V	17623587	C	CC/AC	1	AC/AC	5.4e-13	0	49	0	0	26	21	0	0	49	47	C>A	CCCCTTC	F57G4.1	Non-transcribed
CD0049d	fcd-2	Cisplatin	10	V	17623588	T	TT/CT	1	CT/CT	1e-12	0	0	0	48	0	25	0	22	48	47	T>C	CCCTTCA	F57G4.1	Non-transcribed
CD0049d	fcd-2	Cisplatin	10	I	915335	A	AA/AG	1	AG/AG	1.8e-05	23	0	0	0	21	0	37	0	23	58	T>C	GACTTAG	Y95B8A.12	Non-transcribed
CD0049d	fcd-2	Cisplatin	10	III	5563350	C	CC/CG	1	CG/CG	1.1e-10	0	41	0	0	0	24	29	0	41	53	C>G	TTTCGGT	F09F7.3	Non-transcribed
CD0049d	fcd-2	Cisplatin	10	III	5563351	G	GG/GT	1	GT/GT	1.1e-10	0	0	41	0	0	0	25	28	41	53	C>A	CACCGAA	F09F7.3	Transcribed
CD0050a	lig-4; fcd-2	Cisplatin	10	II	5240223	C	CC/CT	1	CT/CT	0.00098	0	17	0	0	0	26	0	14	17	40	C>T	CACCTAC	No_gene	No_gene
CD0050a	lig-4; fcd-2	Cisplatin	10	III	11620878	A	AA/TT	0.8	AA/AT	0.19	44	0	0	0	0	0	0	2	44	2	T>A	ATTTCAA	Y66A7A.5	Transcribed
CD0050a	lig-4; fcd-2	Cisplatin	10	III	5735029	C	CC/GG	1	CG/GG	3.8e-12	0	46	0	0	0	0	57	0	46	57	C>G	GTGCAGA	B0244.10	Non-transcribed
CD0050a	lig-4; fcd-2	Cisplatin	10	V	19060457	A	AA/TT	1	AT/TT	4.1e-10	39	0	0	0	0	0	0	34	39	34	T>A	TTTTAAT	Y39B6A.19	Transcribed
CD0050a	lig-4; fcd-2	Cisplatin	10	IV	4159224	C	CC/AA	0.9	CC/AC	0.1	0	37	0	0	3	0	0	0	37	3	C>A	TCTCACG	K08D10.9	Non-transcribed
CD0050a	lig-4; fcd-2	Cisplatin	10	IV	14747891	C	CC/AC	1	AC/AC	0.0005	0	18	0	0	29	21	0	0	18	50	C>A	GACCCTA	No_gene	No_gene
CD0050c	lig-4; fcd-2	Cisplatin	10	V	3011733	A	AA/GG	1	AG/GG	5.2e-13	49	0	0	0	0	0	46	1	49	47	T>C	TTTTAAA	K12D9.11	Non-transcribed
CD0050c	lig-4; fcd-2	Cisplatin	10	V	5589530	C	CC/AA	1	AC/AA	1.2e-08	0	34	0	0	32	0	0	0	34	32	C>A	AAACTAA	No_gene	No_gene
CD0050c	lig-4; fcd-2	Cisplatin	10	IV	10133072	C	CC/CG	1	CG/CG	2.8e-11	0	43	0	0	0	28	33	0	43	61	C>G	AAGCGTT	K08F4.4	Non-transcribed
CD0050c	lig-4; fcd-2	Cisplatin	10	IV	14691605	A	AA/TT	1	AA/AT	1.2e-11	49	0	0	0	0	0	0	35	49	35	T>A	ACATGTT	No_gene	No_gene
CD0050c	lig-4; fcd-2	Cisplatin	10	II	349500	G	GG/AG	1	AG/AG	4.1e-10	0	0	39	0	13	0	15	0	39	28	C>T	TTTCAGA	D1069.4	Non-transcribed
CD0050c	lig-4; fcd-2	Cisplatin	10	II	557800	A	AA/TT	0.8	AA/AT	0.19	44	0	0	0	0	0	0	2	44	2	T>A	TTTTGAA	C09E8.1	Transcribed
CD0050d	lig-4; fcd-2	Cisplatin	10	I	1020969	C	CC/AC	1	AC/AC	2.5e-05	1	35	0	0	8	13	0	0	36	21	C>A	GCCCATT	Y34D9A.1	Transcribed
CD0050d	lig-4; fcd-2	Cisplatin	10	I	1020970	A	AA/AC	1	AC/AC	6.3e-09	35	0	0	0	13	8	0	0	35	21	T>G	AAATGGG	Y34D9A.1	Non-transcribed
CD0050d	lig-4; fcd-2	Cisplatin	10	I	9430065	A	AA/AT	1	AT/AT	1.4e-13	51	0	0	0	28	0	0	19	51	47	T>A	TTTTAAT	C17E4.6	Transcribed
CD0050d	lig-4; fcd-2	Cisplatin	10	II	15140186	T	TT/CT	1	CT/CT	0.002	0	0	0	16	0	4	0	14	16	18	T>C	GGGTCTC	Y53F4B.25	Non-transcribed
CD0051a	lig-4	Cisplatin	10	IV	12508718	A	AA/GG	0.75	AA/AG	0.18	45	0	0	0	0	0	2	0	45	2	T>C	CACTTGG	No_gene	No_gene
CD0051a	lig-4	Cisplatin	10	IV	2836784	T	TT/AT	1	AT/AT	1.6e-09	0	0	0	37	37	0	0	41	37	78	T>A	ACCTCTG	Y54G2A.8	Non-transcribed
CD0051a	lig-4	Cisplatin	10	IV	2963351	A	AA/TT	0.77	AA/AT	0.18	41	0	0	0	0	0	0	2	41	2	T>A	AAATTTT	Y54G2A.35	Transcribed
CD0051a	lig-4	Cisplatin	10	III	3527205	G	GG/AA	0.79	GG/AG	0.19	0	0	52	0	2	0	0	0	52	2	C>T	TTACATT	M01F1.7	Non-transcribed
CD0051a	lig-4	Cisplatin	10	II	3950903	G	GG/CC	0.81	GG/CG	0.19	0	0	51	0	0	2	0	0	51	2	C>G	GTTCCAG	T20H12.1	Transcribed
CD0051c	lig-4	Cisplatin	10	V	17773329	C	CC/CT	1	CT/CT	1e-12	0	48	0	0	0	24	0	19	48	43	C>T	AGACAAG	No_gene	No_gene
CD0051c	lig-4	Cisplatin	10	V	13646899	A	AA/AT	1	AT/AT	1e-12	48	0	0	0	8	0	0	8	48	16	T>A	TTTTAAT	No_gene	No_gene
CD0051c	lig-4	Cisplatin	10	II	7527267	C	CC/AC	1	AC/AC	7.5e-12	0	45	0	0	37	27	0	0	45	64	C>A	GAACACT	ZK1290.6	Non-transcribed
CD0051c	lig-4	Cisplatin	10	II	11746398	C	CC/AC	1	AC/AC	8e-10	0	38	0	0	15	19	0	0	38	34	C>A	GGACAGT	F13D12.7	Transcribed
CD0051c	lig-4	Cisplatin	10	III	11527224	C	CC/CG	1	CG/CG	4.1e-10	0	39	0	0	0	7	10	0	39	17	C>G	TTGCTCC	Y66D12A.15	Non-transcribed
CD0051c	lig-4	Cisplatin	10	X	2821454	C	CC/AC	1	AC/AC	2.8e-11	0	43	0	0	21	44	0	0	43	65	C>A	CTACTTC	C14A11.1	Non-transcribed
CD0051c	lig-4	Cisplatin	10	I	684768	G	GG/GT	1	GG/GG	0.0019	0	0	43	0	0	0	13	5	43	18	C>A	TTTCGAC	Y18H1A.10	Non-transcribed
CD0051d	lig-4	Cisplatin	10	V	5621256	C	CC/AC	1	AC/AC	3.8e-12	0	46	0	0	29	23	0	0	46	52	C>A	ACCCCTA	No_gene	No_gene
CD0051d	lig-4	Cisplatin	10	IV	4578909	C	CC/AC	1	AC/AC	3e-09	0	36	0	0	29	14	0	0	36	43	C>A	GTCCCTT	F28E10.1	Non-transcribed
CD0051d	lig-4	Cisplatin	10	III	5093097	T	TT/GT	1	GT/GT	1e-12	0	0	0	48	0	0	32	39	48	71	T>G	ATTTTTG	No_gene	No_gene
CD0051d	lig-4	Cisplatin	10	II	4283338	A	AA/GG	0.67	AA/AA	0.16	32	0	0	0	0	0	2	0	32	2	T>C	AAATTTT	C01F1.6	Non-transcribed
CD0051d	lig-4	Cisplatin	10	X	10839864	G	GG/GT	1	GT/GT	7.4e-12	0	0	45	0	0	0	17	16	45	33	C>A	CACCCCA	No_gene	No_gene
CD0051d	lig-4	Cisplatin	10	I	12877678	G	GG/GT	1	GT/GT	4.4e-08	0	0	32	0	0	0	6	11	32	17	C>A	ACCCCTG	No_gene	No_gene
CD0052a	mus-81	Cisplatin	10	X	6012328	G	GG/GT	1	GT/GT	9.4e-15	0	0	55	0	0	0	15	13	55	28	C>A	AACCTTT	No_gene	No_gene
CD0052a	mus-81	Cisplatin	10	III	199702	C	CC/TT	0.79	CC/CT	0.19	0	43	0	0	0	0	0	2	43	2	C>T	AATCAGT	F40G9.17	Non-transcribed
CD0052a	mus-81	Cisplatin	10	IV	14681956	C	CC/CG	1	CG/CG	6.9e-14	0	52	0	0	0	13	16	0	52	29	C>G	TCTCCTT	Y57G11C.31	Non-transcribed
CD0052c	mus-81	Cisplatin	10	V	3254819	G	GG/GT	1	GT/GT	8e-10	0	0	38	0	0	0	24	23	38	47	C>A	AACCTTG	T28A11.15	Non-transcribed
CD0052c	mus-81	Cisplatin	10	X	8177794	G	GG/AA	1	AG/AA	1e-12	0	0	48	0	58	0	0	0	48	58	C>T	TAACTGA	C17H11.1	Transcribed
CD0052c	mus-81	Cisplatin	10	X	9171562	C	CC/AC	1	AC/AC	3.8e-12	0	46	0	0	27	28	0	0	46	55	C>A	TGCCCTA	B0563.1	Non-transcribed
CD0052c	mus-81	Cisplatin	10	III	13593724	T	TT/CT	0.99	TT/TT	0.012	0	0	0	25	0	3	0	12	25	15	T>C	GATTTTT	No_gene	No_gene
CD0052c	mus-81	Cisplatin	10	III	13593727	T	TT/CT	0.98	TT/TT	0.016	0	0	0	25	0	3	0	12	25	15	T>C	TTTTCCG	No_gene	No_gene
CD0053a	polq-1	Cisplatin	10	X	17265242	A	AA/AT	1	AT/AT	3.9e-12	46	0	0	0	22	0	0	7	46	29	T>A	ACATAAT	Y40C7B.5	Non-transcribed
CD0053a	polq-1	Cisplatin	10	I	13199062	G	GG/AG	1	AG/AG	2.1e-10	0	0	40	0	12	0	14	0	40	26	C>T	ACCCGTT	No_gene	No_gene
CD0053a	polq-1	Cisplatin	10	I	13199063	G	GG/GT	1	GT/GT	1.1e-10	0	0	41	0	0	0	14	12	41	26	C>A	AACCCGT	No_gene	No_gene
CD0053c	polq-1	Cisplatin	10	X	7855320	C	CC/AC	1	AC/AC	5.6e-11	0	42	0	0	36	31	0	0	42	67	C>A	TTCCTCC	C54D2.5	Transcribed
CD0053c	polq-1	Cisplatin	10	X	14833470	G	GG/GT	1	GT/GT	1.6e-09	0	0	37	0	0	0	23	34	37	57	C>A	TTTCTCG	C27C12.7	Transcribed
CD0053c	polq-1	Cisplatin	10	III	874812	A	AA/GG	1	AG/GG	2.2e-10	40	0	0	0	0	0	83	0	40	83	T>C	ACGTTAA	T24C4.8	Transcribed
CD0053c	polq-1	Cisplatin	10	III	6807013	C	CC/GG	1	CC/CG	1.3e-07	0	35	0	0	0	0	22	0	35	22	C>G	TAACTGT	F28F5.3	Non-transcribed
CD0053c	polq-1	Cisplatin	10	I	12445513	G	GG/AA	1	AG/AA	6.1e-18	0	0	66	0	76	0	0	0	66	76	C>T	CATCCGA	C54C8.2	Transcribed
CD0053c	polq-1	Cisplatin	10	I	433956	T	TT/GG	1	TT/GT	1.2e-11	0	0	0	47	0	0	35	0	47	35	T>G	GGTTCTT	No_gene	No_gene
CD0053c	polq-1	Cisplatin	10	I	456269	C	CC/TT	0.72	CC/CT	0.17	0	43	0	0	0	0	0	2	43	2	C>T	ATGCGAA	C07F11.1	Non-transcribed
CD0053c	polq-1	Cisplatin	10	II	9817718	T	TT/CC	0.97	CT/CC	0.027	0	0	0	12	0	14	0	0	12	14	T>C	AAATAAT	No_gene	No_gene
CD0053c	polq-1	Cisplatin	10	V	5756124	G	GG/CC	1	CG/CC	0.0005	0	0	18	0	0	17	0	0	18	17	C>G	ATTCGCT	No_gene	No_gene
CD0053c	polq-1	Cisplatin	10	V	480954	T	TT/CC	1	TT/CT	1.8e-09	0	0	0	59	0	28	0	0	59	28	T>C	AGCTCGT	T01G6.8	Transcribed
CD0053d	polq-1	Cisplatin	10	X	1600134	C	CC/TT	0.8	CC/CT	0.19	0	57	0	0	0	0	0	2	57	2	C>T	ATTCAAA	No_gene	No_gene
CD0053d	polq-1	Cisplatin	10	I	2192666	A	AA/AC	1	AA/AA	7.9e-05	34	0	0	0	22	9	0	0	34	31	T>G	CGGTGGC	W03F11.6	Transcribed
CD0053d	polq-1	Cisplatin	10	I	7182254	T	TT/CT	1	CT/CT	7.6e-12	0	0	0	45	0	15	0	13	45	28	T>C	TAGTTTT	No_gene	No_gene
CD0053d	polq-1	Cisplatin	10	I	11735296	C	CC/AC	1	AC/AC	4.4e-08	0	32	0	0	67	36	0	0	32	103	C>A	TACCTAC	F35E2.3	Transcribed
CD0053d	polq-1	Cisplatin	10	I	11735313	C	CC/CG	1	CG/CG	3.3e-07	0	29	0	0	0	35	68	0	29	103	C>G	CAACCGA	F35E2.3	Transcribed
CD0053d	polq-1	Cisplatin	10	I	12845381	A	AA/TT	0.8	AA/AT	0.19	53	0	0	0	0	0	0	2	53	2	T>A	TTATTTT	Y18D10A.8	Transcribed
CD0053d	polq-1	Cisplatin	10	I	12848437	A	AA/AC	1	AA/AA	6.3e-06	27	0	1	0	35	10	0	1	28	46	T>G	AGGTGAC	Y18D10A.8	Transcribed
CD0053d	polq-1	Cisplatin	10	V	8556310	G	GG/AA	1	AG/AA	7.5e-12	0	0	45	0	74	0	0	0	45	74	C>T	TCCCTGT	No_gene	No_gene
CD0053d	polq-1	Cisplatin	10	V	17743377	C	CC/AA	1	AC/AA	1.8e-14	0	54	0	0	69	1	0	0	54	70	C>A	TCCCCCT	No_gene	No_gene
CD0053d	polq-1	Cisplatin	10	III	10723530	C	CC/CT	1	CT/CT	1.5e-11	0	44	0	0	0	11	0	9	44	20	C>T	AAGCCTA	W09D10.2	Transcribed
CD0053d	polq-1	Cisplatin	10	IV	2264095	A	AA/TT	0.8	AA/AT	0.19	39	0	0	0	0	0	0	2	39	2	T>A	TTTTCAA	No_gene	No_gene
CD0054a	slx-1	Cisplatin	10	III	2643184	G	GG/GT	1	GT/GT	9.4e-15	0	0	55	0	0	0	35	31	55	66	C>A	ATACCCT	No_gene	No_gene
CD0054c	slx-1	Cisplatin	10	IV	2809515	G	GG/GT	1	GG/GG	0.00012	0	0	52	0	0	0	20	6	52	26	C>A	CCGCTAG	Y54G2A.37	Transcribed
CD0054d	slx-1	Cisplatin	10	III	12833620	A	AA/GG	0.78	AA/AG	0.19	54	0	0	0	0	0	2	0	54	2	T>C	AGGTTTT	Y37D8A.3	Transcribed
CD0054d	slx-1	Cisplatin	10	IV	5528427	G	GG/GT	1	GT/GT	7.2e-14	0	0	52	0	0	0	23	20	52	43	C>A	AACCTTT	No_gene	No_gene
CD0054d	slx-1	Cisplatin	10	I	1991243	A	AA/GG	0.8	AA/AG	0.19	47	0	0	0	0	0	2	0	47	2	T>C	AATTTTG	Y20F4.3	Non-transcribed
CD0054d	slx-1	Cisplatin	10	II	12019641	C	CC/AA	0.75	CC/AC	0.18	0	54	0	0	2	0	0	0	54	2	C>A	TTCCTAG	Y17G7B.6	Non-transcribed
CD0054d	slx-1	Cisplatin	10	II	12370962	C	CC/AA	0.69	CC/AC	0.16	0	38	0	0	2	0	0	0	38	2	C>A	GTTCCAC	No_gene	No_gene
CD0055a	xpf-1	Cisplatin	10	III	10812385	A	AA/AT	1	AT/AT	2e-12	47	0	0	0	28	0	0	28	47	56	T>A	GTGTCTG	K11D9.2	Non-transcribed
CD0055a	xpf-1	Cisplatin	10	III	4605068	C	CC/CT	1	CT/CT	7e-14	0	52	0	0	0	24	0	39	52	63	C>T	GCTCTTA	F10F2.1	Transcribed
CD0055a	xpf-1	Cisplatin	10	X	1654433	G	GG/AG	1	AG/AG	4.2e-10	0	0	39	0	48	0	7	0	39	55	C>T	CCCCCGG	No_gene	No_gene
CD0055a	xpf-1	Cisplatin	10	X	3098798	T	TT/AT	1	AT/AT	7.5e-12	0	0	0	45	34	0	0	7	45	41	T>A	TCCTCCT	F52E4.7	Transcribed
CD0055a	xpf-1	Cisplatin	10	X	16555840	G	GG/AG	1	AG/AG	2.9e-11	0	0	43	0	28	0	25	0	43	53	C>T	TGTCTTT	No_gene	No_gene
CD0055a	xpf-1	Cisplatin	10	X	16555841	A	AA/AT	1	AT/AT	2.8e-11	43	0	0	0	24	0	0	28	43	52	T>A	CTGTCTT	No_gene	No_gene
CD0055a	xpf-1	Cisplatin	10	I	11663137	T	TT/CT	1	CT/CT	2.7e-13	0	0	0	50	0	18	0	15	50	33	T>C	AAATCTA	No_gene	No_gene
CD0055a	xpf-1	Cisplatin	10	I	11663138	C	CC/CT	1	CT/CT	5.1e-13	0	49	0	0	0	15	0	18	49	33	C>T	AATCTAA	No_gene	No_gene
CD0055a	xpf-1	Cisplatin	10	II	3476803	T	TT/GG	1	TT/GT	7.1e-11	0	0	0	48	0	0	44	1	48	45	T>G	GACTTAG	Y49F6B.7	Transcribed
CD0055a	xpf-1	Cisplatin	10	V	10008857	C	CC/AA	0.69	CC/AC	0.17	0	42	0	0	2	0	0	0	42	2	C>A	ACACCAC	No_gene	No_gene
CD0055a	xpf-1	Cisplatin	10	V	10391193	T	TT/GT	1	GT/GT	1.8e-14	0	0	0	54	0	0	19	21	54	40	T>G	TAATGGA	AC3.5	Non-transcribed
CD0055a	xpf-1	Cisplatin	10	V	10391194	G	GG/GT	1	GT/GT	1.9e-14	0	0	54	0	0	0	22	20	54	42	C>A	CTCCATT	AC3.5	Transcribed
CD0055a	xpf-1	Cisplatin	10	V	10412714	G	GG/GT	1	GT/GT	2.6e-09	1	0	36	0	0	0	24	26	37	50	C>A	TACCCAA	No_gene	No_gene
CD0055a	xpf-1	Cisplatin	10	V	4542816	A	AA/AT	1	AT/AT	3.6e-12	51	0	0	1	23	0	0	13	52	36	T>A	CACTAAA	T28F12.3	Non-transcribed
CD0055a	xpf-1	Cisplatin	10	V	20217462	G	GG/AG	1	AG/AG	2.8e-11	0	0	43	0	35	0	22	0	43	57	C>T	TGCCCAT	No_gene	No_gene
CD0055a	xpf-1	Cisplatin	10	IV	7042551	C	CC/AC	1	AC/AC	2e-12	0	47	0	0	12	39	0	0	47	51	C>A	GTCCTTG	C06G3.2	Non-transcribed
CD0055a	xpf-1	Cisplatin	10	IV	17196455	C	CC/CT	1	CT/CT	1.6e-09	0	37	0	0	0	19	0	33	37	52	C>T	GACCTTG	No_gene	No_gene
CD0055a	xpf-1	Cisplatin	10	IV	12799422	C	CC/AC	1	AC/AC	1.4e-11	0	44	0	0	21	29	0	0	44	50	C>A	GTCCCAA	No_gene	No_gene
CD0055c	xpf-1	Cisplatin	10	X	14302367	G	GG/AG	1	AG/AG	1e-12	0	0	48	0	20	0	38	0	48	58	C>T	GCTCATC	C11H1.5	Non-transcribed
CD0055c	xpf-1	Cisplatin	10	X	5407003	C	CC/CT	1	CT/CT	8e-10	0	38	0	0	0	16	0	79	38	95	C>T	TTTCAGT	C41A3.2	Transcribed
CD0055c	xpf-1	Cisplatin	10	X	519144	G	GG/TT	0.7	GG/GT	0.17	0	0	48	0	0	0	0	2	48	2	C>A	GCGCGCT	No_gene	No_gene
CD0055c	xpf-1	Cisplatin	10	I	2381260	C	CC/CT	1	CT/CT	3.5e-05	0	22	0	0	0	37	0	42	22	79	C>T	AGGCCGT	Y39G10AR.17	Transcribed
CD0055c	xpf-1	Cisplatin	10	I	14612014	G	GG/CG	1	CG/CG	4.5e-17	0	0	63	0	0	13	18	0	63	31	C>G	TTTCCGA	No_gene	No_gene
CD0055c	xpf-1	Cisplatin	10	I	7671611	C	CC/CT	1	CT/CT	7.7e-12	0	45	0	0	0	38	0	18	45	56	C>T	GCCCCCG	F26A3.6	Transcribed
CD0055c	xpf-1	Cisplatin	10	III	9924964	T	TT/AT	1	AT/AT	3.8e-12	0	0	0	46	12	0	0	28	46	40	T>A	ACATTTT	No_gene	No_gene
CD0055c	xpf-1	Cisplatin	10	III	3504729	G	GG/AG	1	AG/AG	4.4e-08	0	0	32	0	13	0	44	1	32	58	C>T	ATTCTTC	M01F1.3	Non-transcribed
CD0055c	xpf-1	Cisplatin	10	V	8205060	A	AA/AC	1	AC/AC	3.9e-12	46	0	0	0	45	57	0	0	46	102	T>G	CCTTGCT	K07C11.4	Transcribed
CD0055c	xpf-1	Cisplatin	10	V	16911737	A	AA/AT	1	AT/AT	5.2e-13	49	0	0	0	39	0	0	46	49	85	T>A	CATTTTT	No_gene	No_gene
CD0055c	xpf-1	Cisplatin	10	V	5913655	C	CC/CT	1	CT/CT	3.8e-12	0	46	0	0	0	42	0	53	46	95	C>T	GGACGAT	C04E6.13	Non-transcribed
CD0055c	xpf-1	Cisplatin	10	II	410605	C	CC/CG	1	CC/GG	4.5e-09	0	49	0	0	0	5	38	0	49	43	C>G	TTGCTCA	C24H12.5	Transcribed
CD0055d	xpf-1	Cisplatin	10	II	5115295	C	CC/CT	1	CT/CT	5.2e-13	0	49	0	0	0	51	0	47	49	98	C>T	ACTCCAC	F09C12.7	Transcribed
CD0055d	xpf-1	Cisplatin	10	V	8673733	C	CC/CT	1	CT/CT	2e-12	0	47	0	0	0	19	0	57	47	76	C>T	ATTCGTA	No_gene	No_gene
CD0055d	xpf-1	Cisplatin	10	V	16001954	C	CC/CT	1	CT/CT	1.4e-11	0	44	0	0	0	16	0	68	44	84	C>T	TCTCTGT	No_gene	No_gene
CD0055d	xpf-1	Cisplatin	10	V	16097708	G	GG/AG	1	AG/AG	2e-12	0	0	47	0	86	0	11	0	47	97	C>T	CACCTGC	F22B8.5	Non-transcribed
CD0055d	xpf-1	Cisplatin	10	X	1320633	G	GG/AG	1	AG/AG	2e-12	0	0	47	0	41	0	32	0	47	73	C>T	ACCCCTG	No_gene	No_gene
CD0055d	xpf-1	Cisplatin	10	X	15207937	G	GG/GT	1	GT/GT	0.0019	0	0	16	0	0	0	11	5	16	16	C>A	TTGCAAA	No_gene	No_gene
CD0055d	xpf-1	Cisplatin	10	I	3002454	G	GG/AG	1	AG/AG	3.4e-07	0	0	29	0	30	0	33	0	29	63	C>T	GTTCTCA	Y54E10BL.5	Non-transcribed
CD0055d	xpf-1	Cisplatin	10	I	3114819	G	GG/AG	1	AG/AG	4.4e-08	0	0	32	0	26	0	48	0	32	74	C>T	AATCGGC	No_gene	No_gene
CD0055d	xpf-1	Cisplatin	10	I	13470966	T	TT/AT	1	AT/AT	5.5e-11	0	0	0	42	21	0	0	40	42	61	T>A	GTCTCTG	No_gene	No_gene
CD0055d	xpf-1	Cisplatin	10	I	7701240	C	CC/AC	1	AC/AC	1.1e-10	0	41	0	0	13	35	0	0	41	48	C>A	CCCCTCC	T23G11.11	Non-transcribed
CD0055d	xpf-1	Cisplatin	10	III	10822987	G	GG/AG	1	AG/AG	7.4e-12	0	0	45	0	13	0	17	0	45	30	C>T	TTTCTAT	No_gene	No_gene
CD0055d	xpf-1	Cisplatin	10	III	7891575	C	CC/CT	1	CT/CT	7e-14	0	52	0	0	0	23	0	24	52	47	C>T	AAGCAGA	No_gene	No_gene
CD0055d	xpf-1	Cisplatin	10	III	11988657	A	AA/AG	1	AG/AG	1.8e-14	54	0	0	0	16	0	19	0	54	35	T>C	ATTTTCA	Y56A3A.31	Transcribed
CD0055d	xpf-1	Cisplatin	10	IV	62364	C	CC/CT	1	CT/CT	5.9e-09	0	35	0	0	0	26	0	15	35	41	C>T	CATCCAA	No_gene	No_gene
CD0055d	xpf-1	Cisplatin	10	IV	74932	C	CC/AC	1	AC/AC	8.2e-10	0	38	0	0	14	22	0	0	38	36	C>A	TACCCAT	No_gene	No_gene
CD0055d	xpf-1	Cisplatin	10	IV	164969	A	AA/AG	1	AG/AG	1.8e-14	54	0	0	0	32	1	46	0	54	79	T>C	GTCTCCG	No_gene	No_gene
CD0055d	xpf-1	Cisplatin	10	IV	1019966	G	GG/CC	0.99	CG/CC	0.0038	0	0	15	0	0	9	0	0	15	9	C>G	CGGCCCG	No_gene	No_gene
CD0055d	xpf-1	Cisplatin	10	IV	1019972	A	AA/GG	0.95	AA/AG	0.053	18	0	0	0	0	0	4	0	18	4	T>C	CCATCAC	No_gene	No_gene
CD0055d	xpf-1	Cisplatin	10	IV	9086234	C	CC/AC	1	AC/AC	2.9e-11	0	43	0	0	20	46	0	0	43	66	C>A	TTTCCTA	ZC410.4	Non-transcribed
CD0055d	xpf-1	Cisplatin	10	IV	8425919	T	TT/AT	1	AT/AT	1.7e-07	0	0	0	30	20	0	0	69	30	89	T>A	CTTTCTC	T26A8.2	Non-transcribed
CD0055d	xpf-1	Cisplatin	10	IV	8425920	C	CC/CT	1	CT/CT	1.7e-07	0	30	0	0	0	68	0	21	30	89	C>T	TTTCTCA	T26A8.2	Non-transcribed
CD0055d	xpf-1	Cisplatin	10	IV	4877464	C	CC/CT	1	CT/CT	8.3e-19	0	69	0	0	0	70	0	20	69	90	C>T	CTTCAAA	T08B6.7	Non-transcribed
CD0056a	N2	Cisplatin	50	III	1736735	G	GG/GT	1	GT/GT	5.9e-09	0	0	35	0	0	0	15	42	35	57	C>A	GACCCCC	No_gene	No_gene
CD0056a	N2	Cisplatin	50	III	10934513	C	CC/CT	1	CT/CT	6.3e-07	0	28	0	0	0	32	0	33	28	65	C>T	GATCCAC	M142.8	Non-transcribed
CD0056a	N2	Cisplatin	50	III	5983896	G	GG/GT	1	GT/GT	1.1e-10	0	0	41	0	0	0	34	28	41	62	C>A	TGCCCCT	No_gene	No_gene
CD0056a	N2	Cisplatin	50	II	5540547	T	TT/AA	1	AT/AA	5.6e-11	0	0	0	42	90	0	0	0	42	90	T>A	TTGTATC	No_gene	No_gene
CD0056a	N2	Cisplatin	50	II	10967877	A	AA/TT	1	AA/AT	4.9e-06	49	0	0	0	0	0	0	17	49	17	T>A	TCCTTTT	No_gene	No_gene
CD0056a	N2	Cisplatin	50	V	4030292	A	AA/AG	1	AG/AG	0.00099	17	0	0	0	18	0	22	0	17	40	T>C	CCCTCTC	No_gene	No_gene
CD0056a	N2	Cisplatin	50	V	4030293	G	GG/GT	1	GT/GT	0.0005	0	0	18	0	0	0	18	20	18	38	C>A	TCCCTCT	No_gene	No_gene
CD0056a	N2	Cisplatin	50	IV	3351079	G	GG/GT	1	GT/GT	3.1e-09	0	0	36	0	0	0	35	33	36	68	C>A	TATCCCT	No_gene	No_gene
CD0056a	N2	Cisplatin	50	IV	4992509	G	GG/GT	1	GT/GT	5.5e-11	0	0	42	0	0	0	45	40	42	85	C>A	TCCCCAG	E03H12.1	Transcribed
CD0056a	N2	Cisplatin	50	IV	5145974	G	GG/GT	1	GT/GT	1.6e-09	0	0	37	0	0	0	25	35	37	60	C>A	AAGCCTA	No_gene	No_gene
CD0056a	N2	Cisplatin	50	X	7725581	G	GG/GT	1	GT/GT	2.6e-13	0	0	50	0	0	0	43	31	50	74	C>A	TTCCTTG	No_gene	No_gene
CD0056a	N2	Cisplatin	50	X	13587407	A	AA/AG	1	AG/AG	4.8e-15	56	0	0	0	43	0	51	0	56	94	T>C	GCATACA	F54B11.3	Transcribed
CD0056a	N2	Cisplatin	50	X	14723450	G	GG/GT	1	GT/GT	1.5e-11	0	0	44	0	0	0	11	12	44	23	C>A	TTCCCTG	No_gene	No_gene
CD0056a	N2	Cisplatin	50	I	2857695	G	GG/CG	1	CG/CG	1.6e-09	0	0	37	0	0	40	52	0	37	92	C>G	CTTCGAT	No_gene	No_gene
CD0056a	N2	Cisplatin	50	I	12945569	C	CC/AC	1	AC/AC	4.3e-10	0	39	0	0	11	17	0	0	39	28	C>A	TCTCCCA	F08A8.2	Non-transcribed
CD0056a	N2	Cisplatin	50	I	14162761	A	AA/AG	1	AG/AG	2.4e-06	26	0	0	0	49	0	21	0	26	70	T>C	GACTTTT	No_gene	No_gene
CD0056c	N2	Cisplatin	50	I	9060141	G	GG/GT	1	GT/GT	2.8e-11	0	0	43	0	0	0	44	39	43	83	C>A	CACCTTT	W06D4.3	Transcribed
CD0056c	N2	Cisplatin	50	I	6110498	G	GG/GT	1	GT/GT	4.2e-10	0	0	39	0	0	0	24	31	39	55	C>A	CTCCCCA	T27A3.2	Transcribed
CD0056c	N2	Cisplatin	50	V	19824437	C	CC/CT	1	CT/CT	7e-14	0	52	0	0	0	32	0	41	52	73	C>T	GTGCCTC	Y116F11B.3	Transcribed
CD0056c	N2	Cisplatin	50	V	300801	C	CC/AA	0.68	CC/CC	0.16	0	41	0	0	2	0	0	0	41	2	C>A	TTTCAAA	F33E11.3	Transcribed
CD0056c	N2	Cisplatin	50	V	10987543	T	TT/AA	1	AT/AA	7.4e-12	0	0	0	45	42	0	0	0	45	42	T>A	TTTTAAA	No_gene	No_gene
CD0056c	N2	Cisplatin	50	III	1893406	C	CC/AC	1	AC/AC	2.6e-13	0	50	0	0	12	19	0	0	50	31	C>A	GTGCTGC	B0524.5	Transcribed
CD0056c	N2	Cisplatin	50	X	17636376	G	GG/GT	1	GT/GT	8.5e-08	0	0	31	0	0	0	35	35	31	70	C>A	AAGCCCG	H18N23.2	Non-transcribed
CD0056c	N2	Cisplatin	50	X	16322329	A	AA/AT	1	AT/AT	4.4e-08	32	0	0	0	9	0	0	19	32	28	T>A	AACTTTG	No_gene	No_gene
CD0056c	N2	Cisplatin	50	X	2811477	A	AA/AT	1	AT/AT	2.1e-10	40	0	0	0	33	0	0	43	40	76	T>A	CACTTTT	C14A11.6	Non-transcribed
CD0056c	N2	Cisplatin	50	IV	4432046	C	CC/CG	1	CG/CG	4.4e-08	0	32	0	0	0	53	39	0	32	92	C>G	AAGCCGA	R08C7.5	Non-transcribed
CD0056c	N2	Cisplatin	50	IV	16352222	T	TT/CT	1	CT/CT	2.1e-10	0	0	0	40	0	20	0	28	40	48	T>C	CAGTCTA	No_gene	No_gene
CD0056c	N2	Cisplatin	50	IV	13469258	T	TT/AT	1	AT/AT	8.1e-10	0	0	0	38	43	0	0	60	38	103	T>A	TGTTCAC	Y38H8A.5	Non-transcribed
CD0056d	N2	Cisplatin	50	II	10105941	G	GG/GT	1	GT/GT	4.1e-10	0	0	39	0	0	0	34	32	39	66	C>A	CCCCCTG	No_gene	No_gene
CD0056d	N2	Cisplatin	50	II	14574143	C	CC/TT	0.79	CC/CT	0.19	0	41	0	0	0	0	0	2	41	2	C>T	ATTCAAA	C01G12.1	Non-transcribed
CD0056d	N2	Cisplatin	50	II	15214679	G	GG/GT	1	GT/GT	1.5e-11	0	0	44	0	0	0	18	14	44	32	C>A	ATCCCGT	Y46E12BL.4	Transcribed
CD0056d	N2	Cisplatin	50	II	4163874	G	GG/GT	1	GT/GT	1.2e-17	0	0	65	0	0	0	54	15	65	69	C>A	TCCCCAC	R03H10.2	Transcribed
CD0056d	N2	Cisplatin	50	V	2827537	C	CC/AC	0.99	CC/CC	0.007	0	29	0	0	4	12	0	0	29	16	C>A	ACACTTT	No_gene	No_gene
CD0056d	N2	Cisplatin	50	V	17907281	A	AA/GG	0.8	AA/AG	0.19	41	0	0	0	0	0	2	0	41	2	T>C	CTTTTAA	No_gene	No_gene
CD0056d	N2	Cisplatin	50	V	12844697	G	GG/GT	0.99	GG/GG	0.0095	0	0	47	0	0	0	12	4	47	16	C>A	ACGCTCG	C44H9.6	Non-transcribed
CD0056d	N2	Cisplatin	50	V	552274	G	GG/GT	1	GT/GT	1.1e-10	0	0	41	0	0	0	46	40	41	86	C>A	CGCCACG	C14C6.8	Non-transcribed
CD0056d	N2	Cisplatin	50	IV	16043972	C	CC/AA	0.9	CC/AC	0.1	0	49	0	0	3	0	0	0	49	3	C>A	ACTCGTT	No_gene	No_gene
CD0056d	N2	Cisplatin	50	IV	2062653	A	AA/GG	0.8	AA/AG	0.19	33	0	0	0	0	0	2	0	33	2	T>C	ATTTAAT	No_gene	No_gene
CD0056d	N2	Cisplatin	50	IV	4559727	G	GG/GT	1	GT/GT	2.3e-08	0	0	33	0	0	0	39	36	33	75	C>A	ACTCCTG	No_gene	No_gene
CD0056d	N2	Cisplatin	50	I	1796841	C	CC/AC	1	AC/AC	8e-10	0	38	0	0	19	13	0	0	38	32	C>A	AATCGGC	No_gene	No_gene
CD0056d	N2	Cisplatin	50	I	4951545	C	CC/CT	1	CT/CT	1e-12	0	48	0	0	0	7	0	14	48	21	C>T	CAACCCA	F28B3.7	Transcribed
CD0057a	fan-1	Cisplatin	50	III	12939946	C	CC/AA	0.65	CC/CC	0.2	0	37	0	0	2	0	0	0	37	2	C>A	AAACATT	Y37D8A.22	Non-transcribed
CD0057a	fan-1	Cisplatin	50	IV	208050	G	GG/TT	0.65	GG/GG	0.2	0	0	45	0	0	0	0	2	45	2	C>A	AATCAAT	No_gene	No_gene
CD0057a	fan-1	Cisplatin	50	I	4946720	C	CC/AC	1	AC/AC	2.1e-10	0	40	0	0	28	26	0	0	40	54	C>A	TCCCCGC	F28B3.1	Non-transcribed
CD0057a	fan-1	Cisplatin	50	I	11955138	G	GG/TT	0.65	GG/GG	0.2	0	0	42	0	0	0	0	2	42	2	C>A	AAGCTAT	Y53C10A.12	Non-transcribed
CD0057a	fan-1	Cisplatin	50	V	19346495	T	TT/CT	1	CT/CT	1.5e-11	0	0	0	44	0	29	0	29	44	58	T>C	CTCTATT	C14B4.2	Transcribed
CD0057c	fan-1	Cisplatin	50	V	1052773	C	CC/CT	1	CT/CT	8.5e-08	0	31	0	0	0	21	0	9	31	30	C>T	AGCCTAA	K10C9.4	Transcribed
CD0057c	fan-1	Cisplatin	50	V	9746000	C	CC/AC	1	AC/AC	7.7e-12	0	45	0	0	39	24	0	0	45	63	C>A	TGCCCTG	F58E6.13	Non-transcribed
CD0057c	fan-1	Cisplatin	50	V	4316861	G	GG/GT	0.96	GG/GG	0.042	0	0	39	0	0	0	14	4	39	18	C>A	AAGCCGG	No_gene	No_gene
CD0057c	fan-1	Cisplatin	50	V	4606589	A	AA/GG	0.8	AA/AG	0.19	40	0	0	0	0	0	2	0	40	2	T>C	ATTTTTT	Y61A9LA.11	Non-transcribed
CD0057c	fan-1	Cisplatin	50	X	14475350	C	CC/AC	1	AC/AC	1e-12	0	48	0	0	33	36	0	0	48	69	C>A	AGGCTTT	M163.5	Non-transcribed
CD0057c	fan-1	Cisplatin	50	X	14475351	T	TT/AT	1	AT/AT	1e-12	0	0	0	48	34	0	0	37	48	71	T>A	GGCTTTT	M163.5	Non-transcribed
CD0057c	fan-1	Cisplatin	50	IV	2527241	A	AA/TT	1	AA/AT	0.00076	55	0	1	0	0	0	0	10	56	10	T>A	AAATTCA	Y69A2AR.16	Transcribed
CD0057c	fan-1	Cisplatin	50	II	6960893	T	TT/CT	1	TT/CC	0.00042	0	0	0	24	0	45	0	5	24	50	T>C	TTTTCTT	C15F1.3	Transcribed
CD0057c	fan-1	Cisplatin	50	I	692669	C	CC/AC	1	AC/AC	9.1e-06	0	24	0	0	39	7	0	0	24	46	C>A	ATCCTTC	Y18H1A.4	Transcribed
CD0057c	fan-1	Cisplatin	50	I	692670	T	TT/CT	1	CT/CT	9.2e-06	0	0	0	24	0	40	0	7	24	47	T>C	TCCTTCG	Y18H1A.4	Transcribed
CD0057c	fan-1	Cisplatin	50	I	1629055	A	AA/AG	1	AA/GG	0.00093	40	0	0	0	3	0	24	0	40	27	T>C	ACCTTTG	Y73E7A.1	Transcribed
CD0057c	fan-1	Cisplatin	50	I	1629056	G	GG/GT	1	GG/TT	1.9e-05	0	0	39	0	0	0	3	25	39	28	C>A	CACCTTT	Y73E7A.1	Transcribed
CD0057d	fan-1	Cisplatin	50	IV	2933579	C	CC/CT	1	CT/CT	2.1e-10	0	40	0	0	1	32	0	63	40	96	C>T	AGGCATA	Y54G2A.4	Non-transcribed
CD0057d	fan-1	Cisplatin	50	III	3667220	G	GG/GT	1	GT/GT	2.6e-13	0	0	50	0	0	0	7	17	50	24	C>A	GAGCTTT	No_gene	No_gene
CD0057d	fan-1	Cisplatin	50	III	8453332	C	CC/AC	1	AC/AC	4.1e-10	0	39	0	0	27	42	0	0	39	69	C>A	AACCTTG	No_gene	No_gene
CD0057d	fan-1	Cisplatin	50	III	8453333	T	TT/CT	1	CT/CT	2.1e-10	0	0	0	40	0	28	0	43	40	71	T>C	ACCTTGG	No_gene	No_gene
CD0057d	fan-1	Cisplatin	50	III	1398611	T	TT/AT	1	TT/TT	3.5e-14	0	0	0	59	8	0	0	32	59	40	T>A	TGCTAAT	Y82E9BR.4	Non-transcribed
CD0057d	fan-1	Cisplatin	50	I	721975	C	CC/TT	1	CT/TT	2.4e-06	0	26	0	0	0	0	0	66	26	66	C>T	TTTCAAT	Y18H1A.6	Non-transcribed
CD0057d	fan-1	Cisplatin	50	I	2651606	G	GG/GT	1	GT/GT	3.8e-08	0	0	37	1	0	0	33	17	38	50	C>A	CACCTAT	F40E3.5	Non-transcribed
CD0057d	fan-1	Cisplatin	50	I	12540098	T	TT/AT	1	AT/AT	1.6e-09	0	0	0	37	25	0	0	36	37	61	T>A	GTGTTGT	No_gene	No_gene
CD0057d	fan-1	Cisplatin	50	II	12094626	C	CC/GG	0.81	CC/CG	0.19	0	55	0	0	0	0	2	0	55	2	C>G	TTCCCCT	Y17G7B.17	Transcribed
CD0057d	fan-1	Cisplatin	50	X	7043431	G	GG/GT	0.98	GG/GG	0.023	0	0	64	0	0	0	13	4	64	17	C>A	CGGCTAA	No_gene	No_gene
CD0057d	fan-1	Cisplatin	50	X	9835985	A	AA/AG	1	AG/AG	1.1e-10	41	0	0	0	37	0	53	0	41	90	T>C	AGCTTTT	F47A4.5	Non-transcribed
CD0057d	fan-1	Cisplatin	50	X	10390	C	CC/AC	1	AC/AC	2.2e-19	0	71	0	0	30	56	0	0	71	86	C>A	CTGCTAG	No_gene	No_gene
CD0058a	fcd-2	Cisplatin	50	X	10945375	T	TT/AT	1	AT/AT	1.8e-14	0	0	0	54	40	0	0	35	54	75	T>A	GTCTGAC	T21B6.3	Transcribed
CD0058a	fcd-2	Cisplatin	50	X	410189	A	AA/AG	1	AG/AG	1.2e-09	42	0	1	0	39	0	20	0	43	59	T>C	TTCTCCC	ZK1193.2	Non-transcribed
CD0058a	fcd-2	Cisplatin	50	X	12756794	T	TT/AT	1	AT/AT	2.2e-10	0	0	0	40	23	0	0	8	40	31	T>A	AAGTCTT	F16H9.2	Transcribed
CD0058a	fcd-2	Cisplatin	50	I	446384	G	GG/GT	1	GT/GT	2.3e-08	0	0	33	0	0	0	8	41	33	49	C>A	ACGCCTA	C07F11.1	Transcribed
CD0058a	fcd-2	Cisplatin	50	I	1475110	C	CC/AC	1	AC/AC	3.6e-14	0	53	0	0	20	5	0	0	53	25	C>A	AAGCCTA	F47G6.2	Non-transcribed
CD0058a	fcd-2	Cisplatin	50	I	3522072	A	AA/TT	0.8	AA/AT	0.19	36	0	0	0	0	0	0	2	36	2	T>A	TTTTTGA	Y47G6A.6	Transcribed
CD0058a	fcd-2	Cisplatin	50	V	1465124	G	GG/CG	1	CG/CG	2.8e-11	0	0	43	0	0	16	60	0	43	76	C>G	GCACATT	R09B5.5	Transcribed
CD0058a	fcd-2	Cisplatin	50	V	12487259	G	GG/GT	1	GT/GT	1.1e-08	0	0	34	0	0	0	15	61	34	76	C>A	GTCCTTC	W04D2.3	Transcribed
CD0058c	fcd-2	Cisplatin	50	III	2133382	A	AA/GG	0.75	AA/AG	0.18	47	0	0	0	0	0	2	0	47	2	T>C	TAATAGC	No_gene	No_gene
CD0058c	fcd-2	Cisplatin	50	I	387414	T	TT/AA	0.81	TT/AT	0.19	0	0	0	47	2	0	0	0	47	2	T>A	TTTTCGG	R119.6	Non-transcribed
CD0058c	fcd-2	Cisplatin	50	I	3919001	G	GG/GT	1	GT/GT	5.5e-11	0	0	42	0	0	0	18	44	42	62	C>A	AGTCAAA	T20F5.5	Non-transcribed
CD0058c	fcd-2	Cisplatin	50	I	7635725	C	CC/AC	1	AC/AC	5.6e-11	0	42	0	0	21	14	0	0	42	35	C>A	CACCTTT	F29D11.2	Transcribed
CD0058c	fcd-2	Cisplatin	50	I	11993716	A	AA/AT	1	AT/AT	1.4e-13	51	0	0	0	13	0	0	13	51	26	T>A	TAATTGG	No_gene	No_gene
CD0058c	fcd-2	Cisplatin	50	I	13618494	G	GG/TT	0.65	GG/GG	0.2	0	0	23	0	0	0	0	2	23	2	C>A	TAGCGCA	Y6B3A.1	Non-transcribed
CD0058c	fcd-2	Cisplatin	50	IV	7082628	G	GG/AG	1	AG/AG	1.3e-15	0	0	58	0	28	0	15	0	58	43	C>T	GAGCACA	Y43B11AR.3	Non-transcribed
CD0058c	fcd-2	Cisplatin	50	II	13347375	T	TT/AT	1	AT/AT	2.1e-10	0	0	0	40	22	0	0	21	40	43	T>A	TGATAGA	Y48C3A.11	Transcribed
CD0058c	fcd-2	Cisplatin	50	II	13565588	C	CC/AA	0.65	CC/CC	0.2	0	33	0	0	2	0	0	0	33	2	C>A	AATCAAT	Y48E1B.3	Transcribed
CD0058c	fcd-2	Cisplatin	50	X	364716	T	TT/AT	1	AT/AT	2.1e-10	0	0	0	40	20	0	0	24	40	44	T>A	ACCTCTG	No_gene	No_gene
CD0058c	fcd-2	Cisplatin	50	V	18188453	G	GG/GT	1	GT/GT	4.4e-08	0	0	32	0	0	0	35	31	32	66	C>A	ACCCTTG	No_gene	No_gene
CD0058d	fcd-2	Cisplatin	50	III	9865757	C	CC/CT	0.91	CC/CC	0.087	0	51	0	0	0	12	0	3	51	15	C>T	AAACCGT	ZK757.4	Transcribed
CD0058d	fcd-2	Cisplatin	50	III	583405	C	CC/AC	1	AC/AC	4.1e-10	0	39	0	0	21	14	0	0	39	35	C>A	TACCTGA	Y55B1AL.3	Transcribed
CD0058d	fcd-2	Cisplatin	50	IV	3340644	T	TT/AT	1	AT/AT	5.5e-11	0	0	0	42	39	0	0	39	42	78	T>A	AACTGAG	F42A6.8	Transcribed
CD0058d	fcd-2	Cisplatin	50	IV	5459472	C	CC/AC	1	AC/AC	5.6e-11	0	42	0	0	33	38	0	0	42	71	C>A	CAGCCTA	Y4C6A.1	Non-transcribed
CD0058d	fcd-2	Cisplatin	50	IV	5459473	C	CC/CT	1	CT/CT	2.1e-10	0	40	0	0	0	37	0	31	40	68	C>T	AGCCTAA	Y4C6A.1	Non-transcribed
CD0058d	fcd-2	Cisplatin	50	I	5120386	C	CC/AC	1	AC/AC	4.1e-10	0	39	0	0	17	17	0	0	39	34	C>A	AATCCTG	Y110A7A.9	Non-transcribed
CD0058d	fcd-2	Cisplatin	50	I	3725634	A	AA/AT	1	AT/AT	9.3e-06	24	0	0	0	8	0	0	10	24	18	T>A	ATATCTA	No_gene	No_gene
CD0058d	fcd-2	Cisplatin	50	I	13786599	G	GG/GT	1	GT/GT	7.4e-12	0	0	45	0	0	0	14	26	45	40	C>A	GCACCTC	Y37H9A.3	Transcribed
CD0058d	fcd-2	Cisplatin	50	I	13326209	C	CC/AC	1	AC/AC	1.6e-09	0	37	0	0	32	28	0	0	37	60	C>A	GCGCCTC	T04D3.4	Non-transcribed
CD0058d	fcd-2	Cisplatin	50	I	585631	C	CC/CT	1	CT/CT	5.5e-11	0	42	0	0	0	27	0	9	42	36	C>T	ATACCAT	No_gene	No_gene
CD0058d	fcd-2	Cisplatin	50	II	12065156	G	GG/GT	1	GT/GT	1.5e-11	0	0	44	0	0	0	29	16	44	45	C>A	CTCCATG	Y17G7B.14	Transcribed
CD0058d	fcd-2	Cisplatin	50	II	13514174	G	GG/AG	1	AG/AG	1.6e-09	0	0	37	0	52	0	40	0	37	92	C>T	GTCCCAG	F54F11.2	Transcribed
CD0058d	fcd-2	Cisplatin	50	II	13514175	G	GG/GT	1	GT/GT	1.6e-09	0	0	37	0	0	0	39	51	37	90	C>A	AGTCCCA	F54F11.2	Transcribed
CD0058d	fcd-2	Cisplatin	50	II	14111917	T	TT/CT	1	CT/CT	5.9e-09	0	0	0	35	0	18	0	36	35	54	T>C	TTTTGAG	No_gene	No_gene
CD0058d	fcd-2	Cisplatin	50	II	14111920	G	GG/CG	1	CG/CG	2.2e-08	0	0	33	0	0	22	33	0	33	55	C>G	TGGCTCA	No_gene	No_gene
CD0058d	fcd-2	Cisplatin	50	II	14310587	C	CC/AC	1	AC/AC	7.5e-12	0	45	0	0	30	42	0	0	45	72	C>A	AACCGAA	Y54G11A.13	Transcribed
CD0058d	fcd-2	Cisplatin	50	II	14310588	G	GG/CG	1	CG/CG	3.8e-12	0	0	46	0	0	30	41	0	46	71	C>G	TTTCGGT	Y54G11A.13	Non-transcribed
CD0058d	fcd-2	Cisplatin	50	II	8518234	T	TT/AA	1	AT/AA	2.1e-10	0	0	0	40	62	0	0	0	40	62	T>A	TCATATC	T13H5.7	Non-transcribed
CD0058d	fcd-2	Cisplatin	50	V	678438	C	CC/AC	1	AC/AC	5.6e-11	0	42	0	0	43	28	0	0	42	71	C>A	TTCCTGC	F31F4.4	Non-transcribed
CD0058d	fcd-2	Cisplatin	50	V	8410852	C	CC/AC	1	AC/AC	1.5e-11	0	44	0	0	29	36	0	0	44	65	C>A	ATCCCAA	F52E1.2	Non-transcribed
CD0058d	fcd-2	Cisplatin	50	V	8410853	C	CC/CT	1	CT/CT	7.4e-12	0	45	0	0	0	35	0	29	45	64	C>T	TCCCAAA	F52E1.2	Non-transcribed
CD0058d	fcd-2	Cisplatin	50	V	20519660	T	TT/CT	1	CT/CT	3e-09	0	0	0	36	0	36	0	40	36	76	T>C	AGGTCAC	Y38H6C.25	Non-transcribed
CD0058d	fcd-2	Cisplatin	50	V	3871312	C	CC/CG	1	CG/CG	2e-12	0	47	0	0	0	38	21	0	47	59	C>G	TTTCTTG	C17E7.6	Transcribed
CD0058d	fcd-2	Cisplatin	50	X	599607	C	CC/AC	1	AC/AC	8.5e-10	1	43	0	0	35	33	0	0	44	68	C>A	CACCTTG	No_gene	No_gene
CD0059a	lig-4; fcd-2	Cisplatin	50	I	11462903	A	AA/AC	1	AC/AC	8.2e-10	38	0	0	0	36	24	0	0	38	60	T>G	CGCTAAA	ZK1025.3	Non-transcribed
CD0059a	lig-4; fcd-2	Cisplatin	50	I	1926409	G	GG/AA	0.79	GG/AG	0.19	0	0	48	0	2	0	0	0	48	2	C>T	TTCCATT	Y51F10.5	Transcribed
CD0059a	lig-4; fcd-2	Cisplatin	50	I	4268121	G	GG/GT	1	GT/GT	2.6e-13	0	0	50	0	0	0	21	12	50	33	C>A	TCCCTTT	C43E11.10	Non-transcribed
CD0059a	lig-4; fcd-2	Cisplatin	50	I	4697050	A	AA/AG	1	AG/AG	1.7e-07	30	0	0	0	32	0	32	0	30	64	T>C	ACCTCAG	T04D1.4	Non-transcribed
CD0059a	lig-4; fcd-2	Cisplatin	50	I	4697051	G	GG/GT	1	GT/GT	8.6e-08	0	0	31	0	0	0	32	32	31	64	C>A	CACCTCA	T04D1.4	Non-transcribed
CD0059a	lig-4; fcd-2	Cisplatin	50	III	1639061	G	GG/AG	1	AG/AG	2e-12	0	0	47	0	30	0	22	0	47	52	C>T	CTCCTTT	No_gene	No_gene
CD0059a	lig-4; fcd-2	Cisplatin	50	III	11766025	T	TT/CC	0.78	TT/CT	0.18	0	0	0	39	0	2	0	0	39	2	T>C	TTATTAT	C24H11.7	Transcribed
CD0059a	lig-4; fcd-2	Cisplatin	50	IV	314588	G	GG/GT	1	GT/GT	2e-12	0	0	47	0	0	0	26	31	47	57	C>A	ATCCCCT	No_gene	No_gene
CD0059a	lig-4; fcd-2	Cisplatin	50	IV	482488	A	AA/AT	1	AT/AT	3.1e-11	43	1	0	0	25	0	0	19	44	44	T>A	CCCTCGA	No_gene	No_gene
CD0059a	lig-4; fcd-2	Cisplatin	50	IV	13752515	C	CC/AC	1	AC/AC	1.4e-11	0	44	0	0	30	30	0	0	44	60	C>A	CTCCTTC	Y45F10D.13	Non-transcribed
CD0059a	lig-4; fcd-2	Cisplatin	50	V	5620959	C	CC/AC	1	AC/AC	1.3e-15	0	58	0	0	17	18	0	0	58	35	C>A	CTCCCCG	No_gene	No_gene
CD0059a	lig-4; fcd-2	Cisplatin	50	V	15152884	C	CC/AC	1	AC/AC	2.8e-11	0	43	0	0	33	29	0	0	43	62	C>A	GACCTTT	T09F5.15	Non-transcribed
CD0059a	lig-4; fcd-2	Cisplatin	50	V	15152885	T	TT/CT	1	CT/CT	2.9e-11	0	0	0	43	0	33	0	30	43	63	T>C	ACCTTTC	T09F5.15	Non-transcribed
CD0059c	lig-4; fcd-2	Cisplatin	50	V	9175850	G	GG/GT	1	GT/GT	5.1e-13	0	0	49	0	0	0	21	23	49	44	C>A	TATCCAT	C24B5.2	Transcribed
CD0059c	lig-4; fcd-2	Cisplatin	50	V	9175851	A	AA/AT	1	AT/AT	5.2e-13	49	0	0	0	21	0	0	23	49	44	T>A	ATATCCA	C24B5.2	Transcribed
CD0059c	lig-4; fcd-2	Cisplatin	50	IV	17054899	T	TT/AT	1	AT/AT	2.5e-15	0	0	0	57	23	0	0	34	57	57	T>A	CACTGAA	Y116A8C.23	Non-transcribed
CD0059c	lig-4; fcd-2	Cisplatin	50	IV	16866260	G	GG/AG	1	AG/AG	4.7e-06	0	0	25	0	16	0	18	1	25	35	C>T	CCTCGTC	T06A10.3	Transcribed
CD0059c	lig-4; fcd-2	Cisplatin	50	IV	16866261	A	AA/AT	1	AT/AT	4.7e-06	25	0	0	0	18	0	0	16	25	34	T>A	TCCTCGT	T06A10.3	Transcribed
CD0059c	lig-4; fcd-2	Cisplatin	50	I	898539	G	GG/CC	0.81	GG/CG	0.19	0	0	40	0	0	2	0	0	40	2	C>G	TAGCGAT	Y95B8A.5	Transcribed
CD0059c	lig-4; fcd-2	Cisplatin	50	I	12005654	G	GG/GT	1	GT/GT	7.9e-10	0	0	38	0	0	0	44	30	38	74	C>A	TTCCTCG	Y53C10A.7	Transcribed
CD0059c	lig-4; fcd-2	Cisplatin	50	I	12785783	G	GG/AG	1	AG/AG	1.1e-10	0	0	41	0	21	0	23	0	41	44	C>T	ACTCGGT	No_gene	No_gene
CD0059c	lig-4; fcd-2	Cisplatin	50	III	2021797	T	TT/AA	0.8	TT/AT	0.19	0	0	0	46	2	0	0	0	46	2	T>A	TTTTAAA	No_gene	No_gene
CD0059c	lig-4; fcd-2	Cisplatin	50	III	2058719	G	GG/TT	0.64	GG/GG	0.2	0	0	33	0	0	0	0	2	33	2	C>A	TTTCCAA	No_gene	No_gene
CD0059c	lig-4; fcd-2	Cisplatin	50	III	6418579	C	CC/AC	1	AC/AC	1.5e-11	0	44	0	0	20	53	0	0	44	73	C>A	CACCTGC	C05D11.7	Transcribed
CD0059c	lig-4; fcd-2	Cisplatin	50	III	6418580	T	TT/CT	1	CT/CT	7.5e-12	0	0	0	45	0	20	0	53	45	73	T>C	ACCTGCA	C05D11.7	Transcribed
CD0059c	lig-4; fcd-2	Cisplatin	50	II	11664676	C	CC/CT	1	CT/CT	1.1e-10	0	41	0	0	0	48	0	48	41	96	C>T	GAGCCAT	C47D12.1	Transcribed
CD0059c	lig-4; fcd-2	Cisplatin	50	II	13550917	G	GG/TT	0.64	GG/GG	0.2	0	0	54	0	0	0	0	2	54	2	C>A	CCCCACA	Y48E1B.3	Non-transcribed
CD0059d	lig-4; fcd-2	Cisplatin	50	III	2116313	T	TT/AA	1	AT/AA	8.7e-08	0	0	0	31	37	0	0	0	31	37	T>A	TGATTGG	Y48G9A.11	Transcribed
CD0059d	lig-4; fcd-2	Cisplatin	50	III	4933695	C	CC/AC	1	AC/AC	3.9e-12	0	46	0	0	33	30	0	0	46	63	C>A	AACCAAA	C26E6.7	Non-transcribed
CD0059d	lig-4; fcd-2	Cisplatin	50	III	4933696	A	AA/AC	1	AC/AC	7.5e-12	45	0	0	0	31	32	0	0	45	63	T>G	CTTTGGT	C26E6.7	Transcribed
CD0059d	lig-4; fcd-2	Cisplatin	50	II	14097086	G	GG/GT	1	GT/GT	0.00051	0	0	18	0	0	0	16	42	18	58	C>A	CGCCCTT	Y39G8C.2	Non-transcribed
CD0059d	lig-4; fcd-2	Cisplatin	50	II	969723	C	CC/AC	1	AC/AC	5.6e-11	0	42	0	0	8	10	0	0	42	18	C>A	ACCCCTC	C32B5.6	Non-transcribed
CD0059d	lig-4; fcd-2	Cisplatin	50	II	2951328	C	CC/AC	1	AC/AC	1.4e-11	0	44	0	0	19	51	0	0	44	70	C>A	CTCCCAA	T11F1.9	Transcribed
CD0059d	lig-4; fcd-2	Cisplatin	50	I	5612499	C	CC/AA	1	CC/AC	1.8e-09	0	45	0	0	28	0	0	0	45	28	C>A	TTACAAA	F46F11.9	Transcribed
CD0059d	lig-4; fcd-2	Cisplatin	50	I	11224693	T	TT/AA	1	TT/AT	4.2e-05	1	0	0	35	14	0	0	0	36	14	T>A	AATTAAA	No_gene	No_gene
CD0059d	lig-4; fcd-2	Cisplatin	50	I	14870138	T	TT/AA	1	AT/AA	7.4e-12	0	0	0	45	52	0	0	0	45	52	T>A	GATTGCC	F11C3.1	Non-transcribed
CD0059d	lig-4; fcd-2	Cisplatin	50	IV	16588593	T	TT/AA	1	TT/AT	1.8e-09	0	0	0	51	28	0	0	0	51	28	T>A	ATTTCAA	No_gene	No_gene
CD0059d	lig-4; fcd-2	Cisplatin	50	IV	16694424	A	AA/GG	1	AG/GG	6.4e-07	28	0	0	0	0	0	50	0	28	50	T>C	CAGTAAC	No_gene	No_gene
CD0059d	lig-4; fcd-2	Cisplatin	50	IV	16783439	A	AA/TT	1	AA/AT	0.00075	42	1	0	0	0	0	0	10	43	10	T>A	TAATTTA	Y43D4A.5	Transcribed
CD0059d	lig-4; fcd-2	Cisplatin	50	IV	17036383	C	CC/TT	1	CC/CT	0.00075	0	46	0	0	0	0	0	10	46	10	C>T	GTCCTGT	No_gene	No_gene
CD0059d	lig-4; fcd-2	Cisplatin	50	IV	17386326	T	TT/AA	1	TT/AT	1e-05	0	0	0	54	16	0	0	0	54	16	T>A	TGATTTG	C30H6.12	Non-transcribed
CD0059d	lig-4; fcd-2	Cisplatin	50	IV	4074611	T	TT/AT	1	AT/AT	4.9e-15	0	0	0	56	23	1	0	20	56	44	T>A	TACTCAC	W03D2.1	Non-transcribed
CD0059d	lig-4; fcd-2	Cisplatin	50	IV	4074612	C	CC/AC	1	AC/AC	9.5e-15	0	55	0	0	23	21	0	0	55	44	C>A	ACTCACC	W03D2.1	Non-transcribed
CD0059d	lig-4; fcd-2	Cisplatin	50	IV	15958374	T	TT/AA	1	AT/AA	7.5e-12	0	0	0	45	44	0	0	0	45	44	T>A	GGCTGCT	Y105C5B.16	Transcribed
CD0059d	lig-4; fcd-2	Cisplatin	50	IV	16072354	A	AA/CC	1	AA/AC	8.8e-10	44	0	0	0	0	29	0	0	44	29	T>G	TTGTAAT	No_gene	No_gene
CD0059d	lig-4; fcd-2	Cisplatin	50	IV	16097979	C	CC/AC	1	AC/AC	1.5e-11	0	44	0	0	18	17	0	0	44	35	C>A	TCCCCAC	No_gene	No_gene
CD0059d	lig-4; fcd-2	Cisplatin	50	IV	16365034	A	AA/TT	1	AA/AT	8.7e-05	64	0	0	0	0	0	0	13	64	13	T>A	TTTTAAT	No_gene	No_gene
CD0059d	lig-4; fcd-2	Cisplatin	50	IV	16380767	A	AA/CC	1	AA/AC	7.6e-09	43	0	0	0	0	26	0	0	43	26	T>G	ATATCAA	Y7A9D.59	Transcribed
CD0059d	lig-4; fcd-2	Cisplatin	50	IV	7503662	G	GG/TT	1	GT/TT	2.8e-11	0	0	43	0	0	0	0	49	43	49	C>A	TCTCGAC	R05G6.6	Transcribed
CD0059d	lig-4; fcd-2	Cisplatin	50	V	9019580	C	CC/CG	1	CG/CG	1.5e-11	0	44	0	0	0	19	15	0	44	34	C>G	AGGCTCT	R03H4.5	Transcribed
CD0059d	lig-4; fcd-2	Cisplatin	50	V	14978666	G	GG/GT	1	GT/GT	3.7e-14	0	0	53	0	0	0	22	21	53	43	C>A	TACCCAG	F02D8.1	Non-transcribed
CD0059d	lig-4; fcd-2	Cisplatin	50	X	15502565	C	CC/AC	1	AC/AC	5.9e-09	0	35	0	0	16	26	0	0	35	42	C>A	TACCTCT	H13N06.6	Transcribed
CD0059d	lig-4; fcd-2	Cisplatin	50	X	15502566	T	TT/CT	1	CT/CT	3.1e-09	0	0	0	36	0	17	0	26	36	43	T>C	ACCTCTT	H13N06.6	Transcribed
CD0059d	lig-4; fcd-2	Cisplatin	50	X	473253	A	AA/TT	0.99	AA/AT	0.013	44	0	0	0	0	0	0	6	44	6	T>A	TTTTAAA	No_gene	No_gene
CD0059d	lig-4; fcd-2	Cisplatin	50	X	5673413	C	CC/AC	1	AC/AC	7.2e-14	0	52	0	0	32	31	0	0	52	63	C>A	CCCCCAC	T22B7.1	Non-transcribed
CD0060a	lig-4	Cisplatin	50	III	10267701	T	TT/GT	1	GT/GT	3.1e-09	0	0	0	36	0	0	19	15	36	34	T>G	AAGTGAG	No_gene	No_gene
CD0060a	lig-4	Cisplatin	50	V	19837329	C	CC/TT	0.79	CC/CT	0.19	0	39	0	0	0	0	0	2	39	2	C>T	ATTCAAA	Y116F11B.5	Non-transcribed
CD0060a	lig-4	Cisplatin	50	I	13502908	A	AA/AT	1	AT/AT	2.6e-13	50	0	0	0	15	0	0	15	50	30	T>A	TTCTCAT	No_gene	No_gene
CD0060a	lig-4	Cisplatin	50	I	13502909	G	GG/GT	1	GT/GT	2.8e-13	0	0	50	0	0	0	16	15	50	31	C>A	CTTCTCA	No_gene	No_gene
CD0060a	lig-4	Cisplatin	50	I	10498100	G	GG/GT	1	GT/GT	4.4e-08	0	0	32	0	0	0	13	16	32	29	C>A	CTCCCCG	No_gene	No_gene
CD0060a	lig-4	Cisplatin	50	I	2679483	G	GG/GT	1	GT/GT	0.00013	0	0	20	0	0	0	16	21	20	37	C>A	CTCCCTG	F32B5.7	Non-transcribed
CD0060a	lig-4	Cisplatin	50	II	2884138	C	CC/TT	0.79	CC/CT	0.19	0	37	0	0	0	0	0	2	37	2	C>T	AATCACA	Y110A2AL.12	Transcribed
CD0060a	lig-4	Cisplatin	50	II	11321507	G	GG/GT	1	GT/GT	8.6e-08	0	0	31	0	0	0	19	37	31	56	C>A	AACCTTG	No_gene	No_gene
CD0060a	lig-4	Cisplatin	50	II	9820589	C	CC/CT	1	CT/CT	3.5e-05	0	22	0	0	0	19	0	5	22	24	C>T	AAACTCC	No_gene	No_gene
CD0060a	lig-4	Cisplatin	50	IV	15374962	C	CC/AC	0.85	CC/CC	0.13	1	26	0	0	4	16	0	0	27	20	C>A	CGCCAAA	No_gene	No_gene
CD0060c	lig-4	Cisplatin	50	V	1205298	T	TT/CT	1	CT/CT	9.2e-06	0	0	0	24	0	31	0	28	24	59	T>C	GTCTCGC	No_gene	No_gene
CD0060c	lig-4	Cisplatin	50	V	9715363	C	CC/AC	1	AC/AC	2.8e-11	0	43	0	0	14	25	0	0	43	39	C>A	CATCCGC	F40F9.3	Non-transcribed
CD0060c	lig-4	Cisplatin	50	IV	5297379	C	CC/AC	1	AC/AC	1.2e-08	0	34	0	0	32	17	0	0	34	49	C>A	TTCCTTT	ZK354.6	Transcribed
CD0060c	lig-4	Cisplatin	50	IV	5297380	T	TT/AT	1	AT/AT	1.2e-08	0	0	0	34	32	0	0	17	34	49	T>A	TCCTTTT	ZK354.6	Transcribed
CD0060c	lig-4	Cisplatin	50	IV	8848611	G	GG/GT	1	GT/GT	6.6e-16	0	0	59	0	0	0	33	19	59	52	C>A	TACCTGA	T11B7.3	Transcribed
CD0060c	lig-4	Cisplatin	50	III	10860345	T	TT/AA	0.77	TT/AT	0.18	0	0	0	44	2	0	0	0	44	2	T>A	CCATTAT	Y39A1C.2	Non-transcribed
CD0060c	lig-4	Cisplatin	50	III	10962997	G	GG/GT	1	GT/GT	0.0037	0	0	15	0	0	0	28	26	15	54	C>A	ATCCCTC	W05B2.2	Non-transcribed
CD0060c	lig-4	Cisplatin	50	II	2700077	G	GG/GT	1	GT/GT	1.6e-09	0	0	37	0	0	0	22	32	37	54	C>A	TACCTTT	F34D6.6	Non-transcribed
CD0060c	lig-4	Cisplatin	50	II	6698122	T	TT/CT	1	CT/CT	3.8e-12	0	0	0	46	0	11	0	13	46	24	T>C	AAGTTTC	No_gene	No_gene
CD0060c	lig-4	Cisplatin	50	II	13074118	A	AA/TT	1	AT/TT	1.1e-10	41	0	0	0	0	0	0	52	41	52	T>A	CGATGCC	F42G4.5	Transcribed
CD0060c	lig-4	Cisplatin	50	I	11960023	C	CC/AC	1	AC/AC	1.1e-10	0	41	0	0	28	29	0	0	41	57	C>A	ATCCCAA	Y53C10A.12	Transcribed
CD0060d	lig-4	Cisplatin	50	II	12703346	G	GG/AG	1	AG/AG	7.5e-12	0	0	45	0	13	0	15	0	45	28	C>T	GCACGAA	Y46G5A.1	Transcribed
CD0060d	lig-4	Cisplatin	50	II	5666411	A	AA/AT	1	AT/AT	5.2e-13	49	0	0	0	33	0	0	25	49	58	T>A	CTGTCAC	C25H3.16	Transcribed
CD0060d	lig-4	Cisplatin	50	II	3355477	C	CC/AC	1	AC/AC	1.5e-09	0	37	0	0	33	30	0	0	37	63	C>A	ATCCTAC	F14D2.4	Non-transcribed
CD0060d	lig-4	Cisplatin	50	II	2256123	T	TT/CC	0.95	TT/CT	0.053	0	0	0	45	0	4	0	0	45	4	T>C	CCTTGAT	No_gene	No_gene
CD0060d	lig-4	Cisplatin	50	II	2256170	T	TT/AA	0.95	TT/AT	0.053	0	0	0	41	4	0	0	0	41	4	T>A	TAATACC	No_gene	No_gene
CD0060d	lig-4	Cisplatin	50	II	2256175	C	CC/TT	0.97	CC/CT	0.027	0	45	0	0	0	0	0	5	45	5	C>T	CCACTTG	No_gene	No_gene
CD0060d	lig-4	Cisplatin	50	II	2256190	G	GG/TT	1	GG/GT	5e-06	0	0	44	0	0	0	0	17	44	17	C>A	CTACCGG	No_gene	No_gene
CD0060d	lig-4	Cisplatin	50	II	2256191	T	TT/AA	1	TT/AT	4.9e-06	0	0	0	44	17	0	0	0	44	17	T>A	CGGTAGG	No_gene	No_gene
CD0060d	lig-4	Cisplatin	50	X	1536271	T	TT/CT	1	CT/CT	5.6e-11	0	0	0	42	0	31	0	28	42	59	T>C	CTGTTTT	No_gene	No_gene
CD0060d	lig-4	Cisplatin	50	X	3516965	G	GG/GT	1	GT/GT	2.1e-10	0	0	40	0	0	0	15	12	40	27	C>A	AAGCTCT	No_gene	No_gene
CD0060d	lig-4	Cisplatin	50	X	3516966	C	CC/CT	1	CT/CT	1.1e-10	0	41	0	0	0	15	0	12	41	27	C>T	GAGCTTT	No_gene	No_gene
CD0060d	lig-4	Cisplatin	50	I	9124336	C	CC/CT	1	CT/CT	5.2e-13	0	49	0	0	0	18	0	14	49	32	C>T	TTACCTT	ZK858.2	Transcribed
CD0060d	lig-4	Cisplatin	50	I	9124337	C	CC/CT	1	CT/CT	5.3e-13	0	49	0	0	1	19	0	12	49	32	C>T	TACCTTG	ZK858.2	Transcribed
CD0060d	lig-4	Cisplatin	50	I	8241889	T	TT/GG	1	GT/GG	7.5e-12	0	0	0	45	0	0	55	0	45	55	T>G	ATTTAAC	No_gene	No_gene
CD0060d	lig-4	Cisplatin	50	V	19895633	G	GG/AA	0.79	GG/AG	0.19	0	0	52	0	2	0	0	0	52	2	C>T	TTCCCCA	No_gene	No_gene
CD0060d	lig-4	Cisplatin	50	V	1448546	G	GG/AG	1	AG/AG	6.3e-07	0	0	28	0	20	0	21	0	28	41	C>T	ATGCCTG	R09B5.8	Transcribed
CD0060d	lig-4	Cisplatin	50	V	5193933	G	GG/AA	1	GG/AG	0.00076	0	0	29	0	10	0	0	0	29	10	C>T	CACCACC	C03A7.14	Non-transcribed
CD0061a	mus-81	Cisplatin	50	II	756704	G	GG/GT	1	GT/GT	6.5e-07	0	0	28	0	0	0	17	20	28	37	C>A	CACCCTC	C08G5.7	Non-transcribed
CD0061a	mus-81	Cisplatin	50	II	14442606	C	CC/AA	0.66	CC/CC	0.19	0	48	0	0	2	0	0	0	48	2	C>A	TTCCTCT	K04B12.3	Non-transcribed
CD0061a	mus-81	Cisplatin	50	X	877768	A	AA/AG	1	AG/AG	2.1e-10	40	0	0	0	39	0	47	0	40	86	T>C	GTCTGTC	ZC13.1	Transcribed
CD0061c	mus-81	Cisplatin	50	IV	2237046	G	GG/AG	1	AG/AG	3.2e-09	0	0	36	0	15	0	14	0	36	29	C>T	AATCAAT	No_gene	No_gene
CD0061c	mus-81	Cisplatin	50	IV	2237116	G	GG/AG	1	AG/AG	2.2e-08	0	0	33	0	16	0	16	0	33	32	C>T	ATACATT	No_gene	No_gene
CD0061c	mus-81	Cisplatin	50	IV	8429150	T	TT/CT	1	CT/CT	2.7e-13	0	0	0	50	0	35	0	34	50	69	T>C	GTCTGTG	T26A8.4	Transcribed
CD0061c	mus-81	Cisplatin	50	IV	8429213	G	GG/GT	1	GT/GT	1.1e-10	0	0	41	0	0	0	22	26	41	48	C>A	AACCTTT	T26A8.4	Non-transcribed
CD0061c	mus-81	Cisplatin	50	IV	4641253	G	GG/CG	1	CG/CG	3e-09	0	0	36	0	0	34	42	0	36	76	C>G	TTCCTTG	No_gene	No_gene
CD0061c	mus-81	Cisplatin	50	IV	4822890	T	TT/CC	0.77	TT/CT	0.18	0	0	0	51	0	2	0	0	51	2	T>C	AAATTGA	No_gene	No_gene
CD0061c	mus-81	Cisplatin	50	III	3118370	G	GG/AA	0.8	GG/AG	0.19	0	0	42	0	2	0	0	0	42	2	C>T	TTCCAAT	Y53G8B.4	Non-transcribed
CD0061c	mus-81	Cisplatin	50	II	11530000	A	AA/AG	1	AG/AG	0.0005	18	0	0	0	18	0	5	0	18	23	T>C	GCTTCTA	Y62F5A.1	Non-transcribed
CD0061c	mus-81	Cisplatin	50	I	1681250	A	AA/TT	0.8	AA/AT	0.19	34	0	0	0	0	0	0	2	34	2	T>A	AATTATT	Y71G12B.16	Transcribed
CD0061c	mus-81	Cisplatin	50	X	255359	A	AA/AG	1	AA/GG	5.9e-07	54	1	0	0	3	0	14	0	55	17	T>C	ACCTTTA	No_gene	No_gene
CD0061c	mus-81	Cisplatin	50	X	255360	G	GG/GT	1	GG/TT	1.1e-07	0	0	54	1	0	0	3	14	55	17	C>A	TACCTTT	No_gene	No_gene
CD0061d	mus-81	Cisplatin	50	IV	1446588	A	AA/TT	1	AA/AT	2.8e-07	45	0	0	0	0	0	0	21	45	21	T>A	TTTTAAA	Y77E11A.3	Transcribed
CD0061d	mus-81	Cisplatin	50	III	4255864	G	GG/GT	1	GT/GT	8.3e-10	0	0	38	0	0	0	20	23	38	43	C>A	TTCCTCG	T08A11.1	Non-transcribed
CD0061d	mus-81	Cisplatin	50	III	5833189	A	AA/TT	1	AA/AT	2.1e-10	44	0	0	0	0	0	0	31	44	31	T>A	TTTTAAA	R12B2.5	Non-transcribed
CD0061d	mus-81	Cisplatin	50	III	6153213	A	AA/AC	1	AA/AA	0.0031	18	0	0	0	20	6	0	1	18	27	T>G	CGGTGGG	Y42G9A.1	Transcribed
CD0061d	mus-81	Cisplatin	50	V	15550138	C	CC/CT	1	CT/CT	6.6e-07	0	28	0	0	0	21	0	22	28	43	C>T	CGGCTGT	No_gene	No_gene
CD0061d	mus-81	Cisplatin	50	V	15550151	C	CC/CG	1	CG/CG	4.4e-08	0	32	0	0	0	15	22	0	32	37	C>G	GTGCTAC	No_gene	No_gene
CD0061d	mus-81	Cisplatin	50	I	6679150	G	GG/AA	1	GG/AG	7.6e-09	0	0	47	0	26	0	0	0	47	26	C>T	TTTCAAC	No_gene	No_gene
CD0062a	polq-1	Cisplatin	50	III	11174352	C	CC/AA	0.67	CC/CC	0.17	0	52	0	0	2	0	0	0	52	2	C>A	ATACGTT	Y47D3A.6	Transcribed
CD0062a	polq-1	Cisplatin	50	III	11174361	T	TT/AA	0.8	TT/AT	0.19	0	0	0	49	2	0	0	0	49	2	T>A	GAATAAA	Y47D3A.6	Transcribed
CD0062a	polq-1	Cisplatin	50	III	11174375	C	CC/AA	0.67	CC/CC	0.17	0	47	0	0	2	0	0	0	47	2	C>A	ACACATA	Y47D3A.6	Transcribed
CD0062a	polq-1	Cisplatin	50	III	7878665	G	GG/GT	1	GT/GT	4.4e-08	0	0	32	0	0	0	48	35	32	83	C>A	AACCTTT	C02C2.5	Non-transcribed
CD0062a	polq-1	Cisplatin	50	I	1703976	C	CC/AC	1	AC/AC	2.9e-11	0	43	0	0	24	26	0	0	43	50	C>A	TTCCCAA	Y71G12B.13	Non-transcribed
CD0062a	polq-1	Cisplatin	50	V	11685660	A	AA/GG	0.8	AA/AG	0.19	19	0	0	0	0	0	2	0	19	2	T>C	TTTTAAG	No_gene	No_gene
CD0062a	polq-1	Cisplatin	50	V	11685665	T	TT/CC	0.8	TT/CT	0.19	0	0	0	20	0	2	0	0	20	2	T>C	AAATAGC	No_gene	No_gene
CD0062a	polq-1	Cisplatin	50	II	13210607	T	TT/GG	0.72	TT/GT	0.17	0	0	0	38	0	0	2	0	38	2	T>G	AAATTGT	F15D4.1	Non-transcribed
CD0062a	polq-1	Cisplatin	50	II	7654943	A	AA/CC	1	AC/CC	5.7e-11	42	0	0	0	0	64	0	0	42	64	T>G	GTTTTTA	No_gene	No_gene
CD0062c	polq-1	Cisplatin	50	IV	2704762	A	AA/AT	1	AT/AT	5.6e-11	42	0	0	0	13	0	0	23	42	36	T>A	TGATGAT	Y94H6A.6	Non-transcribed
CD0062c	polq-1	Cisplatin	50	IV	11484194	T	TT/CT	1	CT/CT	3.8e-12	0	0	0	46	0	13	0	11	46	24	T>C	TTTTCTT	H21P03.3	Transcribed
CD0062c	polq-1	Cisplatin	50	I	1452679	G	GG/GT	1	GT/GT	1.2e-08	0	0	34	0	0	0	37	52	34	89	C>A	AACCCAT	F47G6.4	Transcribed
CD0062c	polq-1	Cisplatin	50	II	9608203	C	CC/AC	1	AC/AC	5.9e-09	0	35	0	0	38	42	0	0	35	80	C>A	AGCCTTC	T15H9.6	Transcribed
CD0062c	polq-1	Cisplatin	50	II	8660152	T	TT/AT	1	AT/AT	6.1e-09	0	0	0	35	32	0	0	33	35	65	T>A	CAGTAGG	D2085.6	Transcribed
CD0062c	polq-1	Cisplatin	50	II	1839290	G	GG/GT	1	GT/GT	4.5e-08	0	0	32	0	0	0	40	38	32	78	C>A	AAACCCA	T08E11.1	Transcribed
CD0062c	polq-1	Cisplatin	50	II	7838833	C	CC/AC	1	AC/AC	5.5e-11	0	42	0	0	29	17	0	0	42	46	C>A	GAGCCCC	T09A5.18	Transcribed
CD0062c	polq-1	Cisplatin	50	V	6247484	G	GG/GT	1	GT/GT	1.7e-16	0	0	61	0	0	0	69	29	61	98	C>A	AACCTTT	K08B12.2	Transcribed
CD0062c	polq-1	Cisplatin	50	V	2132939	G	GG/GT	1	GT/GT	6.3e-07	0	0	28	0	0	0	7	17	28	24	C>A	GTGCCTG	F22F7.7	Non-transcribed
CD0062c	polq-1	Cisplatin	50	X	14129926	A	AA/AG	1	AG/AG	1.5e-11	44	0	0	0	29	0	46	0	44	75	T>C	TAATATT	F28H6.4	Transcribed
CD0062d	polq-1	Cisplatin	50	III	1665777	G	GG/AA	0.73	GG/AG	0.17	0	0	49	0	2	0	0	0	49	2	C>T	TCCCGAA	Y22D7AR.3	Non-transcribed
CD0062d	polq-1	Cisplatin	50	III	1665790	T	TT/GG	0.81	TT/GT	0.19	0	0	0	42	0	0	2	0	42	2	T>G	CCGTTGA	No_gene	No_gene
CD0062d	polq-1	Cisplatin	50	III	5791708	T	TT/GT	1	GT/GT	1.5e-11	0	0	0	44	0	0	17	16	44	33	T>G	ACATGTT	W03A3.2	Transcribed
CD0062d	polq-1	Cisplatin	50	I	2469341	A	AA/TT	0.8	AA/AT	0.19	27	0	0	0	0	0	0	2	27	2	T>A	AGCTATG	Y74C10AL.2	Non-transcribed
CD0062d	polq-1	Cisplatin	50	I	4120091	C	CC/AC	1	AC/AC	1e-14	0	55	0	0	22	14	0	0	55	36	C>A	AAGCAAA	No_gene	No_gene
CD0062d	polq-1	Cisplatin	50	IV	2309098	C	CC/AC	0.84	CC/CC	0.16	0	38	0	0	4	15	0	0	38	19	C>A	GGTCGGT	Y38F2AL.3	Transcribed
CD0062d	polq-1	Cisplatin	50	IV	12833415	A	AA/TT	1	AA/AT	8.8e-10	61	0	0	0	0	0	0	29	61	29	T>A	TCTTAAC	No_gene	No_gene
CD0062d	polq-1	Cisplatin	50	IV	8626943	C	CC/AA	1	AC/AA	2.1e-10	0	40	0	0	86	0	0	0	40	86	C>A	ACACATT	No_gene	No_gene
CD0062d	polq-1	Cisplatin	50	IV	416746	C	CC/CG	1	CG/CG	3.3e-16	0	60	0	0	0	11	36	0	60	47	C>G	CAGCAGC	T07A9.5	Transcribed
CD0062d	polq-1	Cisplatin	50	X	2063534	G	GG/TT	1	GG/GT	0.00059	0	0	24	0	0	0	3	42	24	45	C>A	ATACGGT	No_gene	No_gene
CD0063a	slx-1	Cisplatin	50	II	12033433	T	TT/CC	0.8	TT/CT	0.19	0	0	0	48	0	2	0	0	48	2	T>C	GATTTTT	Y17G7B.9	Transcribed
CD0063a	slx-1	Cisplatin	50	II	13522139	G	GG/CG	1	CG/CG	1.8e-05	0	0	23	0	0	22	21	0	23	43	C>G	ATTCTGG	F54F11.3	Transcribed
CD0063a	slx-1	Cisplatin	50	II	6478282	G	GG/GT	1	GT/GT	4.8e-15	0	0	56	0	0	0	17	27	56	44	C>A	GACCCTT	T28D9.7	Non-transcribed
CD0063a	slx-1	Cisplatin	50	X	111904	G	GG/TT	0.89	GG/GT	0.1	0	0	78	0	0	0	0	3	78	3	C>A	TGGCTTC	No_gene	No_gene
CD0063a	slx-1	Cisplatin	50	IV	16853894	G	GG/AG	1	AG/AG	7.6e-12	0	0	45	0	13	0	19	0	45	32	C>T	TCCCTCG	Y116A8A.9	Non-transcribed
CD0063a	slx-1	Cisplatin	50	V	10347743	A	AA/AT	1	AT/AT	3.8e-12	46	0	0	0	13	0	0	21	46	34	T>A	AAATGAC	K07C5.9	Non-transcribed
CD0063a	slx-1	Cisplatin	50	V	11145826	G	GG/GT	1	GG/TT	2.4e-07	0	0	40	0	0	0	3	19	40	22	C>A	AACCCTG	No_gene	No_gene
CD0063a	slx-1	Cisplatin	50	V	1989574	A	AA/AT	1	AT/AT	3.8e-12	46	0	0	0	29	0	1	11	46	41	T>A	TTCTCTG	T08B1.2	Non-transcribed
CD0063a	slx-1	Cisplatin	50	V	16960563	T	TT/CC	0.77	TT/CT	0.18	0	0	0	41	0	2	0	0	41	2	T>C	AAATTGC	Y102A5C.18	Transcribed
CD0063a	slx-1	Cisplatin	50	III	2695154	T	TT/CC	0.77	TT/CT	0.18	0	0	0	35	0	2	0	0	35	2	T>C	TTTTTTT	Y71H2AM.9	Transcribed
CD0063a	slx-1	Cisplatin	50	III	2829609	T	TT/CC	0.77	TT/CT	0.18	0	0	0	37	0	2	0	0	37	2	T>C	AATTTGA	Y71H2AM.1	Non-transcribed
CD0063c	slx-1	Cisplatin	50	II	10576915	C	CC/AC	1	AC/AC	1.1e-10	0	41	0	0	56	27	0	0	41	83	C>A	GACCTTT	C06A1.4	Transcribed
CD0063c	slx-1	Cisplatin	50	IV	11107858	A	AA/GG	1	AG/GG	7.5e-12	45	0	0	0	0	0	44	0	45	44	T>C	GTATTAT	No_gene	No_gene
CD0063c	slx-1	Cisplatin	50	IV	11107859	T	TT/AA	1	AT/AA	1.5e-11	0	0	0	44	45	0	0	0	44	45	T>A	TAATACA	No_gene	No_gene
CD0063c	slx-1	Cisplatin	50	III	10683230	G	GG/GT	1	GG/TT	3.3e-07	0	0	48	0	0	0	3	19	48	22	C>A	TTCCCGC	No_gene	No_gene
CD0063c	slx-1	Cisplatin	50	X	442163	G	GG/GT	0.94	GG/GG	0.059	0	0	37	0	0	0	13	4	37	17	C>A	AAACAAA	No_gene	No_gene
CD0063c	slx-1	Cisplatin	50	X	2922598	C	CC/AC	1	AC/AC	3.2e-09	0	36	0	0	42	23	0	0	36	65	C>A	AAGCTTT	F52B10.2	Transcribed
CD0063c	slx-1	Cisplatin	50	X	5247984	A	AA/AG	1	AG/AG	1.1e-10	41	0	0	0	26	0	16	0	41	42	T>C	TTTTTTG	No_gene	No_gene
CD0063c	slx-1	Cisplatin	50	V	20314354	T	TT/AT	1	AT/AT	2.2e-08	0	0	0	33	19	0	0	15	33	34	T>A	ACTTCTA	ZC15.2	Non-transcribed
CD0063c	slx-1	Cisplatin	50	V	18406974	G	GG/GT	1	GT/GT	9.4e-15	0	0	55	0	0	0	36	30	55	66	C>A	AACCCAA	ZK262.12	Transcribed
CD0063c	slx-1	Cisplatin	50	V	18431008	T	TT/CC	0.76	TT/CT	0.18	0	0	0	11	0	2	0	0	11	2	T>C	CTCTCTC	No_gene	No_gene
CD0063c	slx-1	Cisplatin	50	V	16929737	G	GG/GT	1	GT/GT	5.9e-09	0	0	35	0	0	0	25	32	35	57	C>A	ATCCCTG	Y102A5C.6	Transcribed
CD0063c	slx-1	Cisplatin	50	V	17089673	G	GG/AA	1	AG/AA	5.9e-09	0	0	35	0	66	0	0	0	35	66	C>T	TTGCTAA	T05E12.6	Non-transcribed
CD0063c	slx-1	Cisplatin	50	I	13045045	C	CC/CT	1	CT/CT	4.4e-08	0	32	0	0	0	26	0	18	32	44	C>T	CAGCTGG	W05B5.1	Non-transcribed
CD0063c	slx-1	Cisplatin	50	I	6215716	A	AA/AG	1	AG/AG	2.8e-11	43	0	0	0	15	0	8	0	43	23	T>C	ATTTATT	T08B2.15	Transcribed
CD0063c	slx-1	Cisplatin	50	I	7002870	G	GG/GT	1	GT/GT	1.5e-09	0	0	37	0	0	0	53	26	37	79	C>A	TCCCTGA	H06O01.4	Non-transcribed
CD0063c	slx-1	Cisplatin	50	I	7392176	G	GG/CG	1	CG/CG	4.1e-10	0	0	39	0	0	8	26	0	39	34	C>G	GAGCAAA	C15A11.3	Non-transcribed
CD0063d	slx-1	Cisplatin	50	X	3817321	G	GG/GT	1	GT/GT	1.4e-13	0	0	51	0	0	0	21	22	51	43	C>A	TAGCCTC	No_gene	No_gene
CD0063d	slx-1	Cisplatin	50	II	10147306	C	CC/AC	1	AC/AC	1.1e-10	0	41	0	0	21	31	0	0	41	52	C>A	CCCCTTC	F27E5.2	Non-transcribed
CD0063d	slx-1	Cisplatin	50	II	1233635	C	CC/AC	1	AC/AC	6.5e-07	0	28	0	0	6	13	0	0	28	19	C>A	TCCCAAA	No_gene	No_gene
CD0063d	slx-1	Cisplatin	50	II	3853100	G	GG/AG	1	AG/AG	3e-09	0	0	36	0	26	0	15	0	36	41	C>T	CCCCCAG	C17A2.1	Transcribed
CD0063d	slx-1	Cisplatin	50	II	6637832	C	CC/AC	1	AC/AC	1.3e-15	0	58	0	0	14	19	0	0	58	33	C>A	CACCTTC	T19D12.6	Transcribed
CD0063d	slx-1	Cisplatin	50	II	6637833	T	TT/CT	1	CT/CT	6.6e-16	0	0	0	59	0	14	0	19	59	33	T>C	ACCTTCT	T19D12.6	Transcribed
CD0063d	slx-1	Cisplatin	50	II	12019548	A	AA/TT	0.78	AA/AT	0.18	53	0	0	0	0	0	0	2	53	2	T>A	CGTTGTT	Y17G7B.6	Transcribed
CD0063d	slx-1	Cisplatin	50	IV	4929983	T	TT/AT	1	AT/AT	1.4e-13	0	0	0	51	17	0	0	16	51	33	T>A	AACTCAG	Y9C9A.8	Non-transcribed
CD0063d	slx-1	Cisplatin	50	IV	5002323	C	CC/AC	1	AC/AC	5.5e-11	0	42	0	0	23	28	0	0	42	51	C>A	TTCCCAG	No_gene	No_gene
CD0063d	slx-1	Cisplatin	50	IV	3588780	C	CC/AC	1	AC/AC	4.4e-08	0	32	0	0	11	9	0	0	32	20	C>A	AGCCTGA	Y37E11B.4	Transcribed
CD0064a	xpf-1	Cisplatin	50	X	4617807	C	CC/AC	1	AC/AC	5.5e-11	0	42	0	0	34	46	0	0	42	80	C>A	ATCCGTT	T13H2.4	Transcribed
CD0064a	xpf-1	Cisplatin	50	X	4722570	C	CC/AC	1	AC/AC	3.1e-18	0	67	0	0	19	30	0	0	67	49	C>A	TTCCACG	No_gene	No_gene
CD0064a	xpf-1	Cisplatin	50	X	637244	G	GG/GT	1	GT/GT	4e-12	0	0	46	0	0	0	37	26	46	63	C>A	GCTCCTT	No_gene	No_gene
CD0064a	xpf-1	Cisplatin	50	X	7091415	C	CC/AC	1	AC/AC	1e-12	0	48	0	0	50	24	0	0	48	74	C>A	TTCCAAT	C36B7.5	Transcribed
CD0064a	xpf-1	Cisplatin	50	X	14498733	T	TT/CT	1	CT/CT	3e-09	0	0	0	36	0	14	0	11	36	25	T>C	CTCTTTT	M163.2	Non-transcribed
CD0064a	xpf-1	Cisplatin	50	V	1344343	C	CC/CT	1	CT/CT	1.1e-10	0	41	0	0	0	19	0	29	41	48	C>T	GAGCCTA	No_gene	No_gene
CD0064a	xpf-1	Cisplatin	50	V	16737368	G	GG/GT	1	GT/GT	5.1e-13	0	0	49	0	0	0	16	63	49	79	C>A	TCCCCGC	T25E12.8	Transcribed
CD0064a	xpf-1	Cisplatin	50	V	13664021	A	AA/AG	1	AG/AG	7.7e-12	45	0	0	0	22	1	16	0	45	39	T>C	AGGTTAC	F58G11.1	Transcribed
CD0064a	xpf-1	Cisplatin	50	V	13829633	C	CC/AC	1	AC/AC	3.8e-12	0	46	0	0	49	30	0	0	46	79	C>A	TCACTAG	F55B12.5	Non-transcribed
CD0064a	xpf-1	Cisplatin	50	V	13829635	A	AA/AG	1	AG/AG	2.7e-13	50	0	0	0	31	0	48	0	50	79	T>C	TGCTAGT	F55B12.5	Transcribed
CD0064a	xpf-1	Cisplatin	50	V	20170398	C	CC/AC	1	AC/AC	6e-09	0	35	0	0	17	29	0	0	35	46	C>A	GCCCACT	F19B2.3	Transcribed
CD0064a	xpf-1	Cisplatin	50	III	4600784	C	CC/AC	1	AC/AC	2.7e-12	0	46	0	1	45	28	0	0	47	73	C>A	GTCCAAC	F10F2.1	Transcribed
CD0064a	xpf-1	Cisplatin	50	III	4600785	A	AA/AC	1	AC/AC	2e-12	47	0	0	0	28	45	0	0	47	73	T>G	TGTTGGA	F10F2.1	Non-transcribed
CD0064a	xpf-1	Cisplatin	50	III	2468038	C	CC/CG	1	CG/CG	1.9e-14	0	54	0	0	0	28	21	0	54	49	C>G	CCTCCTT	E02H9.9	Transcribed
CD0064a	xpf-1	Cisplatin	50	III	2667646	C	CC/AC	1	AC/AC	1.2e-06	0	27	0	0	40	29	0	0	27	69	C>A	CTCCCTG	H19M22.2	Non-transcribed
CD0064a	xpf-1	Cisplatin	50	III	2667647	C	CC/AC	1	AC/AC	6.3e-07	0	28	0	0	40	28	0	0	28	68	C>A	TCCCTGG	H19M22.2	Non-transcribed
CD0064a	xpf-1	Cisplatin	50	III	9811817	G	GG/AG	1	AG/AG	9.4e-15	0	0	55	0	26	0	27	0	55	53	C>T	TTTCGGA	ZK632.5	Transcribed
CD0064a	xpf-1	Cisplatin	50	III	3346814	T	TT/AT	1	AT/AT	1.5e-11	0	0	0	44	23	0	0	23	44	46	T>A	TCGTCTT	F45H7.2	Non-transcribed
CD0064a	xpf-1	Cisplatin	50	III	216865	C	CC/AC	1	AC/AC	4.1e-10	0	39	0	0	27	31	0	0	39	58	C>A	TGCCGAT	No_gene	No_gene
CD0064a	xpf-1	Cisplatin	50	III	216866	G	GG/CG	1	CG/CG	8e-10	0	0	38	0	0	27	30	0	38	57	C>G	AATCGGC	No_gene	No_gene
CD0064a	xpf-1	Cisplatin	50	III	7354843	C	CC/AC	1	AC/AC	8.6e-08	0	31	0	0	29	21	0	1	31	51	C>A	TACCTTC	F08F8.10	Transcribed
CD0064a	xpf-1	Cisplatin	50	III	7354844	T	TT/CT	1	CT/CT	2.3e-08	0	0	0	33	0	30	0	22	33	52	T>C	ACCTTCG	F08F8.10	Transcribed
CD0064a	xpf-1	Cisplatin	50	III	5548611	T	TT/AT	1	AT/AT	2.8e-11	0	0	0	43	34	0	0	26	43	60	T>A	ACCTCAA	F09F7.5	Non-transcribed
CD0064a	xpf-1	Cisplatin	50	III	5879293	T	TT/AT	1	AT/AT	5.5e-11	0	0	0	42	24	0	0	13	42	37	T>A	TATTATC	F01F1.2	Non-transcribed
CD0064a	xpf-1	Cisplatin	50	I	14351194	A	AA/AG	1	AA/AA	9.1e-05	27	0	0	0	12	0	4	0	27	16	T>C	AAATAAA	Y105E8A.2	Non-transcribed
CD0064a	xpf-1	Cisplatin	50	I	10823447	T	TT/AT	1	AT/AT	1.7e-16	0	0	0	61	39	0	0	31	61	70	T>A	CTCTCGT	C35E7.5	Non-transcribed
CD0064a	xpf-1	Cisplatin	50	I	1875745	T	TT/CT	1	CT/CT	3.7e-14	0	0	0	53	0	28	0	28	53	56	T>C	CCATGGT	Y71G12A.3	Non-transcribed
CD0064a	xpf-1	Cisplatin	50	I	2409483	C	CC/AC	1	AC/AC	3.4e-07	0	29	0	0	42	42	0	0	29	84	C>A	ATCCTTC	Y39G10AR.2	Non-transcribed
CD0064a	xpf-1	Cisplatin	50	I	5947317	G	GG/GT	1	GT/GT	1.4e-13	0	0	51	0	0	0	29	24	51	53	C>A	AAGCCGG	B0207.7	Non-transcribed
CD0064a	xpf-1	Cisplatin	50	I	6609386	C	CC/AC	1	AC/AC	5.1e-13	0	49	0	0	29	33	0	0	49	62	C>A	AAACCCT	No_gene	No_gene
CD0064a	xpf-1	Cisplatin	50	I	928180	G	GG/GT	1	GT/GT	1.2e-06	0	0	27	0	0	0	33	10	27	43	C>A	CATCTCC	No_gene	No_gene
CD0064a	xpf-1	Cisplatin	50	I	1032728	C	CC/AC	0.99	CC/CC	0.0067	0	27	0	0	4	11	0	0	27	15	C>A	CCGCCGA	Y34D9A.4	Transcribed
CD0064a	xpf-1	Cisplatin	50	I	11872946	G	GG/GT	1	GT/GT	8.5e-08	0	0	31	0	0	0	16	18	31	34	C>A	CACCTCG	No_gene	No_gene
CD0064a	xpf-1	Cisplatin	50	I	4782281	C	CC/TT	1	CT/TT	1.4e-11	0	44	0	0	0	0	0	40	44	40	C>T	AATCATG	No_gene	No_gene
CD0064a	xpf-1	Cisplatin	50	I	8377505	C	CC/CT	1	CT/CT	8e-10	0	38	0	0	0	17	0	8	38	25	C>T	AAGCTTT	F16D3.6	Non-transcribed
CD0064a	xpf-1	Cisplatin	50	I	8776901	G	GG/GT	1	GT/GT	3.6e-14	0	0	53	0	0	0	14	11	53	25	C>A	CTCCCTG	DY3.5	Non-transcribed
CD0064a	xpf-1	Cisplatin	50	IV	15750526	T	TT/AT	1	AT/AT	5.5e-11	0	0	0	42	26	0	0	7	42	33	T>A	AACTCTC	No_gene	No_gene
CD0064a	xpf-1	Cisplatin	50	IV	16128886	T	TT/AT	1	AT/AT	1.2e-17	0	0	0	65	10	0	0	17	65	27	T>A	ATTTCCC	No_gene	No_gene
CD0064a	xpf-1	Cisplatin	50	IV	16128887	C	CC/AC	1	CC/CC	2.8e-17	0	64	0	0	10	19	0	0	64	29	C>A	TTTCCCT	No_gene	No_gene
CD0064a	xpf-1	Cisplatin	50	IV	14832018	A	AA/AC	1	AA/AA	1.1e-09	39	0	0	0	20	5	0	0	39	25	T>G	ATATTAG	No_gene	No_gene
CD0064a	xpf-1	Cisplatin	50	IV	11851613	C	CC/AC	1	AC/AC	5.6e-11	0	42	0	0	22	30	0	0	42	52	C>A	CACCATA	F38H4.7	Transcribed
CD0064a	xpf-1	Cisplatin	50	IV	11851614	A	AA/AC	1	AC/AC	5.5e-11	42	0	0	0	30	21	0	0	42	51	T>G	TTATGGT	F38H4.7	Non-transcribed
CD0064a	xpf-1	Cisplatin	50	IV	716536	C	CC/CG	1	CG/CG	4.4e-08	0	32	0	0	0	16	46	0	32	62	C>G	CAACAGG	No_gene	No_gene
CD0064a	xpf-1	Cisplatin	50	IV	716538	G	GG/GT	1	GT/GT	1.2e-08	0	0	34	0	0	0	15	43	34	58	C>A	CACCTGT	No_gene	No_gene
CD0064a	xpf-1	Cisplatin	50	IV	1099098	C	CC/CT	1	CT/CT	1e-12	0	48	0	0	0	18	0	31	48	49	C>T	ACTCAAA	Y55F3AR.1	Non-transcribed
CD0064a	xpf-1	Cisplatin	50	IV	2691570	T	TT/AT	1	AT/AT	1.2e-08	0	0	0	34	17	0	0	22	34	39	T>A	GGCTAAT	Y94H6A.5	Transcribed
CD0064a	xpf-1	Cisplatin	50	IV	2834066	G	GG/GT	1	GT/GT	1.5e-11	0	0	44	0	0	0	19	31	44	50	C>A	AGGCTCG	No_gene	No_gene
CD0064a	xpf-1	Cisplatin	50	IV	5003134	A	AA/AG	1	AG/AG	5.9e-09	35	0	0	0	39	0	37	0	35	76	T>C	ACCTACT	T28H11.4	Transcribed
CD0064a	xpf-1	Cisplatin	50	IV	5003135	G	GG/GT	1	GT/GT	5.9e-09	0	0	35	0	0	0	39	37	35	76	C>A	CACCTAC	T28H11.4	Transcribed
CD0064a	xpf-1	Cisplatin	50	IV	6225369	T	TT/GT	1	GT/GT	2.2e-19	0	0	0	71	0	0	28	28	71	56	T>G	CAATGGT	No_gene	No_gene
CD0064a	xpf-1	Cisplatin	50	IV	6225370	G	GG/GT	1	GT/GT	3.7e-19	1	0	70	0	0	0	28	28	71	56	C>A	AACCATT	No_gene	No_gene
CD0064a	xpf-1	Cisplatin	50	IV	8153833	C	CC/AC	1	AC/AC	5.2e-13	0	49	0	0	32	39	0	0	49	71	C>A	TTCCATT	B0218.2	Non-transcribed
CD0064a	xpf-1	Cisplatin	50	IV	4165100	T	TT/GT	1	GT/GT	6.3e-07	0	0	0	28	0	0	24	41	28	65	T>G	TGATGGT	K08D10.7	Non-transcribed
CD0064a	xpf-1	Cisplatin	50	IV	4165101	G	GG/GT	1	GT/GT	6.3e-07	0	0	28	0	0	0	41	24	28	65	C>A	AACCATC	K08D10.7	Transcribed
CD0064a	xpf-1	Cisplatin	50	IV	4274375	G	GG/GT	1	GT/GT	1.9e-14	0	0	54	0	0	0	66	36	54	102	C>A	GATCTCC	F36A4.14	Non-transcribed
CD0064a	xpf-1	Cisplatin	50	II	12824450	G	GG/GT	1	GT/GT	1.1e-10	0	0	41	0	0	0	28	68	41	96	C>A	AGCCTAA	No_gene	No_gene
CD0064a	xpf-1	Cisplatin	50	II	10768325	T	TT/CT	1	TT/CC	1.7e-07	0	0	0	39	0	46	0	6	39	52	T>C	TGCTGGC	C52A11.4	Transcribed
CD0064a	xpf-1	Cisplatin	50	II	615828	G	GG/CG	1	CG/CG	3e-09	0	0	36	0	0	38	53	1	36	92	C>G	GCTCTGT	T04B8.5	Non-transcribed
CD0064a	xpf-1	Cisplatin	50	II	2947650	C	CC/AC	1	AC/AC	8e-10	0	38	0	0	44	14	1	0	38	59	C>A	TGTCTGG	T11F1.5	Non-transcribed
CD0064a	xpf-1	Cisplatin	50	II	2947651	T	TT/GT	1	GT/GT	8e-10	0	0	0	38	0	0	41	15	38	56	T>G	GTCTGGG	T11F1.5	Non-transcribed
CD0064a	xpf-1	Cisplatin	50	II	2947652	G	GG/GT	1	GT/GT	1.6e-09	0	0	37	0	0	0	16	41	37	57	C>A	ACCCAGA	T11F1.5	Transcribed
CD0064a	xpf-1	Cisplatin	50	II	3265924	C	CC/CT	1	CT/CT	1.2e-08	0	34	0	0	0	32	0	8	34	40	C>T	TCCCATC	No_gene	No_gene
CD0064a	xpf-1	Cisplatin	50	II	3273009	G	GG/GT	1	GT/GT	2.8e-11	0	0	43	0	0	0	16	46	43	62	C>A	GTCCTCG	F02E11.3	Non-transcribed
CD0064a	xpf-1	Cisplatin	50	II	1858523	A	AA/AT	1	AT/AT	5.5e-11	42	0	0	0	8	0	0	40	42	48	T>A	AAGTTTT	No_gene	No_gene
CD0064a	xpf-1	Cisplatin	50	II	2280710	C	CC/CT	1	CT/CT	5.9e-09	0	35	0	0	0	6	0	34	35	40	C>T	GTTCGGC	K09F6.9	Transcribed
CD0064c	xpf-1	Cisplatin	50	X	17187121	C	CC/CT	1	CT/CT	1.6e-09	0	37	0	0	0	7	0	39	37	46	C>T	TTGCTGT	B0302.1	Non-transcribed
CD0064c	xpf-1	Cisplatin	50	X	17451386	C	CC/AC	1	AC/AC	1.4e-13	0	51	0	0	68	9	0	0	51	77	C>A	CTCCTCT	No_gene	No_gene
CD0064c	xpf-1	Cisplatin	50	X	17451387	T	TT/AT	1	TT/AA	9e-11	0	0	0	47	68	0	0	8	47	76	T>A	TCCTCTG	No_gene	No_gene
CD0064c	xpf-1	Cisplatin	50	X	8201394	G	GG/AA	1	AG/AA	1.2e-08	0	0	34	0	36	0	0	0	34	36	C>T	CCCCCCC	C17H11.6	Non-transcribed
CD0064c	xpf-1	Cisplatin	50	X	2009226	A	AA/TT	0.8	AA/AT	0.19	26	0	0	0	0	0	0	2	26	2	T>A	AAATAAA	No_gene	No_gene
CD0064c	xpf-1	Cisplatin	50	I	1541529	C	CC/AC	1	AC/AC	2.8e-11	0	43	0	0	23	15	0	0	43	38	C>A	CAACTGA	No_gene	No_gene
CD0064c	xpf-1	Cisplatin	50	I	2356370	C	CC/AC	1	AC/AC	2.1e-10	0	40	0	0	33	20	0	0	40	53	C>A	CTTCCCG	No_gene	No_gene
CD0064c	xpf-1	Cisplatin	50	I	7969664	G	GG/AG	1	AG/AG	3.1e-09	0	0	36	0	10	0	18	0	36	28	C>T	TTTCTTT	T22C1.10	Transcribed
CD0064c	xpf-1	Cisplatin	50	I	38570	T	TT/AT	1	AT/AT	4.1e-10	0	0	0	39	38	0	0	29	39	67	T>A	ACGTCCC	No_gene	No_gene
CD0064c	xpf-1	Cisplatin	50	IV	1687951	G	GG/CG	1	CG/CG	3.9e-12	0	0	46	0	0	9	21	0	46	30	C>G	CCCCTCT	No_gene	No_gene
CD0064c	xpf-1	Cisplatin	50	IV	2014383	G	GG/GT	1	GT/GT	3e-09	0	0	36	0	0	0	30	15	36	45	C>A	AACCTAA	Y76B12C.7	Non-transcribed
CD0064c	xpf-1	Cisplatin	50	III	2082426	G	GG/GT	1	GT/GT	8.7e-17	0	0	62	0	0	0	38	41	62	79	C>A	TACCTAG	No_gene	No_gene
CD0064c	xpf-1	Cisplatin	50	III	3115561	C	CC/GG	1	CG/GG	5.4e-13	0	49	0	0	0	0	43	0	49	43	C>G	CAACGGT	Y53G8B.4	Transcribed
CD0064c	xpf-1	Cisplatin	50	III	3115562	G	GG/TT	1	GG/GT	1.8e-13	0	0	51	0	0	0	0	41	51	41	C>A	CACCGTT	Y53G8B.4	Non-transcribed
CD0064c	xpf-1	Cisplatin	50	III	11488067	G	GG/GT	0.92	GG/GG	0.085	0	0	43	0	0	0	15	4	43	19	C>A	TTTCCAA	No_gene	No_gene
CD0064c	xpf-1	Cisplatin	50	III	7713194	C	CC/CT	1	CT/CT	2.1e-10	0	40	0	0	0	35	0	33	40	68	C>T	GGTCAGA	C03B8.3	Non-transcribed
CD0064c	xpf-1	Cisplatin	50	III	910162	A	AA/AG	1	AG/AG	1.6e-09	37	0	0	0	20	0	35	0	37	55	T>C	ACCTCTT	F23H11.5	Non-transcribed
CD0064c	xpf-1	Cisplatin	50	III	910163	G	GG/GT	1	GT/GT	5.9e-09	0	0	35	0	0	0	21	32	35	53	C>A	AACCTCT	F23H11.5	Non-transcribed
CD0064c	xpf-1	Cisplatin	50	III	9958902	G	GG/TT	1	GT/TT	7.5e-12	0	0	45	0	0	0	0	49	45	49	C>A	GACCCTA	R10E12.1	Transcribed
CD0064c	xpf-1	Cisplatin	50	III	6333764	T	TT/CC	1	CT/CC	2.8e-11	0	0	0	43	0	61	0	0	43	61	T>C	CTCTACA	C56G2.4	Non-transcribed
CD0064c	xpf-1	Cisplatin	50	II	8906722	A	AA/AG	1	AG/AG	7.7e-12	45	0	0	0	17	0	82	0	45	99	T>C	ATGTCTC	B0457.1	Transcribed
CD0064c	xpf-1	Cisplatin	50	II	3329797	C	CC/AC	1	AC/AC	2e-12	0	47	0	0	19	30	0	0	47	49	C>A	CTCCTAT	F14D2.6	Non-transcribed
CD0064c	xpf-1	Cisplatin	50	II	10183122	C	CC/CT	0.96	CC/TT	0.045	0	55	0	0	0	4	0	45	55	49	C>T	AAACTTT	No_gene	No_gene
CD0064c	xpf-1	Cisplatin	50	II	1673515	T	TT/AT	1	AT/AT	2.8e-11	0	0	0	43	52	0	0	25	43	77	T>A	TAATATA	F58E1.6	Non-transcribed
CD0064c	xpf-1	Cisplatin	50	V	20905949	A	AA/AT	1	AT/AT	1.2e-08	34	0	0	0	35	0	0	64	34	99	T>A	GTTTCTA	F25C8.4	Transcribed
CD0064c	xpf-1	Cisplatin	50	V	6149426	C	CC/AC	1	AC/AC	1.4e-11	0	44	0	0	24	25	0	0	44	49	C>A	AACCTTG	W06H8.8	Transcribed
CD0064c	xpf-1	Cisplatin	50	V	10217776	T	TT/GT	1	GT/GT	6.5e-16	0	0	0	59	0	0	35	37	59	72	T>G	GTGTGGA	ZK856.14	Non-transcribed
CD0064c	xpf-1	Cisplatin	50	V	10217777	G	GG/GT	1	GT/GT	1.3e-15	0	0	58	0	0	0	37	36	58	73	C>A	CTCCACA	ZK856.14	Transcribed
CD0064c	xpf-1	Cisplatin	50	V	19758628	T	TT/GT	1	GT/GT	2e-12	0	0	0	47	0	0	34	10	47	44	T>G	AGCTCAG	No_gene	No_gene
CD0064c	xpf-1	Cisplatin	50	V	18746029	A	AA/AG	1	AG/AG	7e-14	52	0	0	0	35	0	61	0	52	96	T>C	GTCTACG	No_gene	No_gene
CD0064c	xpf-1	Cisplatin	50	V	18746030	G	GG/GT	1	GT/GT	1.9e-14	0	0	54	0	0	0	34	61	54	95	C>A	TGTCTAC	No_gene	No_gene
CD0064c	xpf-1	Cisplatin	50	V	16418959	G	GG/GT	1	GT/GT	2e-12	0	0	47	0	0	0	35	49	47	84	C>A	GACCTCT	F26D2.16	Non-transcribed
CD0064d	xpf-1	Cisplatin	50	II	15255160	G	GG/AG	1	AG/AG	8.6e-08	0	0	31	0	6	0	11	0	31	17	C>T	TAGCCTA	No_gene	No_gene
CD0064d	xpf-1	Cisplatin	50	II	15255200	A	AA/AG	1	AG/AG	6e-09	35	0	0	0	9	0	10	0	35	19	T>C	AAGTCTA	No_gene	No_gene
CD0064d	xpf-1	Cisplatin	50	II	15255207	C	CC/CT	1	CT/CT	1.2e-08	0	34	0	0	1	9	0	17	34	27	C>T	AGGCTTA	No_gene	No_gene
CD0064d	xpf-1	Cisplatin	50	II	15255212	G	GG/AG	1	AG/AG	4.4e-08	0	0	32	0	22	0	9	0	32	31	C>T	AAGCCTA	No_gene	No_gene
CD0064d	xpf-1	Cisplatin	50	II	15255213	C	CC/CT	1	CT/CT	8.6e-08	0	31	0	0	0	9	0	22	31	31	C>T	AGGCTTA	No_gene	No_gene
CD0064d	xpf-1	Cisplatin	50	II	226754	C	CC/AC	1	AC/AC	1.6e-09	0	37	0	0	28	34	0	0	37	62	C>A	AACCGCT	Y43H11AL.1	Transcribed
CD0064d	xpf-1	Cisplatin	50	II	226755	G	GG/CG	1	CG/CG	4.1e-10	0	0	39	0	0	28	33	0	39	61	C>G	CAGCGGT	Y43H11AL.1	Non-transcribed
CD0064d	xpf-1	Cisplatin	50	II	10815457	T	TT/GT	1	TT/TT	0.00099	0	0	1	35	0	0	9	34	36	43	T>G	AGGTGTT	R06F6.8	Transcribed
CD0064d	xpf-1	Cisplatin	50	II	13688591	A	AA/AT	1	AA/TT	0.00027	46	0	0	0	2	0	0	13	46	15	T>A	GTCTTTT	Y48E1A.1	Non-transcribed
CD0064d	xpf-1	Cisplatin	50	IV	14243343	C	CC/CT	1	CT/CT	1.1e-10	0	41	0	0	0	44	0	12	41	56	C>T	AATCTAA	Y64G10A.2	Transcribed
CD0064d	xpf-1	Cisplatin	50	IV	14673810	C	CC/AC	1	AC/AC	1e-12	0	48	0	0	48	8	0	0	48	56	C>A	ATCCTCG	Y57G11C.37	Non-transcribed
CD0064d	xpf-1	Cisplatin	50	IV	5494752	C	CC/AC	1	CC/AA	4.9e-09	0	38	0	0	79	8	0	0	38	87	C>A	ATCCTCA	B0273.1	Non-transcribed
CD0064d	xpf-1	Cisplatin	50	IV	6162595	C	CC/AC	1	AC/AC	7.5e-12	0	45	0	0	58	11	0	0	45	69	C>A	ATCCAAT	C11D2.6	Transcribed
CD0064d	xpf-1	Cisplatin	50	IV	1904743	A	AA/AT	1	AA/TT	0.0012	37	0	0	0	6	0	0	60	37	66	T>A	GCTTTAC	F55A8.1	Transcribed
CD0064d	xpf-1	Cisplatin	50	IV	56115	C	CC/AC	1	AC/AC	2.8e-11	0	43	0	0	31	21	0	0	43	52	C>A	ATCCCAG	No_gene	No_gene
CD0064d	xpf-1	Cisplatin	50	IV	802428	C	CC/AC	1	AC/AC	1.1e-10	0	41	0	0	25	15	0	0	41	40	C>A	TCCCGTC	Y55F3BL.1	Non-transcribed
CD0064d	xpf-1	Cisplatin	50	IV	802429	G	GG/AG	1	AG/AG	5.5e-11	0	0	42	0	25	0	15	0	42	40	C>T	CGACGGG	Y55F3BL.1	Transcribed
CD0064d	xpf-1	Cisplatin	50	IV	10020417	C	CC/AC	1	CC/AA	0.0004	0	38	0	0	39	4	0	0	38	43	C>A	TAACTTC	F44D12.9	Non-transcribed
CD0064d	xpf-1	Cisplatin	50	III	9848918	T	TT/CC	1	TT/CT	2.6e-07	0	0	0	38	0	44	0	2	38	46	T>C	TCTTCTG	No_gene	No_gene
CD0064d	xpf-1	Cisplatin	50	III	9848942	G	GG/CC	0.97	GG/CG	0.028	0	0	37	0	0	31	2	1	37	34	C>G	GAACTGA	No_gene	No_gene
CD0064d	xpf-1	Cisplatin	50	V	18489727	T	TT/AA	0.69	TT/AT	0.16	0	0	0	52	2	0	0	0	52	2	T>A	ATATCCA	No_gene	No_gene
CD0064d	xpf-1	Cisplatin	50	V	13069040	A	AA/CC	1	AC/CC	4.1e-10	39	0	0	0	2	67	0	0	39	69	T>G	TGGTGGT	C34B4.3	Non-transcribed
CD0064d	xpf-1	Cisplatin	50	V	15888032	C	CC/AA	1	AC/AA	2.7e-13	0	50	0	0	93	2	0	0	50	95	C>A	CGCCATA	T06C12.10	Transcribed
CD0064d	xpf-1	Cisplatin	50	V	15888033	A	AA/CC	1	AC/CC	2.6e-13	50	0	0	0	1	94	0	0	50	95	T>G	ATATGGC	T06C12.10	Non-transcribed
CD0064d	xpf-1	Cisplatin	50	V	2255968	G	GG/GT	1	GT/GT	4.9e-15	0	0	56	0	0	0	16	55	56	71	C>A	ATCCTTT	F41B5.1	Transcribed
CD0064d	xpf-1	Cisplatin	50	V	8428643	G	GG/TT	1	GG/GT	0.0015	0	0	39	0	0	0	0	9	39	9	C>A	GTTCAAC	F52E1.13	Non-transcribed
CD0064d	xpf-1	Cisplatin	50	V	8455595	C	CC/AA	1	AC/AA	1e-12	0	48	0	0	80	1	1	0	48	82	C>A	TTCCGGT	T23B12.11	Non-transcribed
CD0064d	xpf-1	Cisplatin	50	V	8455596	G	GG/TT	1	GT/TT	5.7e-13	0	0	49	0	0	0	2	79	49	81	C>A	AACCGGA	T23B12.11	Transcribed
CD0064d	xpf-1	Cisplatin	50	V	8604441	T	TT/AA	1	AT/AA	2.1e-10	0	0	0	40	93	0	0	0	40	93	T>A	AAATCGA	F41E6.5	Non-transcribed
CD0064d	xpf-1	Cisplatin	50	V	6120413	A	AA/GG	1	AA/AG	6.6e-13	66	0	0	0	1	0	50	0	66	51	T>C	ACCTCTG	No_gene	No_gene
CD0064d	xpf-1	Cisplatin	50	V	6120414	G	GG/TT	1	GG/GT	1.3e-10	0	0	66	0	0	0	1	45	66	46	C>A	CACCTCT	No_gene	No_gene
CD0064d	xpf-1	Cisplatin	50	V	7228451	G	GG/TT	1	GT/TT	1.5e-11	0	0	44	0	0	0	0	56	44	56	C>A	CACCTTC	C05C8.4	Non-transcribed
CD0064d	xpf-1	Cisplatin	50	V	4349753	G	GG/GT	1	GT/GT	2.1e-10	0	0	40	0	0	0	16	31	40	47	C>A	TTCCATA	F32D1.10	Transcribed
CD0064d	xpf-1	Cisplatin	50	V	3745583	T	TT/GT	1	TT/TT	0.0026	0	0	0	41	0	0	9	29	41	38	T>G	AGGTGGA	Y39H10A.3	Non-transcribed
CD0064d	xpf-1	Cisplatin	50	I	9186317	C	CC/AA	0.99	CC/AC	0.013	0	40	0	0	6	0	0	0	40	6	C>A	TAACTAT	F25H5.1	Transcribed
CD0064d	xpf-1	Cisplatin	50	I	6319950	C	CC/AC	1	AC/AC	2.2e-08	0	33	0	0	14	51	0	0	33	65	C>A	CTGCTTG	F26B1.2	Non-transcribed
CD0064d	xpf-1	Cisplatin	50	I	11236831	T	TT/AA	1	AT/AA	1.1e-10	0	0	0	41	79	0	0	0	41	79	T>A	TTCTATG	No_gene	No_gene
CD0064d	xpf-1	Cisplatin	50	X	17590175	T	TT/GG	1	TT/GT	2.8e-07	0	0	0	64	0	0	21	0	64	21	T>G	CCCTTTT	No_gene	No_gene
CD0064d	xpf-1	Cisplatin	50	X	40984	A	AA/AG	1	AG/AG	2.7e-13	50	0	0	0	52	0	16	0	50	68	T>C	TCCTTTG	Y73B3A.21	Transcribed
CD0064d	xpf-1	Cisplatin	50	X	40985	G	GG/GT	1	GT/GT	1.4e-13	0	0	51	0	0	0	52	16	51	68	C>A	ATCCTTT	Y73B3A.21	Transcribed
CD0064d	xpf-1	Cisplatin	50	X	735482	G	GG/GT	1	GT/GT	7.4e-12	0	0	45	0	0	0	79	29	45	108	C>A	CACCTCA	C02H7.2	Non-transcribed
CD0064d	xpf-1	Cisplatin	50	X	14782913	T	TT/CC	1	TT/CT	0.0032	0	0	0	53	0	8	0	0	53	8	T>C	TTTTGCC	Y16B4A.1	Non-transcribed
CD0064d	xpf-1	Cisplatin	50	X	11759208	T	TT/CT	0.95	CT/CT	0.049	0	1	0	24	0	11	0	29	25	40	T>C	CGCTCCT	C40H5.4	Non-transcribed
CD0064d	xpf-1	Cisplatin	50	X	2645941	G	GG/GT	1	GT/GT	2.7e-13	0	0	50	0	0	0	27	27	50	54	C>A	TTCCTTC	F54G2.1	Non-transcribed
CD0064d	xpf-1	Cisplatin	50	X	1206838	G	GG/AG	1	AG/AG	2.8e-11	0	0	43	0	14	0	33	0	43	47	C>T	AAGCTGG	No_gene	No_gene
CD0064d	xpf-1	Cisplatin	50	X	1206839	C	CC/AC	1	AC/AC	1.1e-10	0	41	0	0	16	32	0	0	41	48	C>A	CAGCTTA	No_gene	No_gene
CD0064d	xpf-1	Cisplatin	50	X	1206840	T	TT/AT	1	AT/AT	5.6e-11	0	0	0	42	16	0	0	34	42	50	T>A	AGCTTAG	No_gene	No_gene

## Sheet: Supplementary table 4
Supplementary table 4. Indels identified in the study.
Sample	Genotype	Drug	Concentration	Type	Chr	Start	Range.start	Range.end	Length	Change	REPEATS	CONTEXT	GENE_FOOTPRINT	STRAND_GENE
CD0001c	N2	None	0	D	II	8135042	8135041	8135048	1	t	1	ATTATTTTTTGAAT	C41C4.7	-
CD0001c	N2	None	0	D	III	1201674	1201673	1201679	1	g	1	AATCGGGGGTTTT	Y119D3B.16	-
CD0001c	N2	None	0	D	V	8221210	8221209	8221268	58	ctgcg<48>tcgca	1	AATTCTGCGAAAAAAATCGCAGAACTCAGTGGAATAGAAAATGCAGAATTGATTTATTCGCAACGT	K07C11.9	-
CD0002a	ung-1	None	0	D	I	13942121	13942120	13942128	6	actgct	1	CCCAACTGCTATTGG	No_gene	No_gene
CD0002a	ung-1	None	0	D	X	8144693	8144692	8144697	3	acc	1	GTGGACCAAAGA	C02B8.2	+
CD0002d	ung-1	None	0	D	II	9112663	9112659	9112673	9	agaatgaaa	1	CCTAAAAAGAATGAAAAACAA	No_gene	No_gene
CD0003a	cep-1	None	0	D	II	4397196	4397195	4397202	2	ga	1	CCCTGAGAGAAAGT	ZK430.8	+
CD0003a	cep-1	None	0	D	II	7642615	7642614	7642616	1	c	1	GTTTCTCAG	R153.1	-
CD0003c	cep-1	None	0	D	IV	9799689	9799688	9799710	9	tattatata	1	ATATTATTATATATATTATATATATATCT	T13F2.1	+
CD0003c	cep-1	None	0	D	V	16183938	16183937	16183945	1	t	1	CTGGTTTTTTTATTC	K05D4.3	+
CD0003d	cep-1	None	0	D	II	1405562	1405561	1405566	3	ttt	1	TTCGTTTTAAAA	Y51H7C.6	+
CD0003d	cep-1	None	0	DI	V	6585109	6585109	6585175	67	AAAAA	1	TTTTCTTGAAAATTTCTTTAGAATCTTTGATTTACATAAGGCGGAAAAATTACACATTTAAAAAAACGGGAAC	No_gene	No_gene
CD0004a	xpa-1	None	0	D	II	2919446	2919445	2919457	10	gtctcgccac	1	TTGAGTCTCGCCACGAAAA	No_gene	No_gene
CD0004a	xpa-1	None	0	DI	IV	3201474	3201474	3201559	86	TATAT	1	TTTATTCAAATATTTTTCTTTTTCAGTTTAATTCAGTTTAAAATCCATTACAAAAAGTAGCATATCGACTTAAAAACTACCAAAAGTTAAGC	Y67D8B.3	-
CD0004a	xpa-1	None	0	D	V	19136233	19136232	19136237	1	a	1	GCTGAAAATCGA	No_gene	No_gene
CD0004c	xpa-1	None	0	D	II	7639809	7639808	7639816	1	t	1	CCCGTTTTTTTCTCT	R153.1	-
CD0004c	xpa-1	None	0	D	V	5093622	5093621	5093630	1	a	1	GGAGAAAAAAAATGAT	No_gene	No_gene
CD0004d	xpa-1	None	0	D	II	13282982	13282981	13282986	1	g	1	GGTTGGGGTGGG	Y48C3A.5	+
CD0004d	xpa-1	None	0	D	II	14777808	14777807	14777814	1	c	1	AATTCCCCCCTCCC	Y54E2A.4	+
CD0005a	fcd-2	None	0	D	IV	11998305	11998304	11998312	1	t	1	GTTGTTTTTTTAATT	ZK617.1	-
CD0005a	fcd-2	None	0	D	IV	12802424	12802423	12802489	64	tggag<54>gttac	1	GGGATGGAGCGTGTTCGGGTAGCCCGCCTACCTCACATCCCGGCCTCTCCCTTCTAAAGCTTCGTTACTTTTT	No_gene	No_gene
CD0005d	fcd-2	None	0	D	II	13359496	13359495	13359567	65	tgaat<55>aaatc	1	AATTTGAATTGCCGCCAAAATTTCTCTTTAAAAGTATGATTTCCCGCGCCAAATTTTTCTCAGAAAATCTGAATTTCCG	No_gene	No_gene
CD0005d	fcd-2	None	0	I	IV	14714133	14714133	14714134	4	CACC	1	AGCGAGAG	Y57G11C.2	+
CD0005d	fcd-2	None	0	D	V	19060513	19060512	19060516	2	ct	1	TCTGCTCACCA	Y39B6A.19	+
CD0006c	lig-4	None	0	D	V	17997892	17997891	17997927	23	caccg<13>gaggt	1	AACACACCGAAAAGGGAGGGGGGAGGTCACCGAAAAGGGGGGA	Y59A8B.20	-
CD0006c	lig-4	None	0	D	V	18886489	18886488	18886493	3	ccg	1	TAAACCGCATTT	Y80D3A.2	-
CD0006d	lig-4	None	0	I	III	3749021	3749021	3749029	1	T	1	TTAATTTTTTTCAAT	F34D10.6	-
CD0009c	mrt-2	None	0	D	X	11899091	11899090	11899101	9	cggccaatg	1	AGGACGGCCAATGCCGTC	No_gene	No_gene
CD0009f	mrt-2	None	0	D	IV	3339751	3339750	3339757	4	gata	1	GTTTGATAGACATG	No_gene	No_gene
CD0009h	mrt-2	None	0	D	V	1330990	1330989	1331005	12	ttttttcgaaaa	1	CTTTTTTTTTCGAAAATTTGACC	No_gene	No_gene
CD0011a	xpa-1	Aflatoxin	0	I	I	5984777	5984773	5984778	1	T	0.933333	ATTTAAAATTTT	C06A5.6	-
CD0011a	xpa-1	Aflatoxin	0	I	I	10516990	10516990	10517002	16	CGGCTCCAAAATTCAT	0.9375	ACTACGGCTCCAAAATTCA	F59C6.15	-
CD0012c	csb-1	Aflatoxin	0	I	X	14571351	14571348	14571352	1	G	0.75	TTGGAAAGGGG	C44H4.4	-
CD0013d	xpc-1	Aflatoxin	0	D	IV	10652611	10652610	10652614	2	ct	1	AGTGCTCATGT	No_gene	No_gene
CD0016c	N2	Aflatoxin	0.3	I	V	1806405	1806405	1806413	1	A	1	ATTGAAAAAAATCGT	No_gene	No_gene
CD0017c	xpa-1	Aflatoxin	0.3	D	X	4888126	4888125	4888133	1	a	1	ACAGAAAAAAAGACT	T07F12.3	+
CD0017d	xpa-1	Aflatoxin	0.3	D	IV	13834784	13834783	13834878	93	tgctc<83>ctcag	1	GTGCTGCTCTGCCACGAGCAATTGCCAGCCTGTGGCCTTGACGTGCAGACACATATGGACTCGTTCGGTATTGCCTGAAATTAGAAATAATGCTCAGTTGAT	H08M01.2	+
CD0018a	csb-1	Aflatoxin	0.3	D	II	13985488	13985487	13985489	1	c	1	ATTTCTTCG	No_gene	No_gene
CD0018d	csb-1	Aflatoxin	0.3	I	V	13647386	13647378	13647391	24	ATCCCGANCCCGATCACGATCCCG	0.333333	ATCCCGATCCCGATCCATCC	H37A05.4	-
CD0018d	csb-1	Aflatoxin	0.3	I	X	8410028	8410028	8410029	2	TT	0.916667	CTAGTTTT	F08F1.9	-
CD0018d	csb-1	Aflatoxin	0.3	D	IV	440223	440222	440305	82	cgaat<72>gaaaa	1	ATCGCGAATAATATTTTGTAAGCCTCAAAATGACAAGAGAAGTTGAATAAAAAGTTACGATGTGACCAAGACAAACATTGTGAAAATGAA	Y66H1A.6	-
CD0019c	xpc-1	Aflatoxin	0.3	D	V	8156619	8156618	8156624	1	t	1	AATATTTTTCTGA	No_gene	No_gene
CD0019d	xpc-1	Aflatoxin	0.3	D	V	4870079	4870078	4870165	84	ccaaa<74>attcg	1	AATCCCAAATTTTTAATTCTGCTAAACCACCCCACCCTCATTCGCTGCAGCTCTTGCTCCTGGAGCCCTATTGCCATTCATTTATTCGCCGCCG	T19H12.5	+
CD0020c	xpf-1	Aflatoxin	0.3	I	III	10801333	10801333	10801337	1	T	1	TAAATTTGAAT	K11D9.3	-
CD0020c	xpf-1	Aflatoxin	0.3	D	V	19063506	19063505	19063588	82	ttacc<72>catcg	1	ATTTTTACCGAAAATCGATATTTTCAGGAATCCCACTCACCTTGGCATTGCTATCGGCAATTGTCGCTAGAATGAGAGAACCATCGCATA	Y39B6A.19	+
CD0020d	xpf-1	Aflatoxin	0.3	D	II	14258492	14258491	14258497	1	a	1	TGCTAAAAATGGA	Y54G11A.1	-
CD0021d	polq-1	Aflatoxin	0.3	D	I	11913586	11913585	11913592	1	t	1	AAGATTTTTTGCCG	R06C1.1	-
CD0023a	xpa-1	Aflatoxin	3	I	I	10516994	10516990	10516995	16	GCCAAAATTCATCGGC	0.333333	ACTACGGCTCCA	F59C6.15	-
CD0023a	xpa-1	Aflatoxin	3	D	IV	16711546	16711545	16711547	1	g	1	CAAAGTTCT	No_gene	No_gene
CD0023c	xpa-1	Aflatoxin	3	D	I	2907426	2907425	2907429	3	atc	1	ATAAATCGAGA	Y71F9AL.4	+
CD0023c	xpa-1	Aflatoxin	3	D	III	11875885	11875884	11875901	2	ta	1	TATTTATATATATATATATACATA	Y56A3A.6	-
CD0023d	xpa-1	Aflatoxin	3	D	II	3890627	3890626	3890644	2	ct	1	CTAACTCTCTCTCTCTCTCTCCATA	No_gene	No_gene
CD0023d	xpa-1	Aflatoxin	3	D	IV	13808863	13808862	13808864	1	g	1	ATGCGCCCC	No_gene	No_gene
CD0023d	xpa-1	Aflatoxin	3	I	V	840764	840764	840767	1	A	1	GAGGAAGGCC	K09C6.8	-
CD0023d	xpa-1	Aflatoxin	3	D	X	509318	509317	509335	2	ta	1	TTTTTATATATATATATATATTTTT	No_gene	No_gene
CD0024c	csb-1	Aflatoxin	3	D	I	6206696	6206695	6206700	2	at	1	ATAAATATGTTA	T05E7.1	+
CD0024c	csb-1	Aflatoxin	3	D	X	4392217	4392216	4392224	4	cgtc	1	AACTCGTCCGTAACA	R160.1	+
CD0024d	csb-1	Aflatoxin	3	D	IV	1118366	1118365	1118480	96	aaatc<86>tccgt	1	CCTCAAATCTACACAAGCTCCCCGTAAATTTACACAGGCCCCCAGTAAATCTCAACAAACCCCCCCCCCCCTCTCCCGTAAATCTACACAATCTCTCCGTAAATCTACACAAGCTCCCAGAC	C44B12.4	-
CD0024d	csb-1	Aflatoxin	3	D	V	3166796	3166795	3166802	4	atgt	1	GAAAATGTATTTTT	C36C5.4	+
CD0024d	csb-1	Aflatoxin	3	I	I	2683026	2683026	2683039	2	AG	1	AGATAGAGAGAGAGAGGAAG	No_gene	No_gene
CD0024d	csb-1	Aflatoxin	3	D	X	11981591	11981590	11981595	1	g	1	AGTTGGGGAAAG	C49F5.4	-
CD0025a	xpc-1	Aflatoxin	3	D	V	1484537	1484536	1484611	72	acgga<62>cgctc	1	TAAGACGGAAACACCTAAAACTGTGCCTTTTTTGAATTTTCCCCGCTTTTCCTAGTTATTTTCATAGAATTCGCTCACTTTT	No_gene	No_gene
CD0025a	xpc-1	Aflatoxin	3	D	V	17664451	17664450	17664521	67	gctcg<57>gacaa	1	AACTGCTCGCATAGAAAAACCTATAATTCGTCGCCGGGGCTTGAACCCCTGACCTTCTGCGTGGGAGACAAGCTTCCT	No_gene	No_gene
CD0025a	xpc-1	Aflatoxin	3	D	III	2803696	2803692	2803707	10	aagaatgaat	1	TTATAATAAGAATGAATATTTA	No_gene	No_gene
CD0025c	xpc-1	Aflatoxin	3	I	IV	16310956	16310950	16310957	1	C	1	GTTTCCCCCCGAAG	No_gene	No_gene
CD0025c	xpc-1	Aflatoxin	3	D	V	14411568	14411567	14411573	2	ta	1	CAACTATATTCTG	C15H11.2	+
CD0025d	xpc-1	Aflatoxin	3	DI	III	889610	889610	889659	50	AAATCA	1	AAACGCCGTACGACTCATGAGAACACTAGATAGATTCTCTTAAGTGTTTTGTTTTG	No_gene	No_gene
CD0026a	xpf-1	Aflatoxin	3	D	V	4196103	4196102	4196201	98	ccgac<88>cattt	1	TCCACCGACGAAACGGCTGATATAGTCGTTCAAATCGGCGCTAGGCGTCAGAATTTACGAGTTTTGAAAATGAAAGCTAATCGGGGAAAAGGTAAGGCATTTTTTA	H43I07.3	+
CD0027a	polq-1	Aflatoxin	3	I	X	15209614	15209608	15209615	1	G	1	AAACGGGGGGAAGT	H03A11.1	-
CD0030a	N2	None	0	I	I	1097088	1097088	1097097	6	TAAAGC	1	ATTTTAAAGCTATAAT	No_gene	No_gene
CD0030a	N2	None	0	D	II	1360690	1360689	1360694	1	a	1	AATTAAAATTGG	No_gene	No_gene
CD0030a	N2	None	0	D	IV	15906438	15906435	15906513	74	actgt<64>ctatt	1	AAATTTACTGTTGCATATTAATCACTTTCAAAATTTGAATTGTTTTTTTTTCTAACACATACTGTTTCACCTTCTCTATTAATTC	No_gene	No_gene
CD0030c	N2	None	0	D	IV	17233137	17233136	17233209	70	ggcaa<60>agaag	1	AAATGGCAACTCTCTCTTCAATTTCCGCTTTTTTCATTCAACGAAAAAGTTTTGGATGAGAGCTTATGGAGAAGGGGGCA	No_gene	No_gene
CD0031d	ced-4	None	0	I	II	2682335	2682335	2682339	1	A	1	ATATAAATAAT	No_gene	No_gene
CD0031d	ced-4	None	0	D	X	16703743	16703742	16703799	28	ccgca<18>tcgtt	1	GTCGCCGCATGTTCTCTCTACTGCCACTCGTTCCGCATGTTCTCTCTACTGCCACTCGTTTCGC	No_gene	No_gene
CD0032a	N2	Mechlorethamine	0	D	II	1957241	1957240	1957247	3	tct	1	ATGCTCTTCTAAAT	ZK250.8	-
CD0034a	fcd-2	Mechlorethamine	0	D	IV	15906355	15906354	15906371	2	ag	1	AGGAAGAGAGAGAGAGAGAGGTGA	No_gene	No_gene
CD0035a	N2	Mechlorethamine	20	D	I	5472457	5472456	5472465	6	gacaga	1	GACTGACAGAGATAAT	T05E8.3	-
CD0035a	N2	Mechlorethamine	20	D	II	3096487	3096486	3096494	5	ctagc	1	AGCTCTAGCCTTGAA	Y25C1A.14	-
CD0035a	N2	Mechlorethamine	20	D	II	11928906	11928905	11928922	2	tc	1	TTCGTCTCTCTCTCTCTCTCAAGG	W03C9.4	-
CD0035a	N2	Mechlorethamine	20	D	II	12360116	12360115	12360124	4	gtct	1	GGAGGTCTGTCTTTTG	Y57A10B.1	-
CD0035a	N2	Mechlorethamine	20	I	II	6645881	6645881	6645882	19	TTGAGAGTGCACGGCGTGA	1	CATGACCA	No_gene	No_gene
CD0035a	N2	Mechlorethamine	20	D	V	13767730	13767729	13767736	5	ggtct	1	GCGAGGTCTGACCC	F20G2.3	-
CD0035a	N2	Mechlorethamine	20	D	V	14625734	14625733	14625741	7	ggcaatc	1	CAAAGGCAATCAATT	F43D2.4	+
CD0035a	N2	Mechlorethamine	20	I	V	7361876	7361876	7361878	4	AGAC	1	TCTGACCAG	No_gene	No_gene
CD0035a	N2	Mechlorethamine	20	D	X	937546	937545	937551	3	gat	1	TATCGATGACTAT	F35H12.1	+
CD0035a	N2	Mechlorethamine	20	D	X	3183375	3183374	3183387	9	tggcacccg	1	CTAATGGCACCCGTGGGTTG	F56E3.10	-
CD0035a	N2	Mechlorethamine	20	D	X	6501806	6501805	6501813	6	attgtg	1	TGTTATTGTGACTGT	C15B12.7	-
CD0035a	N2	Mechlorethamine	20	D	IV	2092265	2092264	2092267	2	ga	1	TTTTGACCAC	C23H5.11	-
CD0035a	N2	Mechlorethamine	20	D	III	5038244	5038243	5038246	2	ac	1	GAAGACGTAT	C45G9.6	+
CD0035c	N2	Mechlorethamine	20	D	I	14587994	14587993	14588022	15	agaag<5>gaata	1	CCTCAGAAGAAGAAGAATAAGAAGAAGAAGAAGTAG	Y105E8A.29	-
CD0035c	N2	Mechlorethamine	20	D	IV	353207	353206	353264	31	ctatt<21>cgggg	1	GGGACTATTGTAGGAGTACGGTAGGATTACCGGGGCTATTGTAGGAGTACGGTAGGATTACTGTA	F18F11.3	+
CD0035c	N2	Mechlorethamine	20	D	II	5839618	5839617	5839629	9	aggaaactt	1	GATAAGGAAACTTAGAATG	ZK1248.16	-
CD0035c	N2	Mechlorethamine	20	D	II	6973584	6973583	6973600	2	ga	1	ACACGAGAGAGAGAGAGAGAAGGT	C15F1.7	-
CD0035c	N2	Mechlorethamine	20	D	II	8477222	8477221	8477227	3	ggc	1	AGTGGGCGGATGC	M05D6.3	+
CD0035c	N2	Mechlorethamine	20	I	X	3435575	3435575	3435582	7	AAATTGA	1	TTTGAAATTGCCAA	No_gene	No_gene
CD0035c	N2	Mechlorethamine	20	I	X	7903149	7903149	7903150	1	T	0.666667	ACAGTTTT	No_gene	No_gene
CD0035d	N2	Mechlorethamine	20	DI	II	13510856	13510856	13510868	13	T	1	ATTGTCATCGGATTCCGAT	F54F11.2	+
CD0035d	N2	Mechlorethamine	20	D	X	14759232	14759231	14759240	1	t	1	TAACTTTTTTTTGAGA	C05G5.5	-
CD0035d	N2	Mechlorethamine	20	D	X	17545186	17545185	17545253	66	tcctt<56>agtat	1	TCCATCCTTGACCAGGACTATATTGACAATTGGAACACAATTTTAATGACCGGAATCTTGAAATTAGTATTTATA	No_gene	No_gene
CD0035d	N2	Mechlorethamine	20	DI	IV	398277	398277	398284	8	GCAT	1	GTAAACAAGCATTT	T07A9.8	+
CD0035d	N2	Mechlorethamine	20	D	V	5222782	5222781	5222809	26	agtga<16>gtccg	1	CAATAGTGACACGTCGTGCCAGACTGTCCGATTAC	No_gene	No_gene
CD0035d	N2	Mechlorethamine	20	D	III	4695874	4695873	4695880	5	agccc	1	ATTGAGCCCATGGG	T04A8.7	+
CD0035d	N2	Mechlorethamine	20	I	III	5838940	5838940	5838942	2	AA	1	GGTGACAGA	No_gene	No_gene
CD0035d	N2	Mechlorethamine	20	D	I	3660739	3660738	3660741	2	tg	1	GGAATGCCTG	T28F2.7	-
CD0036a	fan-1	Mechlorethamine	20	D	I	5411405	5411404	5411413	7	tgacccg	1	GTTTTGACCCGTCAAA	No_gene	No_gene
CD0036a	fan-1	Mechlorethamine	20	D	I	11079250	11079249	11079257	6	cgtcgt	1	AGCACGTCGTCCTCC	W02B9.1	-
CD0036a	fan-1	Mechlorethamine	20	D	I	11831021	11831020	11831025	3	acc	1	TACAACCAATAC	Y47H9C.1	-
CD0036a	fan-1	Mechlorethamine	20	D	II	5578275	5578274	5578318	43	aaagt<33>tcgct	1	TATAAAAGTGAAATGAATGGCAACAAATACTCATCAAGCTTCTCGCTTTTT	T25E4.1	+
CD0036a	fan-1	Mechlorethamine	20	D	II	8821487	8821486	8821493	4	gacc	1	AGGTGACCGAACTC	No_gene	No_gene
CD0036a	fan-1	Mechlorethamine	20	D	IV	1543049	1543048	1543056	7	tatacgc	1	TAGGTATACGCCTAC	No_gene	No_gene
CD0036a	fan-1	Mechlorethamine	20	D	IV	4506718	4506717	4506734	15	cacga<5>tcctc	1	GACACACGACAAGGTCCTCCGCGT	No_gene	No_gene
CD0036a	fan-1	Mechlorethamine	20	DI	IV	13957010	13957010	13957015	6	AA	1	AAGGTTTTTAAA	C27H2.2	+
CD0036a	fan-1	Mechlorethamine	20	DI	IV	14347821	14347821	14347832	12	T	1	ATTGCCAATTTTCAAGAA	Y67A10A.1	-
CD0036a	fan-1	Mechlorethamine	20	D	III	3284088	3284087	3284100	9	gcctacgcg	1	GAGAGCCTACGCGGCCACAG	Y53G8AR.7	+
CD0036a	fan-1	Mechlorethamine	20	D	III	8560921	8560920	8560933	10	aatttttact	1	CCTAAATTTTTACTAAAAAT	No_gene	No_gene
CD0036a	fan-1	Mechlorethamine	20	I	III	11507153	11507153	11507154	1	T	0.75	TCAATTTT	Y66D12A.20	+
CD0036a	fan-1	Mechlorethamine	20	D	X	2521773	2521772	2521785	10	gacccatttt	1	AAAAGACCCATTTTGAGCTA	No_gene	No_gene
CD0036a	fan-1	Mechlorethamine	20	D	X	10681991	10681990	10681996	4	cggg	1	AGAACGGGCTTCA	F13E6.3	+
CD0036a	fan-1	Mechlorethamine	20	D	X	12399948	12399947	12399955	6	tgcggg	1	CCATTGCGGGTAAGC	F17E5.1	-
CD0036a	fan-1	Mechlorethamine	20	D	V	7115724	7115723	7115728	3	cgg	1	CGAACGGCTGGT	No_gene	No_gene
CD0036c	fan-1	Mechlorethamine	20	D	V	9056375	9056374	9056376	1	a	1	TGACAGGCG	No_gene	No_gene
CD0036c	fan-1	Mechlorethamine	20	D	V	13027199	13027198	13027205	4	ggct	1	CAGAGGCTGGAGAG	F15B9.7	+
CD0036c	fan-1	Mechlorethamine	20	D	II	4536417	4536416	4536438	19	attaa<9>tcagt	1	GCTCATTAACTTGAACGCTCAGTATCATT	B0304.6	-
CD0036c	fan-1	Mechlorethamine	20	D	II	10640227	10640226	10640234	5	cggtc	1	TAGGCGGTCCGCTCT	M28.9	+
CD0036c	fan-1	Mechlorethamine	20	D	II	14147880	14147879	14147896	15	tcatc<5>gtgta	1	AGCTTCATCGGTCAGTGTATTAGT	W03H9.1	-
CD0036c	fan-1	Mechlorethamine	20	DI	II	2509914	2509914	2509917	4	GAA	1	TGTTTCGAAA	F59H5.1	+
CD0036c	fan-1	Mechlorethamine	20	D	I	14794235	14794234	14794249	9	cacgtatgc	1	TAAACACGTATGCCACGTGTCT	No_gene	No_gene
CD0036c	fan-1	Mechlorethamine	20	D	III	5965807	5965806	5965810	1	g	1	ATTAGGGTCAA	No_gene	No_gene
CD0036c	fan-1	Mechlorethamine	20	D	IV	8104015	8104014	8104025	9	tttgcaaca	1	ATATTTTGCAACATACTT	Y42H9AR.5	+
CD0036d	fan-1	Mechlorethamine	20	D	II	2617307	2617306	2617313	5	aggtc	1	GAGGAGGTCAACAA	D2062.7	+
CD0036d	fan-1	Mechlorethamine	20	D	II	8540721	8540720	8540724	2	ct	1	GAGCCTCGTGG	W01C9.3	+
CD0036d	fan-1	Mechlorethamine	20	D	II	11596763	11596762	11596773	10	ccggaaattt	1	TCGACCGGAAATTTAAAA	F07A11.3	-
CD0036d	fan-1	Mechlorethamine	20	D	III	3557482	3557481	3557493	6	caaagg	1	ACCACAAAGGCAAAGTCGG	No_gene	No_gene
CD0036d	fan-1	Mechlorethamine	20	D	IV	5623983	5623982	5623984	1	a	1	TCAGACTTT	No_gene	No_gene
CD0036d	fan-1	Mechlorethamine	20	D	IV	7949093	7949092	7949098	3	acc	1	GACGACCACGTGA	F20D12.2	+
CD0036d	fan-1	Mechlorethamine	20	D	IV	11789137	11789136	11789165	26	tatgc<16>cgacc	1	AATATATGCCTGCCTGCCTTCACCGCGACCTACGCC	H01G02.3	-
CD0036d	fan-1	Mechlorethamine	20	D	IV	14383462	14383461	14383472	10	gggccttaac	1	GTTTGGGCCTTAACTTAT	Y67A10A.8	-
CD0036d	fan-1	Mechlorethamine	20	D	IV	17313666	17313665	17313671	4	gtcg	1	AGGTGTCGGCTAC	C49C3.1	+
CD0036d	fan-1	Mechlorethamine	20	I	IV	4306226	4306226	4306227	42	TTTTTAAGCATCTTCTTGAGTACAGTAACCCGCGAGGTATTA	0.909091	TTGTCACC	No_gene	No_gene
CD0036d	fan-1	Mechlorethamine	20	D	V	610124	610123	610150	25	ggctc<15>cttgg	1	TGCAGGCTCATGTTTGAAATTTTTCTTGGGACGC	No_gene	No_gene
CD0036d	fan-1	Mechlorethamine	20	D	X	1405558	1405557	1405572	11	aagcaaaagcc	1	CTCTAAGCAAAAGCCAAGGAAT	ZK402.1	+
CD0036d	fan-1	Mechlorethamine	20	I	X	13545343	13545342	13545344	20	TATTTCTATAGTTATTATTT	1	AAAGTCTCG	R01E6.1	-
CD0037a	fcd-2	Mechlorethamine	20	D	IV	3483124	3483123	3483153	26	cctgc<16>aacca	1	CCTGCCTGCCTTGCGCCGCAGAAAGAACCACCTTTCA	C09G12.11	+
CD0037a	fcd-2	Mechlorethamine	20	D	III	5120727	5120726	5120737	10	gacctattgg	1	TGATGACCTATTGGCACC	F21H11.2	+
CD0037a	fcd-2	Mechlorethamine	20	D	III	13400501	13400500	13400510	8	taagttta	1	GTTTTAAGTTTATGAAG	F11F1.1	+
CD0037a	fcd-2	Mechlorethamine	20	D	V	16712173	16712172	16712181	3	aca	1	CATTACAACAACCAAC	Y70C5C.8	-
CD0037c	fcd-2	Mechlorethamine	20	D	I	8478360	8478359	8478364	3	atg	1	TCTTATGACTTA	No_gene	No_gene
CD0037c	fcd-2	Mechlorethamine	20	D	II	11430768	11430767	11430775	5	ctgag	1	GTTACTGAGCTTCTT	No_gene	No_gene
CD0037d	fcd-2	Mechlorethamine	20	D	I	12296024	12296023	12296028	3	gcc	1	CCAAGCCGTCTT	F56H6.6	-
CD0037d	fcd-2	Mechlorethamine	20	D	I	13172200	13172199	13172207	4	tcgg	1	GTGCTCGGTCGCCTG	F22G12.5	+
CD0037d	fcd-2	Mechlorethamine	20	D	V	11214168	11214167	11214194	24	atcat<14>ttgtc	1	TGTTATCATTTCTTATCGTTAACTTGTCATGTCA	K10D6.4	+
CD0037d	fcd-2	Mechlorethamine	20	D	V	20134351	20134350	20134353	1	g	1	CTTCGGTCCT	No_gene	No_gene
CD0037d	fcd-2	Mechlorethamine	20	I	V	5558731	5558731	5558732	2	AG	1	GAGCCTAA	No_gene	No_gene
CD0037d	fcd-2	Mechlorethamine	20	DI	IV	675929	675929	675931	3	T	1	CAGGACTGA	No_gene	No_gene
CD0040c	fcd-2	Cisplatin	0	D	II	747812	747811	747815	3	aaa	1	CATCAAATATT	C08G5.4	-
CD0040d	fcd-2	Cisplatin	0	D	I	1392453	1392452	1392459	1	a	1	TCTCAAAAAACTCG	Y92H12BM.1	-
CD0040d	fcd-2	Cisplatin	0	D	I	2248569	2248568	2248604	27	atttg<17>ggcaa	1	CAATATTTGCCGAGCACGGCAAATTCGGCAAATTTGCCGTGCT	No_gene	No_gene
CD0041c	lig-4; fcd-2	Cisplatin	0	D	V	16241414	16241413	16241416	1	c	1	TTTTCCAAGC	F21H7.13	-
CD0041c	lig-4; fcd-2	Cisplatin	0	D	V	16241492	16241491	16241539	46	aaaac<36>ggcac	1	GATAAAAACTGTTAGAACTGGATTAACTCCAAAAAGAGATGGAATGGCACATTGA	F21H7.13	-
CD0041d	lig-4; fcd-2	Cisplatin	0	I	II	5421452	5421452	5421454	1	G	1	AAACGATTC	EEED8.1	+
CD0042a	lig-4	Cisplatin	0	I	III	2435896	2435896	2435897	1	C	0.666667	CATGCCCC	No_gene	No_gene
CD0042d	lig-4	Cisplatin	0	D	I	12985544	12985543	12985554	9	ggcaaattt	1	ATTCGGCAAATTTGCCGC	No_gene	No_gene
CD0042d	lig-4	Cisplatin	0	I	II	580388	580388	580396	1	T	1	CTGATTTTTTTAATT	W08F4.8	-
CD0043c	mus-81	Cisplatin	0	I	II	9859169	9859169	9859178	1	C	1	GGATCCCCCCCCTGGA	C08H9.11	-
CD0043d	mus-81	Cisplatin	0	D	I	2750824	2750823	2750825	1	t	1	GAAGTGGGG	No_gene	No_gene
CD0043d	mus-81	Cisplatin	0	D	I	13786262	13786261	13786266	1	t	1	CAAATTTTGCGG	Y37H9A.3	+
CD0045a	slx-1	Cisplatin	0	D	X	4020300	4020299	4020306	1	t	1	AAACTTTTTTGTCT	R02E12.2	+
CD0045c	slx-1	Cisplatin	0	I	X	1296457	1296457	1296458	1	C	0.857143	TCTTCCCC	C52B11.3	+
CD0046a	xpf-1	Cisplatin	0	D	IV	4676116	4676115	4676117	1	a	1	ATGGAGGGG	No_gene	No_gene
CD0046c	xpf-1	Cisplatin	0	I	III	3524025	3524025	3524034	1	A	0.966667	GCTGAAAAAAAACGCT	M01F1.7	-
CD0046d	xpf-1	Cisplatin	0	D	II	3408907	3408906	3408914	3	ttg	1	GTATTTGTTGTACAT	F18A12.3	+
CD0046d	xpf-1	Cisplatin	0	D	X	13935822	13935821	13935823	1	g	1	ATCTGCCCC	K02B9.4	+
CD0047c	N2	Cisplatin	10	D	I	973331	973330	973335	2	ag	1	GATCAGAGGGGG	No_gene	No_gene
CD0047c	N2	Cisplatin	10	D	II	7039209	7039208	7039211	2	gg	1	CAACGGAGCT	ZK1127.7	+
CD0047c	N2	Cisplatin	10	D	II	8164189	8164188	8164212	21	tctga<11>aaagc	1	TACTTCTGAAGCTTTCTCGCAAAGCTCCTGG	F10B5.7	+
CD0047c	N2	Cisplatin	10	DI	V	1632701	1632701	1632712	12	T	1	AGGCCGGACTCGAACTCG	Y46H3D.4	+
CD0047d	N2	Cisplatin	10	D	V	850995	850994	851003	5	taagc	1	AGCTTAAGCTAACTCC	K09C6.4	+
CD0048a	fan-1	Cisplatin	10	D	I	5876702	5876701	5876725	22	gcgca<12>atcat	1	TCCAGCGCATCTGAAATAGTTATCATGAAGT	C34G6.6	-
CD0048a	fan-1	Cisplatin	10	D	II	1684983	1684982	1684990	7	tgatgag	1	GTTTTGATGAGCAGA	F58E1.2	+
CD0048a	fan-1	Cisplatin	10	I	II	13284065	13284065	13284067	6	CTTGAT	0.9375	TCGGCCATA	Y48C3A.5	+
CD0048a	fan-1	Cisplatin	10	D	V	12905993	12905992	12906001	7	agccaca	1	ATTGAGCCACAATCAA	No_gene	No_gene
CD0048a	fan-1	Cisplatin	10	D	V	20508321	20508320	20508331	8	tcgaagct	1	TTTGTCGAAGCTTCCTCC	Y38H6C.5	+
CD0048c	fan-1	Cisplatin	10	D	I	6422623	6422622	6422669	45	gtgct<35>tcatt	1	TGGAGTGCTCACAGCTCAATCAATTGGAGAATATTTGGAGAGCTTCATTGCAGC	F37E3.1	+
CD0048c	fan-1	Cisplatin	10	D	II	5501482	5501481	5501495	12	aacgtgcatgcc	1	TTCGAACGTGCATGCCATTTT	No_gene	No_gene
CD0048c	fan-1	Cisplatin	10	D	III	7774148	7774147	7774153	4	gcca	1	GTTGGCCAGGCTG	No_gene	No_gene
CD0048c	fan-1	Cisplatin	10	D	III	11693857	11693856	11693864	4	gggc	1	AAGTGGGCGGGGTTT	No_gene	No_gene
CD0048c	fan-1	Cisplatin	10	D	V	3162410	3162409	3162417	5	cgagc	1	GTGGCGAGCCGCATA	No_gene	No_gene
CD0048c	fan-1	Cisplatin	10	D	V	9738867	9738866	9738879	6	gctgga	1	GATCGCTGGAGCTGGAAAGA	F40F9.9	+
CD0048c	fan-1	Cisplatin	10	D	V	9738874	9738873	9738880	6	ctggaa	1	GGAGCTGGAAAGAT	F40F9.9	+
CD0048c	fan-1	Cisplatin	10	D	V	18286814	18286813	18286819	2	gc	1	CGTGGCGCGTAAG	Y51A2A.1	+
CD0048c	fan-1	Cisplatin	10	D	X	1728921	1728920	1728935	13	ttacattttcagc	1	TCAATTACATTTTCAGCTAATT	F07G6.2	+
CD0048c	fan-1	Cisplatin	10	D	X	7387943	7387942	7387954	8	cagggcgt	1	ACTACAGGGCGTCAGAGTA	C56G3.1	+
CD0048d	fan-1	Cisplatin	10	I	II	2773674	2773673	2773675	15	CGCGTCGCGTTTAAA	1	GCATATGGA	No_gene	No_gene
CD0048d	fan-1	Cisplatin	10	I	II	9146586	9146586	9146587	2	AT	1	TGAGCTCT	No_gene	No_gene
CD0048d	fan-1	Cisplatin	10	D	III	4639483	4639482	4639491	7	gcttttc	1	AAGAGCTTTTCGAACA	F10F2.2	-
CD0048d	fan-1	Cisplatin	10	D	III	12677682	12677681	12677690	1	a	1	AGCCAAAAAAAACAAA	Y111B2A.17	+
CD0048d	fan-1	Cisplatin	10	I	III	10938920	10938920	10938921	3	ATG	1	GTCAGCCC	M142.6	+
CD0048d	fan-1	Cisplatin	10	D	I	3208316	3208315	3208324	7	tgtcttt	1	AAGGTGTCTTTTTCTA	Y54E10A.17	+
CD0048d	fan-1	Cisplatin	10	DI	I	6208820	6208820	6208836	17	GATAATTTTTTT	1	CAGCGGTTAACTTCATCAGCTTA	T08B2.7	-
CD0048d	fan-1	Cisplatin	10	D	V	4494784	4494783	4494787	3	cta	1	ATTGCTAGCGA	No_gene	No_gene
CD0048d	fan-1	Cisplatin	10	D	V	14543265	14543264	14543269	3	cag	1	GTTTCAGCTAGA	No_gene	No_gene
CD0048d	fan-1	Cisplatin	10	D	V	17287843	17287842	17287848	4	ctga	1	GCGGCTGACACTT	K10G4.9	+
CD0048d	fan-1	Cisplatin	10	D	X	10703371	10703370	10703379	7	ttcaggc	1	GTGATTCAGGCTACAA	F13E6.6	-
CD0048d	fan-1	Cisplatin	10	D	X	15933441	15933440	15933450	3	cgc	1	TCTTCGCCGCCGCTGAA	E03G2.2	-
CD0048d	fan-1	Cisplatin	10	D	X	17265306	17265305	17265323	15	agcct<5>gggaa	1	ATATAGCCTAGCTAGGGAAAGTTTT	Y40C7B.5	-
CD0048d	fan-1	Cisplatin	10	DI	X	15933444	15933444	15933469	26	T	1	CGCCGCCGCTGAAAACATTTTGAATAAAGTTT	E03G2.2	-
CD0049a	fcd-2	Cisplatin	10	D	IV	6980951	6980950	6980954	2	ca	1	ATAGCACCCCC	ZK381.5	-
CD0049c	fcd-2	Cisplatin	10	I	I	14567700	14567693	14567701	1	A	1	AAGTAAAAAAATCAT	Y105E8A.24	-
CD0049c	fcd-2	Cisplatin	10	D	II	237179	237178	237193	11	ttggagctttt	1	TTTCTTGGAGCTTTTTTGATCG	Y43H11AL.2	-
CD0049c	fcd-2	Cisplatin	10	D	IV	15166115	15166114	15166123	2	at	1	GAAAATATATATCATT	No_gene	No_gene
CD0049c	fcd-2	Cisplatin	10	D	IV	16758567	16758566	16758581	11	ctgtgcaggag	1	TTGACTGTGCAGGAGCTGCTGG	Y43D4A.10	-
CD0049d	fcd-2	Cisplatin	10	D	I	1420425	1420424	1420435	7	acggcta	1	AGCGACGGCTAACGATAC	Y92H12BR.3	+
CD0049d	fcd-2	Cisplatin	10	I	IV	8062051	8062050	8062053	2	TG	0.909091	GTGTGGACTG	No_gene	No_gene
CD0050a	lig-4; fcd-2	Cisplatin	10	D	IV	1296002	1296001	1296051	48	ttttt<38>tttgg	1	TATTTTTTTCGTGTATTTCTACTAATTTTCGCCTTTTTTCTCGGATTTTTGGTGGAA	No_gene	No_gene
CD0050a	lig-4; fcd-2	Cisplatin	10	D	X	14599507	14599506	14599519	9	gctttggag	1	ACAAGCTTTGGAGGCTCAAT	No_gene	No_gene
CD0050c	lig-4; fcd-2	Cisplatin	10	D	III	2940665	2940664	2940671	1	c	1	TCTTCCCCCCGCAT	R10F2.6	-
CD0050d	lig-4; fcd-2	Cisplatin	10	D	II	3885483	3885482	3885496	13	taaaagtggaggg	1	AGAATAAAAGTGGAGGGCAAG	F53C3.10	-
CD0050d	lig-4; fcd-2	Cisplatin	10	I	II	8730149	8730136	8730150	12	GCCGCAAAAACG	1	TCCAGGCCGCAAAAACGTTCT	No_gene	No_gene
CD0050d	lig-4; fcd-2	Cisplatin	10	I	II	13518647	13518647	13518648	1	T	0.916667	GGGGTTTT	F54F11.3	+
CD0051a	lig-4	Cisplatin	10	D	V	4348717	4348716	4348729	11	gctggaatcat	1	CAAAGCTGGAATCATGACGA	F32D1.10	+
CD0051a	lig-4	Cisplatin	10	D	X	14627104	14627103	14627133	28	actat<18>gtgtg	1	ACATACTATAGGTGTAGGAGCATCGAAGTGTGAACTC	F54E4.2	-
CD0051c	lig-4	Cisplatin	10	I	II	8222219	8222218	8222220	1	T	0.666667	AATTGTTTT	No_gene	No_gene
CD0051d	lig-4	Cisplatin	10	D	III	2535383	2535382	2535396	10	ggctctccgc	1	GTCTGGCTCTCCGCGGCCGCG	Y54F10AM.4	+
CD0051d	lig-4	Cisplatin	10	I	III	11688416	11688416	11688417	1	T	1	AAAGGATT	Y41C4A.4	+
CD0052a	mus-81	Cisplatin	10	I	IV	1524740	1524740	1524741	29	ACACCTCATGGGTCGGTCGCTGAAAATCC	0.947368	AGCGCCCG	K03H6.1	+
CD0052d	mus-81	Cisplatin	10	D	I	2942998	2942997	2943007	8	ctccatac	1	ACTGCTCCATACCGTCA	Y71F9AM.4	+
CD0052d	mus-81	Cisplatin	10	I	IV	5782390	5782389	5782391	1	T	0.75	GTCCGTTTT	No_gene	No_gene
CD0053c	polq-1	Cisplatin	10	D	V	2590153	2590152	2590191	17	ttttt<7>ttgtc	1	CTTTTTTTTTCCTACTTTGTCTTTTTTCCTACTTTGTCTTTTGCCT	No_gene	No_gene
CD0054c	slx-1	Cisplatin	10	DI	IV	3165997	3165997	3166037	41	GTATAAAT	1	TGTATTCAATCGTGGCTTGGCCCCAACCACCACCACCACGACAGCTA	No_gene	No_gene
CD0054c	slx-1	Cisplatin	10	D	V	18977425	18977424	18977434	7	ggcttgg	1	TGAAGGCTTGGGGTAAT	Y39B6A.41	-
CD0055a	xpf-1	Cisplatin	10	I	I	14612043	14612043	14612044	1	T	0.9	AAGGTTTT	No_gene	No_gene
CD0055a	xpf-1	Cisplatin	10	D	II	1474901	1474900	1474910	6	aggttt	1	TTCGAGGTTTAGGACTA	No_gene	No_gene
CD0055a	xpf-1	Cisplatin	10	D	II	12674409	12674408	12674418	4	aatt	1	AAAAAATTAATTATTTT	Y38E10A.22	-
CD0055a	xpf-1	Cisplatin	10	D	II	13852412	13852411	13852414	2	gg	1	GTTTGGATGA	F08G2.8	+
CD0055a	xpf-1	Cisplatin	10	DI	II	1474904	1474904	1474907	4	AG	1	AGGTTTAGGA	No_gene	No_gene
CD0055a	xpf-1	Cisplatin	10	DI	V	11814618	11814618	11814626	9	T	1	CAACTTAAAAAGCTC	No_gene	No_gene
CD0055a	xpf-1	Cisplatin	10	D	X	12608603	12608602	12608616	11	tatgtagagca	1	GAGTTATGTAGAGCATAAGAA	No_gene	No_gene
CD0055a	xpf-1	Cisplatin	10	D	X	17612904	17612903	17612908	3	cag	1	ACAACAGCTTCT	No_gene	No_gene
CD0055a	xpf-1	Cisplatin	10	I	III	9261007	9261007	9261008	9	ACATGACTT	1	GGAGCTGA	M01A8.2	-
CD0055c	xpf-1	Cisplatin	10	D	I	12575134	12575133	12575143	8	cctgacac	1	ACAGCCTGACACCACGT	No_gene	No_gene
CD0055c	xpf-1	Cisplatin	10	D	III	3075291	3075290	3075302	11	tttttcggcta	1	CCAGTTTTTCGGCTAAAAA	H06I04.3	+
CD0055c	xpf-1	Cisplatin	10	D	III	3751153	3751152	3751154	1	g	1	CACAGCTTG	F34D10.6	-
CD0055c	xpf-1	Cisplatin	10	D	III	10242708	10242707	10242719	10	gacgcagtgc	1	ACCGGACGCAGTGCGTCCG	Y70G10A.3	+
CD0055c	xpf-1	Cisplatin	10	D	IV	292342	292341	292348	5	cgtag	1	ATAACGTAGCTTCT	No_gene	No_gene
CD0055c	xpf-1	Cisplatin	10	D	V	17374992	17374991	17375000	1	a	1	AATTAAAAAAAATATC	Y20C6A.1	-
CD0055c	xpf-1	Cisplatin	10	D	V	20245948	20245947	20245950	2	ag	1	TGGAAGCTTT	Y113G7B.23	-
CD0055d	xpf-1	Cisplatin	10	D	IV	10523673	10523672	10523678	3	agc	1	GAAGAGCAGGTGA	C02F4.5	-
CD0055d	xpf-1	Cisplatin	10	D	V	16461128	16461127	16461132	3	agc	1	CAGGAGCACTTG	No_gene	No_gene
CD0055d	xpf-1	Cisplatin	10	D	X	624949	624948	624952	1	t	1	AAACTTTGGTG	No_gene	No_gene
CD0056a	N2	Cisplatin	50	I	I	14674354	14674354	14674355	13	ACCAATTTTATAT	1	GAGCCTCA	Y105E8B.8	+
CD0056a	N2	Cisplatin	50	D	III	3898223	3898222	3898235	8	ctgcaagc	1	TCGGCTGCAAGCCTGCTATT	F13B10.1	-
CD0056a	N2	Cisplatin	50	D	III	7168433	7168432	7168437	3	gcc	1	CGCAGCCGGTAT	F37C12.7	+
CD0056a	N2	Cisplatin	50	D	II	8924179	8924178	8924191	9	caaatgctc	1	TCTTCAAATGCTCCAACCAC	B0457.6	+
CD0056a	N2	Cisplatin	50	DI	II	8924182	8924182	8924193	12	CCG	1	CAAATGCTCCAACCACGA	B0457.6	+
CD0056a	N2	Cisplatin	50	D	IV	1376997	1376996	1377005	6	agcccc	1	CATGAGCCCCAGGACC	No_gene	No_gene
CD0056a	N2	Cisplatin	50	D	X	8053894	8053893	8053921	27	caaca<17>ctcaa	1	ATCTCAACAGTATCTTTTTTTAATAGCTCAAGTTG	C18A11.7	-
CD0056c	N2	Cisplatin	50	D	IV	16051209	16051208	16051216	6	gctttc	1	GGAAGCTTTCGTTGA	No_gene	No_gene
CD0056c	N2	Cisplatin	50	I	IV	3903824	3903824	3903827	3	TCC	1	GGAGTCTCGC	F56D6.6	+
CD0056c	N2	Cisplatin	50	D	III	1893407	1893403	1893411	3	tgc	1	GAGGTGCTGCTCGCG	B0524.5	-
CD0056c	N2	Cisplatin	50	D	III	2491080	2491079	2491124	31	aattt<21>atcgg	1	TCGAAATTTTTCGTATTTTTTACTGAAAAAATCGGAATTTTTCGTATTATTT	Y54F10AL.1	+
CD0056c	N2	Cisplatin	50	D	I	10540895	10540894	10540919	19	tcttt<9>agcat	1	ATCATCTTTACTTTTCCCAGCATTCTTTTCAC	No_gene	No_gene
CD0056c	N2	Cisplatin	50	D	I	13881181	13881180	13881184	3	cgc	1	AAATCGCTTTT	W04A8.7	+
CD0056c	N2	Cisplatin	50	D	V	1869257	1869256	1869281	20	gctct<10>cgtcg	1	CCGCGCTCTTCGCATCACCCGTCGGCTCATCA	T10B5.6	+
CD0056c	N2	Cisplatin	50	D	V	15759914	15759913	15759925	11	ttggaaatgag	1	AGACTTGGAAATGAGCTTC	F57A10.1	+
CD0056c	N2	Cisplatin	50	D	X	7550373	7550372	7550380	3	ctg	1	GTGCCTGCTGCAGGT	F46C8.1	+
CD0056d	N2	Cisplatin	50	I	V	10111932	10111932	10111933	1	T	1	GGGGGTTG	C08B6.3	-
CD0056d	N2	Cisplatin	50	D	X	16792089	16792088	16792103	12	tccgcagctgga	1	GGCGTCCGCAGCTGGATCACCA	T01C8.5	-
CD0056d	N2	Cisplatin	50	D	IV	10476530	10476529	10476538	6	ttaggc	1	ATTTTTAGGCTTTATT	F01D4.9	+
CD0056d	N2	Cisplatin	50	I	IV	9834471	9834471	9834472	4	AAAA	1	TGAGCCCT	W08D2.8	+
CD0057a	fan-1	Cisplatin	50	D	I	886574	886573	886583	6	cggcta	1	GCGTCGGCTACGGGACA	Y95B8A.6	+
CD0057a	fan-1	Cisplatin	50	D	I	10795147	10795146	10795152	3	agc	1	TGGTAGCAGACAC	F55A3.2	+
CD0057a	fan-1	Cisplatin	50	D	II	2422781	2422780	2422810	26	gaagt<16>tctca	1	TTTTGAAGTCGCGATTTTGAAGTCATCTCAGAAAATG	F42G2.2	+
CD0057a	fan-1	Cisplatin	50	D	II	9352974	9352973	9352984	9	agcttactt	1	CTGCAGCTTACTTATATT	F42A8.3	+
CD0057a	fan-1	Cisplatin	50	D	III	12445932	12445931	12445940	4	cttg	1	AGCACTTGCTTGACTC	Y49E10.18	-
CD0057a	fan-1	Cisplatin	50	D	V	17812246	17812245	17812254	4	cgcc	1	ACCACGCCCGCCACAC	Y94A7B.4	+
CD0057a	fan-1	Cisplatin	50	D	IV	8751053	8751052	8751058	5	ctctc	1	ACAGCTCTCTGTA	F20C5.1	+
CD0057a	fan-1	Cisplatin	50	D	X	6907004	6907003	6907010	5	caatg	1	ATTCCAATGCTTCT	No_gene	No_gene
CD0057a	fan-1	Cisplatin	50	D	X	8051909	8051908	8051917	7	cggtaag	1	TTACCGGTAAGCTTCA	C18A11.7	-
CD0057a	fan-1	Cisplatin	50	D	X	15243345	15243344	15243350	5	ttcag	1	AACTTTCAGCTCA	F39B1.1	-
CD0057c	fan-1	Cisplatin	50	D	III	305460	305459	305462	1	g	1	GTGTGGAATA	Y50D7A.1	+
CD0057c	fan-1	Cisplatin	50	D	III	7048726	7048725	7048737	8	aaccaggc	1	CTGGAACCAGGCAACACGT	No_gene	No_gene
CD0057c	fan-1	Cisplatin	50	D	II	10552895	10552894	10552906	11	agagtttaact	1	AAAAAGAGTTTAACTGTCG	R166.5	-
CD0057c	fan-1	Cisplatin	50	D	IV	17487740	17487739	17487744	3	gct	1	TTGAGCTGACTT	4R79.1	-
CD0057c	fan-1	Cisplatin	50	D	V	1052739	1052738	1052779	6	aagcct	1	CGCCAAGCCTAAGCCTAAGCCTAAGCCTAAGCCTAAGCCTAAGCTTAA	K10C9.4	-
CD0057c	fan-1	Cisplatin	50	D	X	2117155	2117154	2117165	6	gcttct	1	CTGGGCTTCTGCTTTTTT	F53B1.6	-
CD0057c	fan-1	Cisplatin	50	D	X	15624522	15624521	15624529	7	tggccgg	1	TTTTTGGCCGGCTAC	K09E9.1	+
CD0057c	fan-1	Cisplatin	50	I	X	10811149	10811149	10811151	16	GGAAAAGCTCGGAAAA	1	GCTCGAGCT	F31B12.1	-
CD0057c	fan-1	Cisplatin	50	I	X	17397442	17397442	17397443	2	AT	1	AAAGCTAT	F11C7.2	+
CD0057d	fan-1	Cisplatin	50	D	I	11690397	11690396	11690404	6	cgtgag	1	GCTCCGTGAGCTTAC	T22H2.5	-
CD0057d	fan-1	Cisplatin	50	D	IV	1028047	1028046	1028060	9	cttctgaag	1	GAATCTTCTGAAGCTTCACTT	Y55F3AM.10	-
CD0057d	fan-1	Cisplatin	50	D	IV	7974401	7974400	7974404	3	tgg	1	AATATGGCTGC	No_gene	No_gene
CD0057d	fan-1	Cisplatin	50	I	IV	1986439	1986439	1986440	18	TGAAAAACGAAAAAAAAA	1	AATGCGTC	Y76B12C.6	+
CD0057d	fan-1	Cisplatin	50	D	III	3396061	3396060	3396064	3	ctt	1	GCTGCTTTTTC	No_gene	No_gene
CD0057d	fan-1	Cisplatin	50	D	V	17498288	17498287	17498299	8	ctcgtgag	1	GGAACTCGTGAGCTCCAAA	K03D7.4	+
CD0057d	fan-1	Cisplatin	50	DI	V	9223632	9223632	9223649	18	T	1	CTCAAGGATATGAGGAGGAAGCTG	T18H9.1	+
CD0057d	fan-1	Cisplatin	50	D	X	595428	595427	595443	14	gctgg<4>ttttg	1	TGTAGCTGGAAGATTTTGGACGT	F13C5.2	+
CD0057d	fan-1	Cisplatin	50	D	X	3402966	3402965	3402969	3	cat	1	TAAGCATACAG	No_gene	No_gene
CD0058a	fcd-2	Cisplatin	50	D	II	6819393	6819392	6819395	2	gc	1	GGTTGCTAGA	No_gene	No_gene
CD0058a	fcd-2	Cisplatin	50	D	II	11609031	11609030	11609041	7	gctgaag	1	TGAAGCTGAAGGCTTGTG	F07A11.4	+
CD0058a	fcd-2	Cisplatin	50	D	II	13102708	13102707	13102720	7	gattcga	1	AATCGATTCGAGATTCTCGT	F29C12.3	-
CD0058a	fcd-2	Cisplatin	50	D	III	1100426	1100425	1100439	12	gctagcacctgt	1	GCTAGCTAGCACCTGTGAGCC	No_gene	No_gene
CD0058a	fcd-2	Cisplatin	50	D	III	7267502	7267501	7267508	5	aaagc	1	AATTAAAGCATGTC	B0361.4	+
CD0058a	fcd-2	Cisplatin	50	DI	V	19608890	19608890	19608894	5	T	1	CAGCTTTGTCT	No_gene	No_gene
CD0058c	fcd-2	Cisplatin	50	D	I	11654304	11654303	11654319	12	aagtgctaatgt	1	TGTAAAGTGCTAATGTAAGCTTT	No_gene	No_gene
CD0058c	fcd-2	Cisplatin	50	D	IV	7528758	7528757	7528765	5	cagct	1	TTGACAGCTCATATC	No_gene	No_gene
CD0058c	fcd-2	Cisplatin	50	DI	IV	9136018	9136018	9136068	51	AGTTTTTGCTTCTTTAGTTTTTGTTACAAT	1	TGCCTATGATTCTTTTGGTATTTTTAGCATTGTTTGTTATCACACGCATAAGTAGCA	No_gene	No_gene
CD0058c	fcd-2	Cisplatin	50	D	II	1690789	1690788	1690850	61	tcaac<51>aaccg	1	CATATCAACTGCGCAATATTCATCCAAATCTAACCTTATCGGATGTAAGTGATCTTCGACAACCGCTAC	F58E1.10	-
CD0058c	fcd-2	Cisplatin	50	D	II	5455073	5455072	5455081	7	agctgcc	1	TCAAAGCTGCCATTCA	F56D1.5	+
CD0058c	fcd-2	Cisplatin	50	D	V	1576763	1576762	1576852	86	aaaat<76>tcgag	1	GTCAAAAATTGTTGCGCAAAAGTTGCGTCGTTATAAAATTGCGCCATCGCCCTCCAAACAGGCGGTCTTTTGAATATGAAGCTCGTCGAGAAACCCG	No_gene	No_gene
CD0058c	fcd-2	Cisplatin	50	D	V	12468215	12468214	12468224	7	cggcttc	1	TGTGCGGCTTCCGCCCC	No_gene	No_gene
CD0058c	fcd-2	Cisplatin	50	D	X	12977990	12977989	12977993	3	gag	1	CCTCGAGCCGA	No_gene	No_gene
CD0058d	fcd-2	Cisplatin	50	D	II	2086931	2086930	2086934	1	c	1	GTATCCCGATG	T16A1.7	-
CD0058d	fcd-2	Cisplatin	50	D	IV	7742889	7742888	7742901	9	aattggctc	1	TAGTAATTGGCTCAATATAG	No_gene	No_gene
CD0058d	fcd-2	Cisplatin	50	D	I	11492526	11492525	11492532	4	tgct	1	TGGGTGCTTGTTCC	K08C9.10	-
CD0058d	fcd-2	Cisplatin	50	D	X	12529797	12529796	12529810	10	tggcaatggc	1	TGTATGGCAATGGCTGGACAA	No_gene	No_gene
CD0058d	fcd-2	Cisplatin	50	D	V	1320918	1320917	1320928	10	ttgatgagcc	1	ATTTTTGATGAGCCAGAG	No_gene	No_gene
CD0059a	lig-4; fcd-2	Cisplatin	50	I	I	13801981	13801981	13801986	1	T	1	TGGGTTTTCGGG	W09G3.7	-
CD0059a	lig-4; fcd-2	Cisplatin	50	D	X	2030781	2030780	2030807	24	ttgat<14>tgctc	1	AAATTTGATTAAAAAAACGACAGTGCTCTTCCAA	Y102A11A.2	+
CD0059a	lig-4; fcd-2	Cisplatin	50	D	X	11484800	11484799	11484806	5	gctta	1	TATTGCTTAGGATT	No_gene	No_gene
CD0059c	lig-4; fcd-2	Cisplatin	50	D	III	385599	385598	385630	29	ttggc<19>caaaa	1	CAAGTTGGCGCCATATGCCGATCAGCTACAAAATTCAAA	No_gene	No_gene
CD0059c	lig-4; fcd-2	Cisplatin	50	D	III	2467041	2467040	2467049	7	ttgaagc	1	CTATTTGAAGCTGTAA	No_gene	No_gene
CD0059c	lig-4; fcd-2	Cisplatin	50	D	V	2339723	2339722	2339733	9	tccccaggc	1	TCGGTCCCCAGGCTGATT	F15E11.4	-
CD0059c	lig-4; fcd-2	Cisplatin	50	D	V	3416212	3416211	3416227	13	aaatcgggagctc	1	ACCAAAATCGGGAGCTCAATCAG	T20D4.4	+
CD0059c	lig-4; fcd-2	Cisplatin	50	D	X	471588	471587	471604	15	tcacg<5>gttaa	1	ACTTTCACGGCGGCGTTAATACTC	No_gene	No_gene
CD0059d	lig-4; fcd-2	Cisplatin	50	DI	II	10100896	10100896	10100906	11	TCT	1	CTTCTGAGCCAGCAGAC	ZK945.3	+
CD0059d	lig-4; fcd-2	Cisplatin	50	D	I	8086114	8086113	8086130	16	ggaca<6>ataag	1	CTATGGACAAACGGAATAAGCGCT	F18C12.2	+
CD0059d	lig-4; fcd-2	Cisplatin	50	D	IV	16998637	16998636	16998645	8	aaaatgct	1	GTAAAAAATGCTGAAA	Y116A8C.16	+
CD0059d	lig-4; fcd-2	Cisplatin	50	I	IV	16253564	16253564	16253566	1	T	1	TTGATAAAT	No_gene	No_gene
CD0059d	lig-4; fcd-2	Cisplatin	50	I	III	5729398	5729397	5729399	6	TGCATG	1	CGAAGCTCG	B0244.8	+
CD0059d	lig-4; fcd-2	Cisplatin	50	D	V	7044215	7044214	7044221	4	tcaa	1	CTTCTCAATCTTTC	No_gene	No_gene
CD0059d	lig-4; fcd-2	Cisplatin	50	D	V	16248202	16248201	16248206	3	gct	1	GTCAGCTGTATT	F21H7.11	+
CD0059d	lig-4; fcd-2	Cisplatin	50	I	V	17570464	17570464	17570469	16	AAAGAAACCCCCATGA	1	TCCGAAAGCCGT	C38D9.2	+
CD0060a	lig-4	Cisplatin	50	D	V	2844914	2844913	2844930	10	gagctctgag	1	ATTAGAGCTCTGAGGAGCTCAAAT	T03D3.11	-
CD0060a	lig-4	Cisplatin	50	D	X	5451207	5451206	5451217	9	ttaaaagtc	1	AAGATTAAAAGTCTCACG	C25F6.23	+
CD0060c	lig-4	Cisplatin	50	D	II	2941437	2941436	2941532	95	agagt<85>aaact	1	GGGGAGAGTGTGCTGCGTCTCCCCTCCTCCCACACTCCCTCGCGTATTGTCTTTAAAACGGCATAACTCAGCAACGAGAAGAGCTATCAACTTGAAACTTTTT	T11F1.7	-
CD0060c	lig-4	Cisplatin	50	D	II	10196623	10196622	10196633	7	tgcttca	1	GTATTGCTTCATGCGTCA	R05H5.6	+
CD0060c	lig-4	Cisplatin	50	D	IV	1016308	1016307	1016322	11	aaaacgctccg	1	ATTAAAAACGCTCCGAAATTAG	Y55F3AM.3	+
CD0060c	lig-4	Cisplatin	50	D	X	16081748	16081747	16081752	3	cag	1	GAGACAGCCTGT	C30F2.2	-
CD0060d	lig-4	Cisplatin	50	D	V	5089956	5089955	5089986	28	agaag<18>tcacg	1	AATAAGAAGATCGGAGCTCAGTATGTGTCACGAGGTAC	No_gene	No_gene
CD0060d	lig-4	Cisplatin	50	D	V	19001355	19001354	19001361	5	ggctg	1	TATCGGCTGGCTCG	Y39B6A.34	+
CD0060d	lig-4	Cisplatin	50	D	X	13367740	13367739	13367744	3	gct	1	GAAAGCTGAATA	No_gene	No_gene
CD0060d	lig-4	Cisplatin	50	I	X	3516970	3516970	3516972	2	AT	1	TTTGAAAAT	No_gene	No_gene
CD0060d	lig-4	Cisplatin	50	DI	III	5505694	5505694	5505734	41	CATCTAATGAGTGTGTGTGTGTCTGCAATTGGCCA	1	AACTCCGTGTTAATCAAGCAAGCCGCCACCATCTAATGAGTGTGTGT	R02F2.1	+
CD0061a	mus-81	Cisplatin	50	DI	V	6428174	6428174	6428195	22	AAAACTACGGAAAAAAAAAAA	1	AAATTAATGCGATTAGGTATCGAAGGTT	T05H4.13	-
CD0061c	mus-81	Cisplatin	50	D	II	982906	982905	982910	3	cag	1	GTTTCAGCTTCT	No_gene	No_gene
CD0062c	polq-1	Cisplatin	50	D	IV	5772503	5772502	5772506	1	g	1	GGAAGGGCTAC	No_gene	No_gene
CD0062c	polq-1	Cisplatin	50	D	X	15900506	15900505	15900507	1	g	1	GCCAGTTTT	No_gene	No_gene
CD0062d	polq-1	Cisplatin	50	I	V	2288030	2288030	2288038	1	A	1	CCCTAAAAAAATACG	T27B7.2	-
CD0063a	slx-1	Cisplatin	50	D	II	4006036	4006035	4006041	4	ccaa	1	CCAGCCAACAATA	K07D4.7	+
CD0063a	slx-1	Cisplatin	50	D	II	11145063	11145062	11145075	10	cccaggctct	1	TTTGCCCAGGCTCTCCAACG	F40F8.8	+
CD0063a	slx-1	Cisplatin	50	I	II	14348640	14348640	14348647	3	TCT	1	CCAGTCTTCTGAAC	Y54G11A.10	-
CD0063a	slx-1	Cisplatin	50	I	IV	4907567	4907567	4907569	19	GAAAGTTAGTTTTACTTTT	1	TTTAGCCTA	T08B6.4	+
CD0063a	slx-1	Cisplatin	50	D	V	17864853	17864852	17864861	7	gcttccg	1	AGAAGCTTCCGGAATG	Y59A8A.1	-
CD0063a	slx-1	Cisplatin	50	D	X	2469604	2469603	2469632	26	tcgag<16>agtgt	1	TATGTCGAGCTTTGGTTCACTTCCGAGTGTTCTTGC	R04B3.1	-
CD0063c	slx-1	Cisplatin	50	D	I	7392100	7392099	7392179	77	ctttt<67>ttttg	1	CACCCTTTTTCTCCTTCTTTAAGCTTCTCCTCCTTCCATTTTTCTGCTCCTCCTTCTCCTCCCCCTAACCCCCTTCTTTTGCTCTTC	C15A11.3	-
CD0063c	slx-1	Cisplatin	50	DI	I	12100405	12100405	12100418	14	GTA	1	CGCCAAAGCCAAAGCCTAAG	M01G12.12	-
CD0063c	slx-1	Cisplatin	50	D	V	3198101	3198100	3198109	5	ggctt	1	AAGAGGCTTGGCACAG	Y73C8B.5	+
CD0063d	slx-1	Cisplatin	50	DI	I	11547705	11547705	11547717	13	TTTTTTT	1	TTTGCCTATGAATCACAAG	F15D3.1	-
CD0063d	slx-1	Cisplatin	50	D	II	7167792	7167791	7167800	5	agccc	1	GGTAAGCCCAGCAATT	C27H5.5	-
CD0063d	slx-1	Cisplatin	50	D	IV	7802559	7802558	7802561	1	g	1	TTCAGGCTTC	C33H5.16	-
CD0063d	slx-1	Cisplatin	50	I	V	17785555	17785555	17785556	1	T	1	TTTGGGGC	No_gene	No_gene
CD0064a	xpf-1	Cisplatin	50	D	I	12147861	12147860	12147865	3	gct	1	TATGGCTGAGTA	No_gene	No_gene
CD0064a	xpf-1	Cisplatin	50	DI	I	8377503	8377503	8377505	3	T	1	AGAAGCTTT	F16D3.6	+
CD0064a	xpf-1	Cisplatin	50	I	I	12947047	12947047	12947048	1	T	1	AGGGGGGC	F08A8.3	+
CD0064a	xpf-1	Cisplatin	50	D	II	597838	597837	597843	3	agc	1	TCTGAGCAGGCGC	W04H10.3	-
CD0064a	xpf-1	Cisplatin	50	D	II	2923063	2923062	2923068	4	agct	1	GTGGAGCTATCGA	No_gene	No_gene
CD0064a	xpf-1	Cisplatin	50	D	II	4841704	4841703	4841712	7	gcagctt	1	AGCAGCAGCTTGAGGC	T23B7.2	-
CD0064a	xpf-1	Cisplatin	50	I	II	3622447	3622447	3622450	1	A	1	CCCCAACCAT	M151.7	+
CD0064a	xpf-1	Cisplatin	50	D	III	2928445	2928444	2928454	7	ggctatc	1	CAGAGGCTATCGGTGAT	R10F2.1	+
CD0064a	xpf-1	Cisplatin	50	D	III	5208909	5208908	5208914	4	ccag	1	TTATCCAGCGAAC	ZC155.7	-
CD0064a	xpf-1	Cisplatin	50	D	IV	152429	152428	152434	5	ttggc	1	AATTTTGGCAGAA	No_gene	No_gene
CD0064a	xpf-1	Cisplatin	50	D	IV	4253335	4253334	4253340	4	cagg	1	CCAACAGGCTATT	F36A4.7	+
CD0064a	xpf-1	Cisplatin	50	D	IV	10862624	10862623	10862629	3	cag	1	AGCTCAGCAAGTT	T11G6.8	+
CD0064a	xpf-1	Cisplatin	50	D	IV	11725167	11725166	11725180	11	gatagctcgcc	1	TTTTGATAGCTCGCCGACACG	K01A6.2	+
CD0064a	xpf-1	Cisplatin	50	D	IV	16377367	16377366	16377369	2	gc	1	GATTGCTCAG	No_gene	No_gene
CD0064a	xpf-1	Cisplatin	50	DI	IV	2691567	2691567	2691570	4	A	1	TTTGGCTAAT	Y94H6A.5	-
CD0064a	xpf-1	Cisplatin	50	I	IV	16981392	16981391	16981396	6	TTTTTT	1	ACAATTTTCAGC	No_gene	No_gene
CD0064a	xpf-1	Cisplatin	50	D	V	6043746	6043745	6043751	5	attgg	1	TAACATTGGCTGG	No_gene	No_gene
CD0064a	xpf-1	Cisplatin	50	D	V	7219940	7219939	7219944	3	gcc	1	TAAAGCCGTCTT	C13F10.6	-
CD0064a	xpf-1	Cisplatin	50	D	V	13045832	13045831	13045879	47	ctaat<37>acgtt	1	TTCCCTAATCCACTTGTCACCCTTGTCGCCGGCCTTGTGCTTCCTCACGTTTAGA	W07G4.4	+
CD0064a	xpf-1	Cisplatin	50	D	V	15036324	15036323	15036345	17	cttgc<7>accag	1	TCCACTTGCTCCGGCCACCAGCTTGATCT	C25D7.1	-
CD0064a	xpf-1	Cisplatin	50	D	V	18848946	18848945	18848949	2	cg	1	TTTACGCTGAT	Y17D7A.1	+
CD0064a	xpf-1	Cisplatin	50	D	X	5889293	5889292	5889301	6	cattag	1	ATTCCATTAGCACCTA	No_gene	No_gene
CD0064a	xpf-1	Cisplatin	50	D	X	16443036	16443035	16443047	8	caagctgg	1	TTGTCAAGCTGGCAAAATA	No_gene	No_gene
CD0064a	xpf-1	Cisplatin	50	I	X	3017148	3017148	3017149	6	AACCAT	1	CCAGCTCC	Y48D7A.2	-
CD0064c	xpf-1	Cisplatin	50	D	I	3159093	3159092	3159098	4	agct	1	CCGCAGCTATACC	Y54E10A.9	-
CD0064c	xpf-1	Cisplatin	50	I	I	12645022	12645019	12645023	6	TGACTT	1	ACAGCTTATAT	No_gene	No_gene
CD0064c	xpf-1	Cisplatin	50	D	II	8250481	8250480	8250489	8	cggagctg	1	GCCTCGGAGCTGAAAC	F35C11.4	+
CD0064c	xpf-1	Cisplatin	50	DI	II	9995038	9995038	9995088	51	TGTATTTT	1	GTGCATGCATCATTTCCACCGAACTTGTTTTTTTAAATGTATAGATCAATTTGGTTA	ZK892.1	+
CD0064c	xpf-1	Cisplatin	50	D	IV	9499195	9499194	9499204	6	agctag	1	CTCAAGCTAGAGCGAAA	C33A12.10	+
CD0064c	xpf-1	Cisplatin	50	D	V	2272737	2272736	2272767	24	ttgct<14>gctgg	1	GACATTGCTGACATTGTGGAGCAGCTGGTTGCTGGCAT	Y5H2A.4	-
CD0064c	xpf-1	Cisplatin	50	D	V	10844992	10844991	10845000	7	ggctttt	1	AGGCGGCTTTTGAATG	C29A12.4	+
CD0064c	xpf-1	Cisplatin	50	D	V	12715043	12715042	12715045	2	ct	1	ATAGCTACAG	R11D1.5	-
CD0064c	xpf-1	Cisplatin	50	D	V	19557639	19557638	19557661	19	tctgc<9>gaacc	1	ACCTTCTGCGTCATAGCCGAACCTCTACCC	B0399.t16	-
CD0064c	xpf-1	Cisplatin	50	I	V	9661197	9661197	9661198	1	T	1	AGGGGAGT	B0331.2	-
CD0064d	xpf-1	Cisplatin	50	DI	I	6319946	6319946	6319950	5	TGA	1	TATCCTGCTTG	F26B1.2	+
CD0064d	xpf-1	Cisplatin	50	D	X	3538346	3538345	3538350	3	cag	1	ATGACAGCTGGA	F56B6.4	+
CD0064d	xpf-1	Cisplatin	50	D	II	488342	488341	488345	1	c	1	TTTTCCCGTCA	W07E6.4	+
CD0064d	xpf-1	Cisplatin	50	D	II	727011	727010	727027	16	aagga<6>gctgc	1	GGATAAGGAGAAGCCGCTGCCAGT	Y39F10B.1	+
CD0064d	xpf-1	Cisplatin	50	D	II	15255156	15255155	15255218	58	ttagg<48>taggc	1	AGATTTAGGCTAGGTCTAGGCTAGGCTCAGGCTTAGGCTTAAATTTAGACTTAGGCTTAGGCTTAGACTT	No_gene	No_gene
CD0064d	xpf-1	Cisplatin	50	D	IV	761043	761042	761046	1	a	1	TCTGAAACGTT	F56B3.10	+
CD0064d	xpf-1	Cisplatin	50	D	IV	12706523	12706522	12706532	8	cggctgtt	1	ATGGCGGCTGTTCTCGT	C27D8.4	+
CD0064d	xpf-1	Cisplatin	50	I	III	5415582	5415582	5415583	1	A	1	AAACCAAA	No_gene	No_gene
CD0064d	xpf-1	Cisplatin	50	D	V	9764367	9764366	9764369	2	gg	1	AGAAGGCAGA	No_gene	No_gene
CD0064d	xpf-1	Cisplatin	50	D	V	18235911	18235910	18235922	8	ccggagct	1	TACACCGGAGCTCCGAATC	R10E8.7	+

## Sheet: Supplementary table 5
Supplementary table 5. Genomic rearrangements identified in this study.
ID	Genotype	Experiment	Concentration (_M)	Type	Chr	Position	Strand	Chr	Position	Strand	Microhomology	Non-templated sequence	Size (bp)
CD0001c	N2	20 generation	0	Tandem duplication	II	14962394	-	II	14965329	-	CGA	--	2935
CD0001d	N2	20 generation	0	Deletion	II	13542653	+	II	13561629	+	A	--	18976
CD0004a	xpa-1	20 generation	0	Deletion	V	9217458	+	V	9217804	+	--	CAA	346
CD0005a	fcd-2	20 generation	0	Inverted orientation	IV	14917236	-	IV	14919874	+	AGT	--	2638
CD0006c	lig-4	20 generation	0	Deletion	IV	1330800	+	IV	1338369	+	TTTT	--	7569
CD0006d	lig-4	20 generation	0	Deletion	I	14943480	+	I	14945477	+	T	--	1997
CD0008d	trt-1	20 generation	0	Inverted orientation	III	4639806	+	III	4647085	-	--	--	7279
CD0008d	trt-1	20 generation	0	Inverted orientation	III	4646904	-	III	4647082	+	--	--	178
CD0008e	trt-1	20 generation	0	Tandem duplication	I	13550026	-	I	13550371	-	ATTTTTCAGTGCAAATTCTCTCCGAAACACCAGAAGACGAGTCAA	--	345
CD0009c	mrt-2	20 generation	0	Deletion	I	3434418	+	I	3434624	+	TTGCGCA	--	206
CD0009f	mrt-2	20 generation	0	Deletion	V	11880447	+	V	11881871	+	T	--	1424
CD0009f	mrt-2	20 generation	0	Deletion	V	3952642	+	V	3953710	+	--	AATT	1068
CD0009f	mrt-2	20 generation	0	Inverted orientation	V	12321005	-	V	15849406	+	--	GAAGAAGAAACTGAGTTTTCAATAGAAAAATGT	3528401
CD0009f	mrt-2	20 generation	0	Translocation	V	12326672	+	X	17669231	+	CT	--	NA
CD0009f	mrt-2	20 generation	0	Inverted orientation	III	13768913	-	III	13771817	+	--	AA	2904
CD0009f	mrt-2	20 generation	0	Inverted orientation	III	13775115	+	III	13777633	-	--	TACATCTGGTGCAGC	2518
CD0009f	mrt-2	20 generation	0	Inverted orientation	II	15245861	-	II	15252212	+	--	TT	6351
CD0009f	mrt-2	20 generation	0	Inverted orientation	II	15262429	+	II	15263824	-	A	--	1395
CD0009f	mrt-2	20 generation	0	Tandem duplication	V	15326962	-	V	15381280	-	C	--	54318
CD0009f	mrt-2	20 generation	0	Inverted orientation	V	15328003	+	V	16697225	-	CA	--	1369222
CD0009f	mrt-2	20 generation	0	Tandem duplication	V	15331636	-	V	15965122	-	--	CTGATTCTTTTTGCATTTAATTTTGCTGATTCTTTTTGCAT	633486
CD0009f	mrt-2	20 generation	0	Inverted orientation	V	16694447	-	V	16694981	+	--	--	534
CD0009f	mrt-2	20 generation	0	Inverted orientation	X	17674848	+	X	17675220	-	AT	--	372
CD0009f	mrt-2	20 generation	0	Deletion	V	18430791	+	V	18490388	+	--	--	59597
CD0009f	mrt-2	20 generation	0	Tandem duplication	V	20917416	-	V	20922100	-	--	--	4684
CD0009h	mrt-2	20 generation	0	Inverted orientation	V	20866433	-	V	20882736	+	TC	--	16303
CD0009h	mrt-2	20 generation	0	Inverted orientation	V	20874544	-	V	20903462	+	AAT	--	28918
CD0009h	mrt-2	20 generation	0	Inverted orientation	V	20874733	+	V	20875766	-	--	--	1033
CD0009h	mrt-2	20 generation	0	Inverted orientation	V	20893536	-	V	20893711	+	--	TTT	175
CD0009h	mrt-2	20 generation	0	Inverted orientation	V	20901051	+	V	20901620	-	--	GTATACAA	569
CD0009h	mrt-2	20 generation	0	Inverted orientation	V	20910778	+	V	20912247	-	AAAAAA	--	1469
CD0031a	ced-4	20 generation	0	Tandem duplication	I	13721281	-	I	13723465	-	AG	--	2184
CD0015d	polq-1	Aflatoxin	0	Deletion	V	725495	+	V	764836	+	--	--	39341
CD0017c	xpa-1	Aflatoxin	0.3	Deletion	III	11999659	+	III	11999806	+	--	--	147
CD0017c	xpa-1	Aflatoxin	0.3	Deletion	X	13916067	+	X	13916570	+	C	--	503
CD0019c	xpc-1	Aflatoxin	0.3	Deletion	III	3226050	+	III	3226205	+	--	T	155
CD0019c	xpc-1	Aflatoxin	0.3	Deletion	III	7348754	+	III	7349175	+	--	--	421
CD0020d	xpf-1	Aflatoxin	0.3	Deletion	IV	1814184	+	IV	1814413	+	--	ATAAT	229
CD0021d	polq-1	Aflatoxin	0.3	Deletion	I	6858851	+	I	6878992	+	--	--	20141
CD0022a	N2	Aflatoxin	3	Deletion	V	19611296	+	V	19611574	+	T	--	278
CD0022d	N2	Aflatoxin	3	Deletion	I	6989640	+	I	6989754	+	GT	--	114
CD0023a	xpa-1	Aflatoxin	3	Deletion	I	2793086	+	I	2793341	+	--	AAA	255
CD0023d	xpa-1	Aflatoxin	3	Deletion	III	12512508	+	III	12512610	+	AA	--	102
CD0023d	xpa-1	Aflatoxin	3	Deletion	IV	13457401	+	IV	13457564	+	--	AAAATAAAGAAAGTTGCCA	163
CD0024a	csb-1	Aflatoxin	3	Deletion	I	6327878	+	I	6328027	+	C	--	149
CD0024a	csb-1	Aflatoxin	3	Deletion	II	6641754	+	II	6641871	+	--	GTATTT	117
CD0024d	csb-1	Aflatoxin	3	Deletion	I	8441490	+	I	8441667	+	--	--	177
CD0025d	xpc-1	Aflatoxin	3	Deletion	I	3934954	+	I	3935188	+	CGGC	--	234
CD0026a	xpf-1	Aflatoxin	3	Deletion	II	11491487	+	II	11491658	+	--	TCTCATTTCTACAGTTCC	171
CD0026a	xpf-1	Aflatoxin	3	Deletion	IV	7522584	+	IV	7522901	+	A	--	317
CD0026a	xpf-1	Aflatoxin	3	Tandem duplication	V	18756911	-	V	18768286	-	TCA	--	11375
CD0026a	xpf-1	Aflatoxin	3	Deletion	X	10567618	+	X	10567943	+	GC	--	325
CD0033c	fan-1	Mechlorethamine	0	Deletion	III	12925014	+	III	12925202	+	GGTT	--	188
CD0033c	fan-1	Mechlorethamine	0	Deletion	IV	15767923	+	IV	15768129	+	GC	--	206
CD0033d	fan-1	Mechlorethamine	0	Deletion	IV	6550128	+	IV	6550540	+	--	--	412
CD0035a	N2	Mechlorethamine	20	Deletion	III	13283071	+	III	13290970	+	--	--	7899
CD0035a	N2	Mechlorethamine	20	Inverted orientation	X	5084598	+	X	6501811	-	--	CA	1417213
CD0035a	N2	Mechlorethamine	20	Inverted orientation	X	5084600	-	X	6501820	+	GAC	--	1417220
CD0035a	N2	Mechlorethamine	20	Tandem duplication	X	6497546	-	X	6876700	-	C	--	379154
CD0035a	N2	Mechlorethamine	20	Deletion	X	6499980	+	X	6501280	+	--	AA	1300
CD0035a	N2	Mechlorethamine	20	Deletion	X	6873575	+	X	6873750	+	--	GTCACGGAGGAAGTCATG	175
CD0035c	N2	Mechlorethamine	20	Tandem duplication	X	1971900	-	X	1973311	-	CGCACTATGCG	--	1411
CD0035c	N2	Mechlorethamine	20	Deletion	X	13063117	+	X	13066106	+	TTAAAAA	--	2989
CD0035d	N2	Mechlorethamine	20	Tandem duplication	I	3660657	-	I	3664157	-	AC	--	3500
CD0035d	N2	Mechlorethamine	20	Deletion	IV	57337	+	IV	57483	+	AAG	--	146
CD0035d	N2	Mechlorethamine	20	Inverted orientation	V	2799280	-	V	2800706	+	--	TTCCAACTCCG	1426
CD0035d	N2	Mechlorethamine	20	Translocation	V	2802491	+	X	17582726	+	--	T	NA
CD0035d	N2	Mechlorethamine	20	Inverted orientation	V	2805875	+	V	2806301	-	C	--	426
CD0035d	N2	Mechlorethamine	20	Inverted orientation	V	2806000	-	V	2817500	+	NA	NA	11500
CD0035d	N2	Mechlorethamine	20	Inverted orientation	V	2811787	+	V	2812200	-	AG	--	413
CD0035d	N2	Mechlorethamine	20	Inverted orientation	V	2818454	+	V	2818691	-	--	ATGCCGCACTAATTTCCG	237
CD0035d	N2	Mechlorethamine	20	Deletion	V	4552976	+	V	4553133	+	GTGCCA	--	157
CD0035d	N2	Mechlorethamine	20	Inverted orientation	X	17592000	+	X	17592100	-	NA	NA	100
CD0036a	fan-1	Mechlorethamine	20	Translocation	I	6931221	+	V	15432659	-	T	--	NA
CD0036a	fan-1	Mechlorethamine	20	Tandem duplication	I	6931410	-	I	6943057	-	--	--	11647
CD0036a	fan-1	Mechlorethamine	20	Translocation	I	6942237	-	V	15620220	-	T	--	NA
CD0036a	fan-1	Mechlorethamine	20	Deletion	II	10825809	+	II	10826897	+	TCGA	--	1088
CD0036a	fan-1	Mechlorethamine	20	Tandem duplication	IV	4503791	-	IV	5115962	-	--	--	612171
CD0036a	fan-1	Mechlorethamine	20	Deletion	V	1923818	+	V	4281476	+	A	--	2357658
CD0036a	fan-1	Mechlorethamine	20	Inverted orientation	V	15618896	-	V	15618899	+	--	--	3
CD0036c	fan-1	Mechlorethamine	20	Tandem duplication	I	13493979	-	I	14691651	-	--	ATATGAGTAGACGAGAGGAAA	1197672
CD0036c	fan-1	Mechlorethamine	20	Deletion	I	13495723	+	I	14691656	+	TG	--	1195933
CD0036c	fan-1	Mechlorethamine	20	Translocation	II	12816164	-	V	12299272	-	G	--	NA
CD0036c	fan-1	Mechlorethamine	20	Translocation	II	12823603	+	V	12300774	+	--	TTTT	NA
CD0036c	fan-1	Mechlorethamine	20	Deletion	V	9069674	+	V	9073256	+	--	--	3582
CD0036c	fan-1	Mechlorethamine	20	Tandem duplication	V	9073740	-	V	9074298	-	--	--	558
CD0036d	fan-1	Mechlorethamine	20	Tandem duplication	I	9172914	-	I	9178579	-	AA	--	5665
CD0036d	fan-1	Mechlorethamine	20	Inverted orientation	I	9179065	+	I	14291757	-	--	TCCACCACCACCACCACATTATTATG	5112692
CD0036d	fan-1	Mechlorethamine	20	Inverted orientation	I	9179812	-	I	9179886	+	A	--	74
CD0036d	fan-1	Mechlorethamine	20	Deletion	I	9187064	+	I	13348292	+	TG	--	4161228
CD0036d	fan-1	Mechlorethamine	20	Deletion	I	13353123	+	I	13353818	+	--	TCCACCACCACCACCACATTATTATG	695
CD0036d	fan-1	Mechlorethamine	20	Deletion	I	13353151	+	I	14291762	+	ACCA	--	938611
CD0037a	fcd-2	Mechlorethamine	20	Tandem duplication	IV	3464835	-	IV	3492151	-	T	--	27316
CD0037a	fcd-2	Mechlorethamine	20	Inverted orientation	IV	3465468	-	IV	3483131	+	CT	--	17663
CD0037a	fcd-2	Mechlorethamine	20	Inverted orientation	IV	3479262	+	IV	3480585	-	GAT	--	1323
CD0037a	fcd-2	Mechlorethamine	20	Inverted orientation	IV	13545385	+	IV	13546407	-	--	GTTCCTGGTTG	1022
CD0037c	fcd-2	Mechlorethamine	20	Tandem duplication	I	8478366	-	I	8501748	-	TA	--	23382
CD0039c	fan-1	Cisplatin	0	Deletion	IV	12983987	+	IV	12988291	+	AT	--	4304
CD0041d	lig-4; fcd-2	Cisplatin	0	Deletion	III	7522654	+	III	7524197	+	C	--	1543
CD0042a	lig-4	Cisplatin	0	Tandem duplication	V	8592775	-	V	8622609	-	T	--	29834
CD0042d	lig-4	Cisplatin	0	Tandem duplication	V	7366805	-	V	7372490	-	G	--	5685
CD0043a	mus-81	Cisplatin	0	Deletion	IV	7679268	+	IV	7680202	+	T	--	934
CD0043a	mus-81	Cisplatin	0	Tandem duplication	IV	17303844	-	IV	17306310	-	--	--	2466
CD0043a	mus-81	Cisplatin	0	Inverted orientation	IV	17309124	+	IV	17309957	-	TTA	--	833
CD0043a	mus-81	Cisplatin	0	Deletion	X	7825383	+	X	7828852	+	--	--	3469
CD0043c	mus-81	Cisplatin	0	Inverted orientation	III	465650	-	III	475795	+	AACTTTGGTCTGCTAAATATTTAGC	--	10145
CD0043c	mus-81	Cisplatin	0	Tandem duplication	III	6491376	-	III	6498908	-	--	--	7532
CD0043c	mus-81	Cisplatin	0	Deletion	III	8264459	+	III	8265882	+	T	--	1423
CD0043c	mus-81	Cisplatin	0	Tandem duplication	IV	9969767	-	IV	9976133	-	--	--	6366
CD0043d	mus-81	Cisplatin	0	Deletion	III	950321	+	III	968878	+	C	--	18557
CD0045c	slx-1	Cisplatin	0	Tandem duplication	IV	9457867	-	IV	9461540	-	A	--	3673
CD0045d	slx-1	Cisplatin	0	Deletion	I	4732351	+	I	4742296	+	--	TTTATGAGTTGTCCAGTT	9945
CD0045d	slx-1	Cisplatin	0	Tandem duplication	III	4064930	-	III	4069584	-	--	--	4654
CD0045d	slx-1	Cisplatin	0	Tandem duplication	IV	10415868	-	IV	10425722	-	--	--	9854
CD0045d	slx-1	Cisplatin	0	Tandem duplication	IV	10415912	-	IV	10420383	-	A	--	4471
CD0045d	slx-1	Cisplatin	0	Deletion	IV	10417566	+	IV	10420319	+	CA	--	2753
CD0045d	slx-1	Cisplatin	0	Deletion	IV	10418346	+	IV	10419229	+	CG	--	883
CD0045d	slx-1	Cisplatin	0	Deletion	IV	10422295	+	IV	10424273	+	A	--	1978
CD0045d	slx-1	Cisplatin	0	Deletion	IV	14562633	+	IV	14567548	+	C	--	4915
CD0047c	N2	Cisplatin	10	Tandem duplication	II	7038424	-	II	7039380	-	--	--	956
CD0048a	fan-1	Cisplatin	10	Translocation	III	4482803	-	V	12907879	-	--	--	NA
CD0048c	fan-1	Cisplatin	10	Inverted orientation	III	6255699	-	III	6257842	+	CA	--	2143
CD0048c	fan-1	Cisplatin	10	Inverted orientation	V	3162412	+	V	9738864	-	GCGA	--	6576452
CD0048c	fan-1	Cisplatin	10	Inverted orientation	V	3162414	-	V	9783878	+	GG	--	6621464
CD0048d	fan-1	Cisplatin	10	Inverted orientation	X	5932898	+	X	6308026	-	A	--	375128
CD0048d	fan-1	Cisplatin	10	Inverted orientation	X	5936873	-	X	15942758	+	CAT	--	10005885
CD0048d	fan-1	Cisplatin	10	Inverted orientation	X	5937370	+	X	6299774	-	AGCTT	--	362404
CD0048d	fan-1	Cisplatin	10	Inverted orientation	X	5937371	-	X	6299783	+	C	--	362412
CD0048d	fan-1	Cisplatin	10	Deletion	X	6297486	+	X	15922935	+	--	--	9625449
CD0048d	fan-1	Cisplatin	10	Tandem duplication	X	6298203	-	X	6310524	-	--	--	12321
CD0048d	fan-1	Cisplatin	10	Deletion	X	6299777	+	X	15945077	+	G	--	9645300
CD0048d	fan-1	Cisplatin	10	Inverted orientation	X	6299789	-	X	15945073	+	AACT	--	9645284
CD0048d	fan-1	Cisplatin	10	Tandem duplication	X	15914345	-	X	15946056	-	A	--	31711
CD0048d	fan-1	Cisplatin	10	Tandem duplication	X	15915809	-	X	15945196	-	TC	--	29387
CD0048d	fan-1	Cisplatin	10	Deletion	X	15915810	+	X	15918935	+	--	--	3125
CD0048d	fan-1	Cisplatin	10	Inverted orientation	X	15933418	+	X	15944149	-	C	--	10731
CD0049d	fcd-2	Cisplatin	10	Inverted orientation	I	1298775	+	I	1423748	-	T	--	124973
CD0049d	fcd-2	Cisplatin	10	Inverted orientation	I	1303714	-	I	1420436	+	CGA	--	116722
CD0050a	lig-4; fcd-2	Cisplatin	10	Deletion	X	8060935	+	X	8061795	+	--	TTTG	860
CD0051d	lig-4	Cisplatin	10	Tandem duplication	V	6002948	-	V	6015860	-	G	--	12912
CD0051d	lig-4	Cisplatin	10	Deletion	V	6005530	+	V	6767160	+	--	--	761630
CD0051d	lig-4	Cisplatin	10	Tandem duplication	V	6005666	-	V	6767157	-	CT	--	761491
CD0052a	mus-81	Cisplatin	10	Deletion	I	7471671	+	I	7473135	+	--	--	1464
CD0052a	mus-81	Cisplatin	10	Deletion	V	10821867	+	V	10824281	+	--	--	2414
CD0052a	mus-81	Cisplatin	10	Tandem duplication	V	17913554	-	V	17913892	-	GATATCGAAAAACTTCCAATTGGCAAAATACATGAAATTTTTAGCTTTACAACTTTGACGAATTTTTAGTATTGCAAAG	--	338
CD0052a	mus-81	Cisplatin	10	Inverted orientation	X	1396901	+	X	1414156	-	--	--	17255
CD0052a	mus-81	Cisplatin	10	Inverted orientation	X	1401720	-	X	1412667	+	GG	--	10947
CD0052a	mus-81	Cisplatin	10	Deletion	X	1412687	+	X	1413675	+	--	--	988
CD0052c	mus-81	Cisplatin	10	Deletion	III	9725949	+	III	9726078	+	--	--	129
CD0052c	mus-81	Cisplatin	10	Inverted orientation	X	13803181	+	X	13803251	-	--	--	70
CD0052c	mus-81	Cisplatin	10	Inverted orientation	X	13803182	-	X	13817036	+	--	--	13854
CD0052d	mus-81	Cisplatin	10	Inverted orientation	I	2933460	-	I	2943005	+	--	G	9545
CD0052d	mus-81	Cisplatin	10	Deletion	I	11798904	+	I	11859885	+	--	CTTTAAAAT	60981
CD0052d	mus-81	Cisplatin	10	Translocation	III	10885315	+	X	13542452	-	GT	--	NA
CD0052d	mus-81	Cisplatin	10	Tandem duplication	X	11747729	-	X	11766345	-	C	--	18616
CD0052d	mus-81	Cisplatin	10	Inverted orientation	X	11759686	+	X	11759923	-	--	AAA	237
CD0052d	mus-81	Cisplatin	10	Inverted orientation	X	11766581	+	X	11766754	-	--	--	173
CD0053c	polq-1	Cisplatin	10	Translocation	III	3742154	+	IV	10491589	+	A	--	NA
CD0053c	polq-1	Cisplatin	10	Translocation	III	3761627	-	IV	10465578	-	G	--	NA
CD0054a	slx-1	Cisplatin	10	Deletion	IV	3740280	+	IV	3740800	+	--	--	520
CD0054c	slx-1	Cisplatin	10	Tandem duplication	I	7251996	-	I	7269587	-	CA	--	17591
CD0054c	slx-1	Cisplatin	10	Inverted orientation	I	7257085	+	I	7257888	-	--	G	803
CD0054c	slx-1	Cisplatin	10	Inverted orientation	I	7258432	-	I	7258918	+	--	CACAT	486
CD0054c	slx-1	Cisplatin	10	Deletion	I	7266948	+	I	7268431	+	CA	--	1483
CD0054c	slx-1	Cisplatin	10	Deletion	II	11815013	+	II	11820364	+	T	--	5351
CD0054c	slx-1	Cisplatin	10	Tandem duplication	X	4579601	-	X	4587794	-	T	--	8193
CD0054c	slx-1	Cisplatin	10	Deletion	X	13422957	+	X	13427600	+	--	--	4643
CD0054d	slx-1	Cisplatin	10	Inverted orientation	III	11699754	-	III	11713108	+	--	--	13354
CD0054d	slx-1	Cisplatin	10	Inverted orientation	III	11713105	+	III	11713210	-	C	--	105
CD0054d	slx-1	Cisplatin	10	Tandem duplication	V	16129775	-	V	16139606	-	A	--	9831
CD0055a	xpf-1	Cisplatin	10	Tandem duplication	II	1457796	-	II	1486370	-	A	--	28574
CD0055a	xpf-1	Cisplatin	10	Inverted orientation	II	13841792	-	II	13842349	+	A	--	557
CD0055a	xpf-1	Cisplatin	10	Translocation	II	13843475	-	X	1150360	-	--	--	NA
CD0055a	xpf-1	Cisplatin	10	Deletion	II	13847083	+	II	13847806	+	A	--	723
CD0055a	xpf-1	Cisplatin	10	Translocation	II	13849067	-	X	1146292	+	--	--	NA
CD0055a	xpf-1	Cisplatin	10	Translocation	II	13852566	+	X	1147548	+	T	--	NA
CD0055a	xpf-1	Cisplatin	10	Deletion	V	10008856	+	V	10008970	+	A	--	114
CD0055c	xpf-1	Cisplatin	10	Deletion	II	4160919	+	II	4161146	+	GAA	--	227
CD0055c	xpf-1	Cisplatin	10	Translocation	II	12494270	-	IV	5182962	+	CCG	--	NA
CD0055c	xpf-1	Cisplatin	10	Inverted orientation	II	12494276	-	II	12494776	+	A	--	500
CD0055c	xpf-1	Cisplatin	10	Inverted orientation	III	4820151	+	III	7340680	-	--	--	2520529
CD0055c	xpf-1	Cisplatin	10	Tandem duplication	IV	5175665	-	IV	5190358	-	G	--	14693
CD0055d	xpf-1	Cisplatin	10	Deletion	IV	1019965	+	IV	1020076	+	--	CCCG	111
CD0055d	xpf-1	Cisplatin	10	Inverted orientation	IV	15466037	+	IV	15470911	-	A	--	4874
CD0055d	xpf-1	Cisplatin	10	Translocation	IV	15462535	-	V	9713837	-	TC		NA
CD0055d	xpf-1	Cisplatin	10	Inverted orientation	V	9690887	-	V	9692068	+	--	T	1181
CD0055d	xpf-1	Cisplatin	10	Tandem duplication	V	9696180	-	V	9697047	-	--	--	867
CD0055d	xpf-1	Cisplatin	10	Deletion	V	9700556	+	V	9701376	+	--	--	820
CD0055d	xpf-1	Cisplatin	10	Inverted orientation	V	9707595	-	V	9708041	+	G	--	446
CD0056a	N2	Cisplatin	50	Tandem duplication	II	11503101	-	II	11515775	-	--	TTGAGAGAAAATG	12674
CD0056a	N2	Cisplatin	50	Tandem duplication	II	11505966	-	II	11511797	-	TC	--	5831
CD0056a	N2	Cisplatin	50	Deletion	V	9757667	+	V	9757831	+	TT	--	164
CD0056c	N2	Cisplatin	50	Deletion	IV	1653654	+	IV	1653898	+	AAATT	--	244
CD0056c	N2	Cisplatin	50	Deletion	IV	16690137	+	IV	16690270	+	--	AAC	133
CD0056c	N2	Cisplatin	50	Deletion	IV	16693384	+	IV	16693866	+	A	--	482
CD0056c	N2	Cisplatin	50	Inverted orientation	V	14953934	-	V	14954908	+	--	--	974
CD0056c	N2	Cisplatin	50	Inverted orientation	V	14957592	+	V	18198015	-	--	--	3240423
CD0056c	N2	Cisplatin	50	Inverted orientation	V	18193414	-	V	18196873	+	--	--	3459
CD0056c	N2	Cisplatin	50	Deletion	V	18194083	+	V	18196987	+	--	TGACAAATTGAAATGAAAG	2904
CD0057a	fan-1	Cisplatin	50	Tandem duplication	I	957933	-	I	958316	-	--	GTTCAGCAAATCTAC	383
CD0057a	fan-1	Cisplatin	50	Inverted orientation	II	10768047	-	II	10768468	+	--	--	421
CD0057a	fan-1	Cisplatin	50	Deletion	II	10771312	+	II	13993475	+	A	--	3222163
CD0057a	fan-1	Cisplatin	50	Translocation	II	13996352	+	IV	14106571	-	TTG	--	NA
CD0057a	fan-1	Cisplatin	50	Tandem duplication	IV	7189060	-	IV	7201981	-	A	--	12921
CD0057a	fan-1	Cisplatin	50	Translocation	IV	14098379	-	V	4358455	-	A	--	NA
CD0057d	fan-1	Cisplatin	50	Deletion	V	1799499	+	V	1808525	+	--	--	9026
CD0057d	fan-1	Cisplatin	50	Deletion	V	14593715	+	V	14594475	+	--	C	760
CD0058a	fcd-2	Cisplatin	50	Translocation	II	3020963	+	X	15953836	+	--	T	NA
CD0058a	fcd-2	Cisplatin	50	Translocation	II	3020973	-	X	15953832	-	C	--	NA
CD0058a	fcd-2	Cisplatin	50	Deletion	II	3344475	+	II	6014348	+	--	GC	2669873
CD0058a	fcd-2	Cisplatin	50	Deletion	III	13330324	+	III	13330848	+	--	--	524
CD0058c	fcd-2	Cisplatin	50	Inverted orientation	I	3863417	-	I	3864455	+	C	--	1038
CD0058c	fcd-2	Cisplatin	50	Translocation	I	3864457	+	IV	15212732	+	T	--	NA
CD0058c	fcd-2	Cisplatin	50	Inverted orientation	I	3865592	+	I	3872836	-	AAG	--	7244
CD0058c	fcd-2	Cisplatin	50	Translocation	I	3867418	-	X	12962909	+	--	--	NA
CD0058c	fcd-2	Cisplatin	50	Inverted orientation	IV	15229597	+	IV	15229936	-	T	--	339
CD0058c	fcd-2	Cisplatin	50	Inverted orientation	X	12961864	+	X	13016188	-	A	--	54324
CD0058d	fcd-2	Cisplatin	50	Deletion	I	3373410	+	I	3408166	+	G	--	34756
CD0058d	fcd-2	Cisplatin	50	Tandem duplication	I	11307193	-	I	11491429	-	A	--	184236
CD0059a	lig-4; fcd-2	Cisplatin	50	Deletion	III	6171449	+	III	6171719	+	A	--	270
CD0059d	lig-4; fcd-2	Cisplatin	50	Tandem duplication	IV	17349835	-	IV	17366464	-	--	--	16629
CD0060a	lig-4	Cisplatin	50	Inverted orientation	X	5445779	-	X	5451246	+	C	--	5467
CD0060a	lig-4	Cisplatin	50	Inverted orientation	X	5461337	+	X	5464486	-	TTGT	--	3149
CD0060c	lig-4	Cisplatin	50	Inverted orientation	I	6335388	+	I	6336178	-	G	--	790
CD0060d	lig-4	Cisplatin	50	Tandem duplication	X	3506423	-	X	3516960	-	A	--	10537
CD0061a	mus-81	Cisplatin	50	Translocation	I	7628489	+	X	12797133	-	--	--	NA
CD0061a	mus-81	Cisplatin	50	Tandem duplication	III	4714528	-	III	4715369	-	--	--	841
CD0061a	mus-81	Cisplatin	50	Tandem duplication	III	7629417	-	III	7629999	-	--	--	582
CD0061a	mus-81	Cisplatin	50	Tandem duplication	III	9596026	-	III	9622207	-	--	TTAAAGAGTACT	26181
CD0061a	mus-81	Cisplatin	50	Inverted orientation	III	9610476	+	III	9611212	-	--	--	736
CD0061a	mus-81	Cisplatin	50	Inverted orientation	III	9611522	-	III	9612396	+	ACTG	--	874
CD0061a	mus-81	Cisplatin	50	Deletion	IV	6541594	+	IV	6541728	+	--	--	134
CD0061a	mus-81	Cisplatin	50	Tandem duplication	V	16823161	-	V	16827436	-	TG	--	4275
CD0061a	mus-81	Cisplatin	50	Deletion	X	16433198	+	X	16439376	+	G	--	6178
CD0061c	mus-81	Cisplatin	50	Inverted orientation	II	9267803	-	II	9277226	+	TTC	--	9423
CD0061c	mus-81	Cisplatin	50	Deletion	II	9274079	+	II	9276633	+	--	--	2554
CD0061d	mus-81	Cisplatin	50	Translocation	I	10328	+	X	14235529	+	G	--	NA
CD0061d	mus-81	Cisplatin	50	Deletion	II	10729411	+	II	10733974	+	--	--	4563
CD0061d	mus-81	Cisplatin	50	Deletion	V	11202821	+	V	11217670	+	--	--	14849
CD0062c	polq-1	Cisplatin	50	Inverted orientation	I	14076535	+	I	14077605	-	GA	--	1070
CD0062c	polq-1	Cisplatin	50	Inverted orientation	I	14076536	-	I	14088306	+	--	--	11770
CD0062c	polq-1	Cisplatin	50	Deletion	V	2695419	+	V	2709501	+	--	--	14082
CD0063a	slx-1	Cisplatin	50	Tandem duplication	II	5010672	-	II	5080185	-	--	--	69513
CD0063a	slx-1	Cisplatin	50	Tandem duplication	II	5011738	-	II	5080977	-	AAT	--	69239
CD0063a	slx-1	Cisplatin	50	Deletion	II	5024638	+	II	5053400	+	--	AT	28762
CD0063a	slx-1	Cisplatin	50	Inverted orientation	II	14346570	+	II	14355231	-	--	AAT	8661
CD0063a	slx-1	Cisplatin	50	Tandem duplication	II	14349090	-	II	14354606	-	--	TTCTGA	5516
CD0063a	slx-1	Cisplatin	50	Inverted orientation	V	4573620	-	V	15314104	+	G	--	10740484
CD0063a	slx-1	Cisplatin	50	Deletion	V	12238379	+	V	12239975	+	GA	--	1596
CD0063d	slx-1	Cisplatin	50	Inverted orientation	IV	15838296	-	IV	15839294	+	TTT	--	998
CD0064a	xpf-1	Cisplatin	50	Translocation	I	8527079	+	IV	4814953	+	--	TGTTC	NA
CD0064a	xpf-1	Cisplatin	50	Translocation	I	8537139	-	II	12218392	-	--	--	NA
CD0064a	xpf-1	Cisplatin	50	Inverted orientation	II	706619	+	II	12217946	-	TT	--	11511327
CD0064a	xpf-1	Cisplatin	50	Deletion	II	5895071	+	II	5895704	+	T	--	633
CD0064a	xpf-1	Cisplatin	50	Translocation	II	12214573	-	IV	4437776	+	GT	--	NA
CD0064a	xpf-1	Cisplatin	50	Translocation	II	12216080	+	IV	4443856	-	--	TGAT	NA
CD0064a	xpf-1	Cisplatin	50	Translocation	II	12216080	-	IV	4437982	-	A	--	NA
CD0064a	xpf-1	Cisplatin	50	Translocation	II	12217886	-	IV	6315558	+	--	--	NA
CD0064a	xpf-1	Cisplatin	50	Deletion	III	10117681	+	III	10117818	+	--	CTCGA	137
CD0064a	xpf-1	Cisplatin	50	Translocation	IV	4253606	-	V	8416617	+	CT	--	NA
CD0064a	xpf-1	Cisplatin	50	Inverted orientation	IV	4429193	+	IV	4819682	-	C	--	390489
CD0064a	xpf-1	Cisplatin	50	Inverted orientation	IV	4433728	-	IV	8373553	+	C	--	3939825
CD0064a	xpf-1	Cisplatin	50	Inverted orientation	IV	4438487	+	IV	4818819	-	GC	--	380332
CD0064a	xpf-1	Cisplatin	50	Inverted orientation	IV	4438494	-	IV	4819685	+	C	--	381191
CD0064a	xpf-1	Cisplatin	50	Translocation	IV	4444274	+	V	8523639	+	A	--	NA
CD0064a	xpf-1	Cisplatin	50	Tandem duplication	IV	4816196	-	IV	6307265	-	--	ATAGATCATCCACCACCAAAGTC	1491069
CD0064a	xpf-1	Cisplatin	50	Translocation	IV	4819689	-	V	8507541	+	T	--	NA
CD0064a	xpf-1	Cisplatin	50	Translocation	IV	4820687	-	V	8509542	-	--	T	NA
CD0064a	xpf-1	Cisplatin	50	Translocation	IV	4840106	+	V	8523632	-	--	AAAAAAATAGTTGCCAAATAAAAAAA	NA
CD0064a	xpf-1	Cisplatin	50	Tandem duplication	IV	5514107	-	IV	5552155	-	C	--	38048
CD0064a	xpf-1	Cisplatin	50	Deletion	IV	5562906	+	IV	5590773	+	G	--	27867
CD0064a	xpf-1	Cisplatin	50	Inverted orientation	IV	8367914	-	IV	8368129	+	T	--	215
CD0064a	xpf-1	Cisplatin	50	Translocation	IV	8383649	+	V	8412326	+	--	--	NA
CD0064a	xpf-1	Cisplatin	50	Deletion	V	6527356	+	V	6527617	+	--	ATA	261
CD0064a	xpf-1	Cisplatin	50	Deletion	V	12890521	+	V	12890682	+	CTC	--	161
CD0064c	xpf-1	Cisplatin	50	Translocation	II	171725	-	III	5173473	-	--	--	NA
CD0064c	xpf-1	Cisplatin	50	Tandem duplication	II	9994371	-	II	10002898	-	T	--	8527
CD0064c	xpf-1	Cisplatin	50	Deletion	III	1946828	+	III	4300907	+	--	--	2354079
CD0064d	xpf-1	Cisplatin	50	Translocation	I	1306331	+	IV	3219279	+	T	--	NA
CD0064d	xpf-1	Cisplatin	50	Translocation	II	15256534	+	X	1206836	-	--	TG	NA
CD0064d	xpf-1	Cisplatin	50	Deletion	X	14782565	+	X	14782914	+	--	C	349
