# Supplementary figures and images for: C. eleganswhole-genome sequencing reveals mutational signatures related to carcinogens and DNA repair deficiency
Source: HighWire-hosted journal article supplement (doi:10.1101/gr.175547.114), 2014-07-16

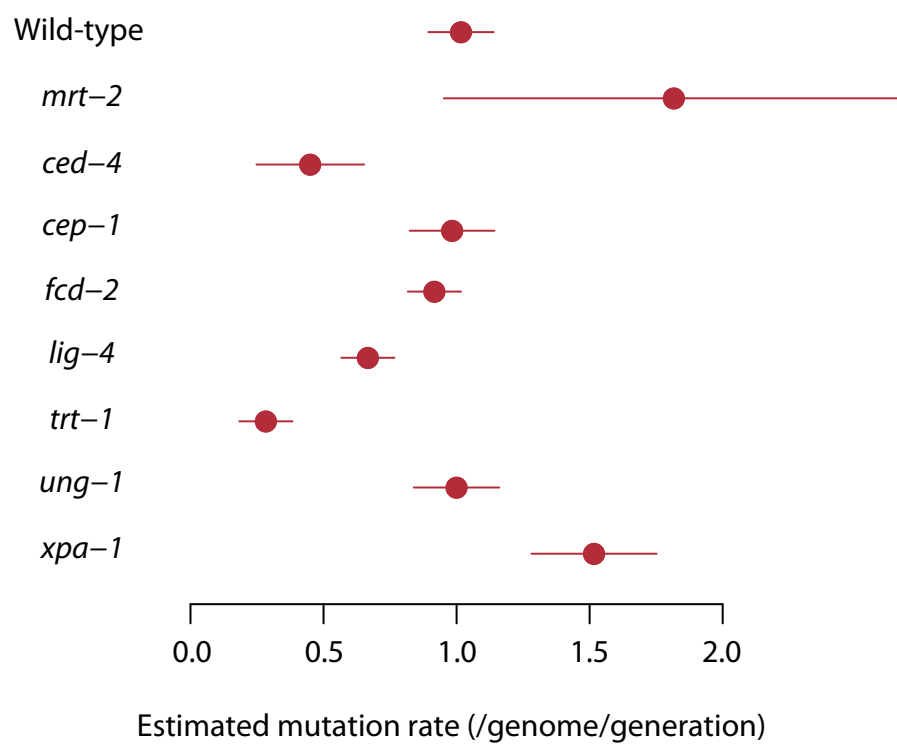

Figure S1

Supplement: Supplemental_Figure1.pdf [file Supplemental_Figure1.pdf]

CD0048d: *fan-1* null & Cisplatin 10 $\mu$ M

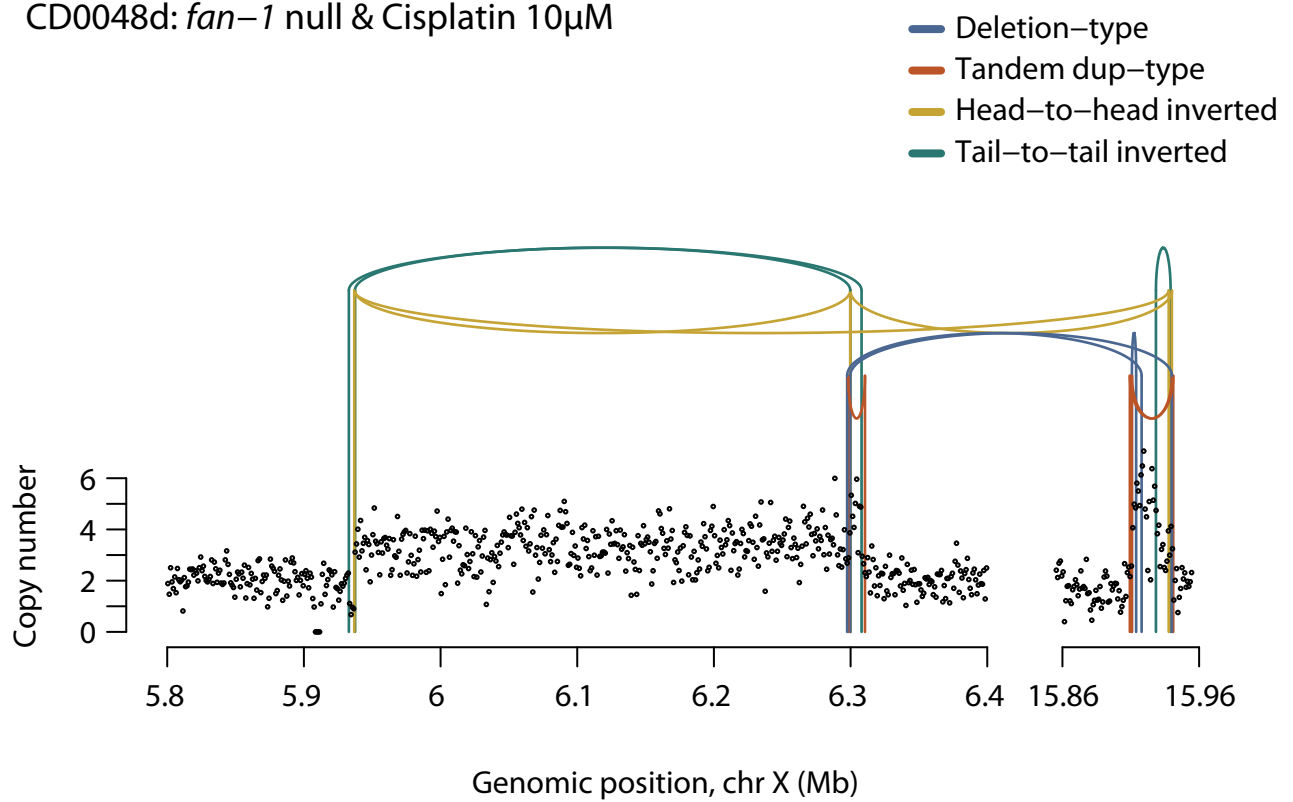

Figure S5

Supplement: Supplemental_Figure5.pdf [file Supplemental_Figure5.pdf]
